# Supplementary material
Source: PubMed Central journal article supplement (PMC5380836)
Supplement: tpj201593x2.pdf [file tpj201593x2.pdf]

S1

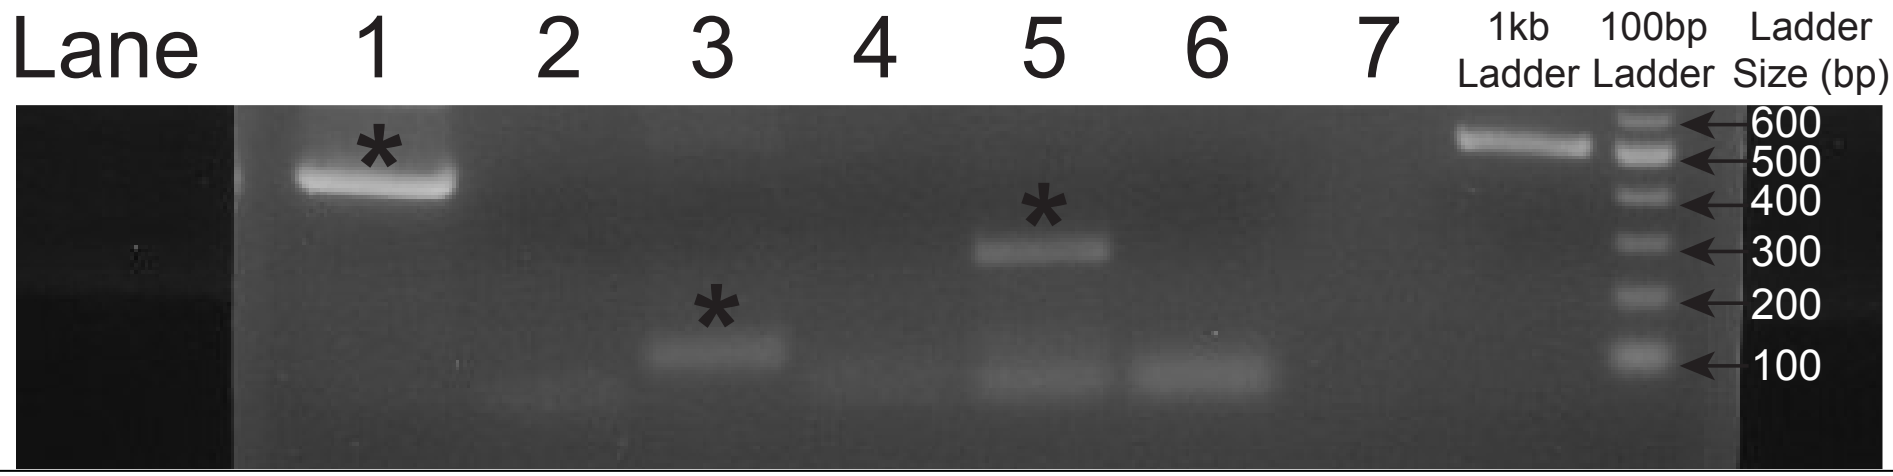

Lane 1

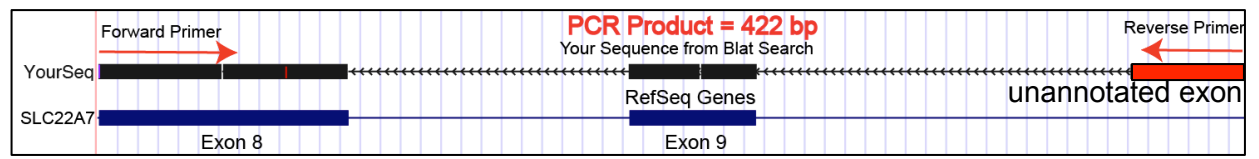

Lane 3

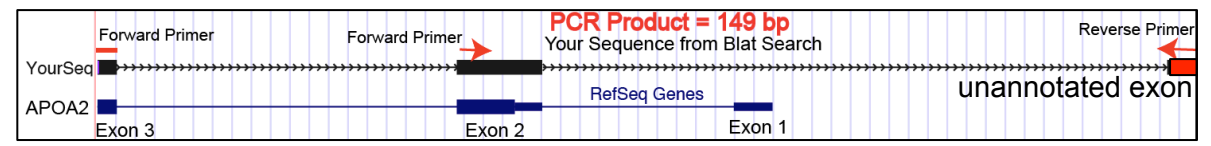

Lane 5

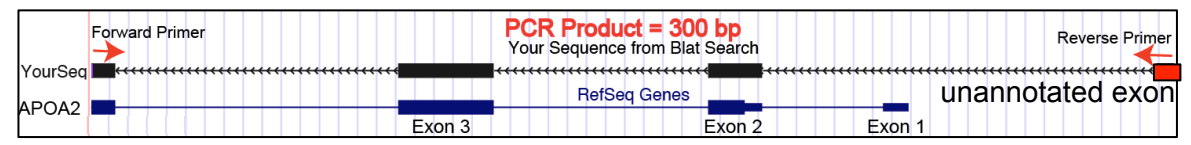

**HMGCR Exon 13 Exclusion/Inclusion**

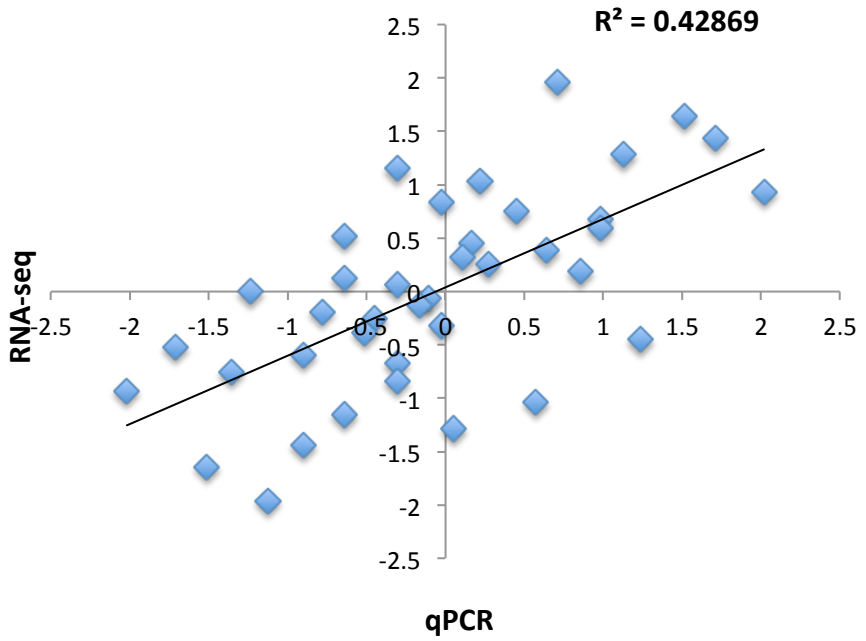

**LDLR Exon 4 Exclusion/Inclusion**

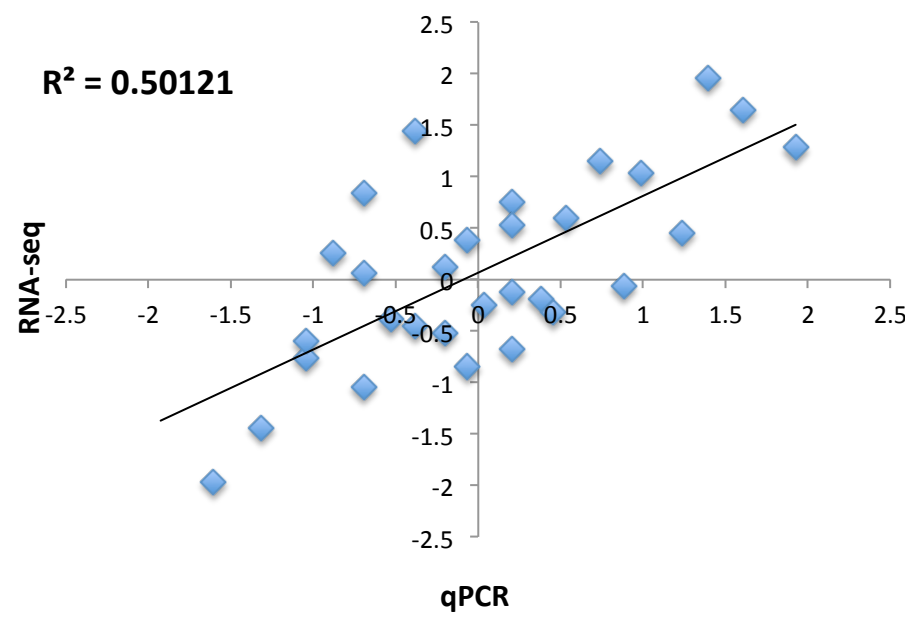

**S3**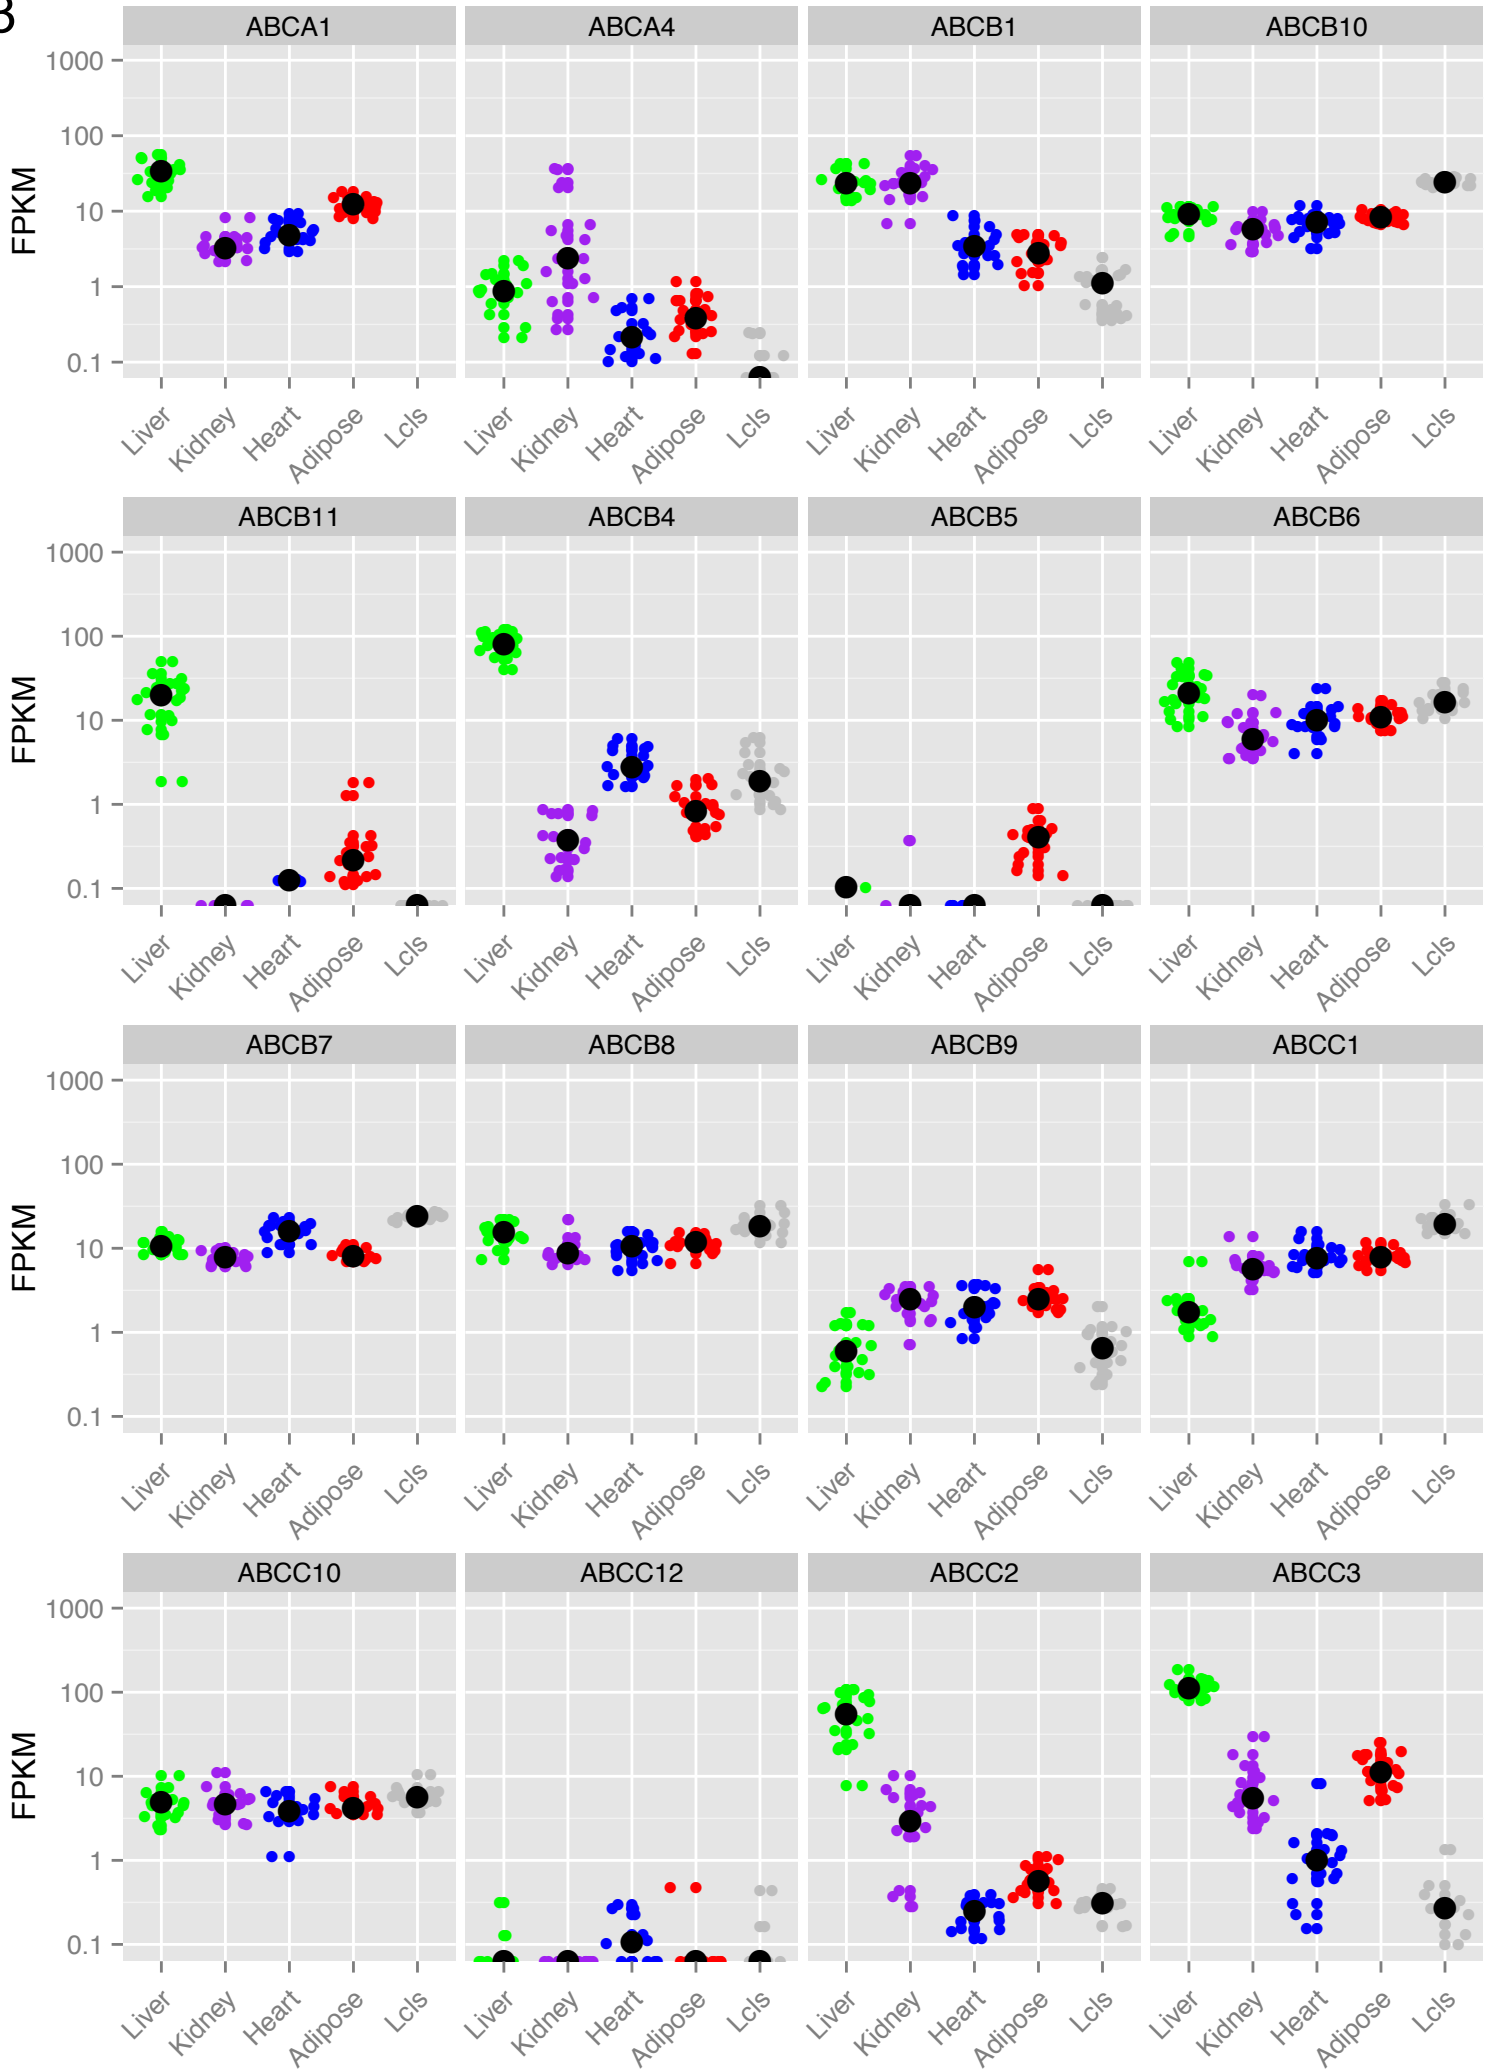

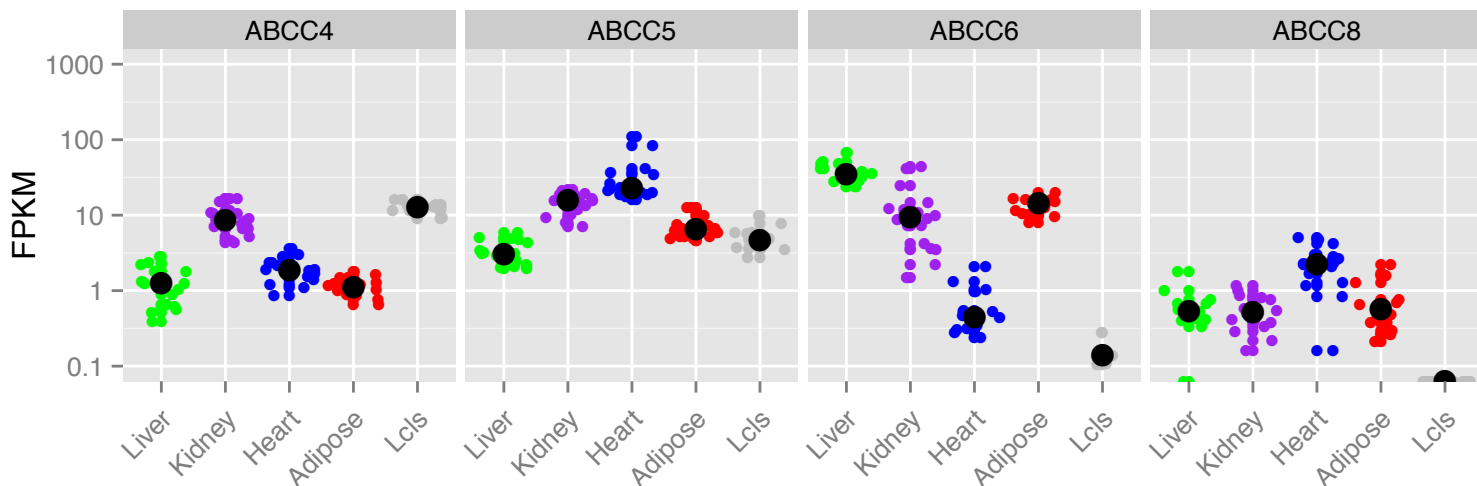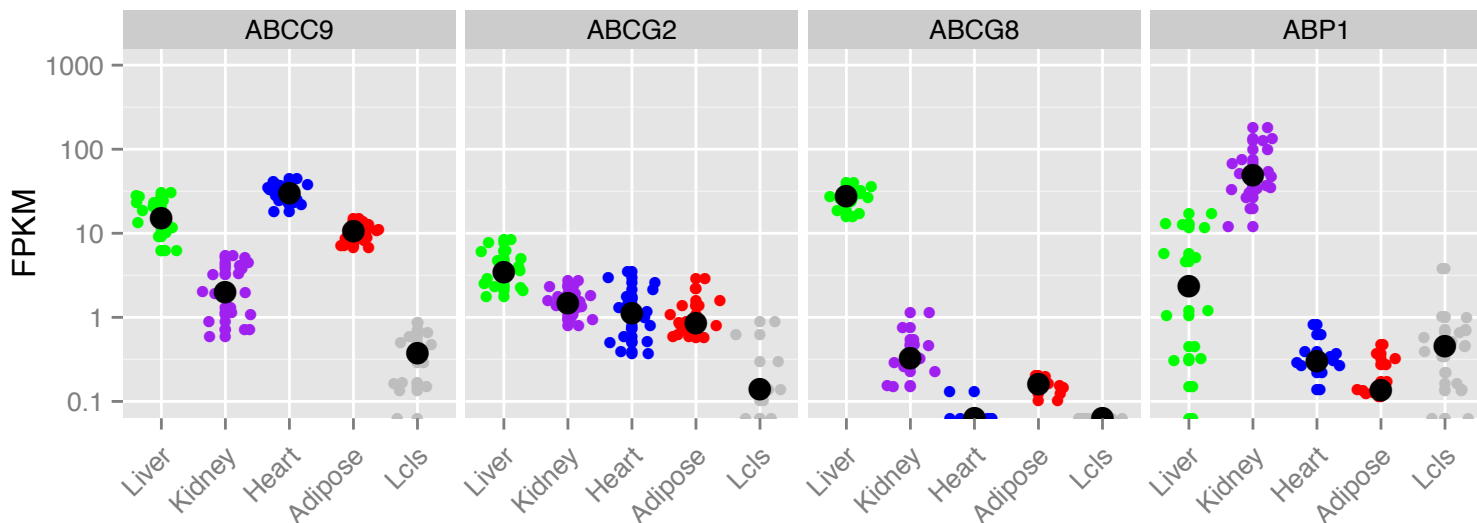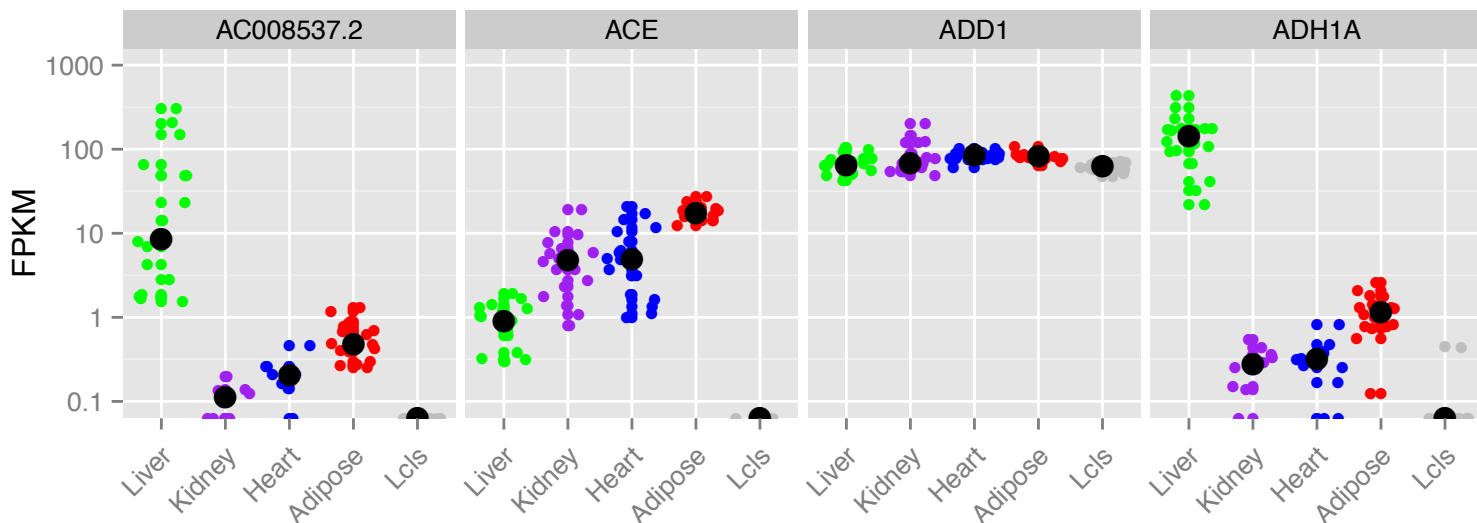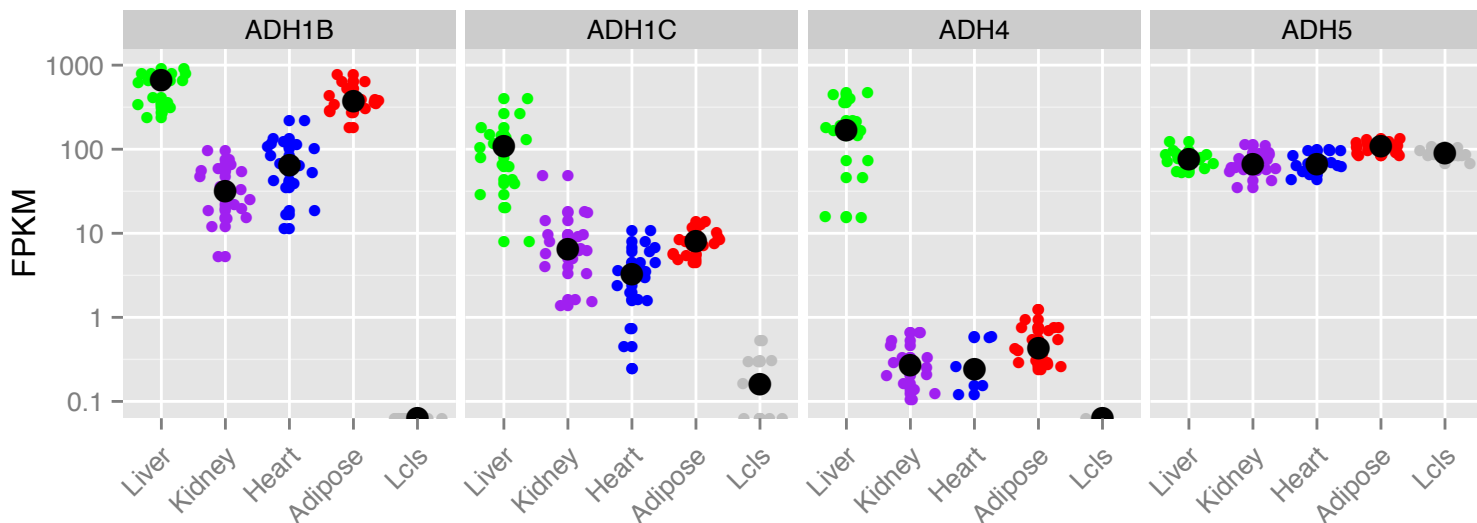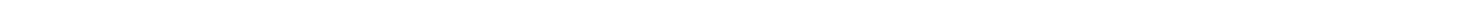

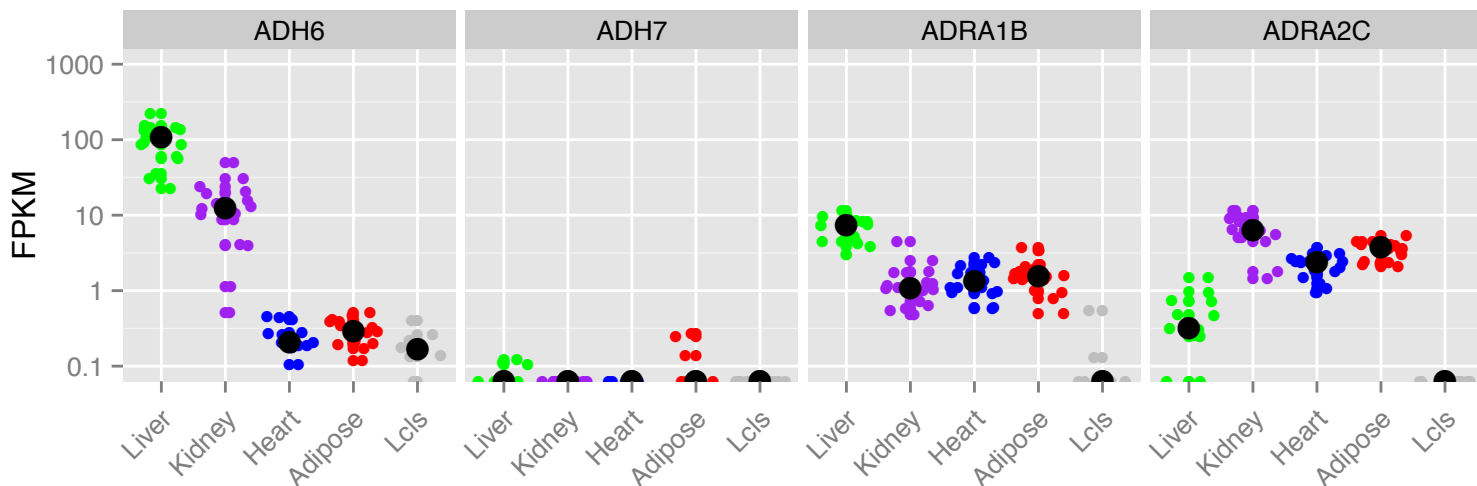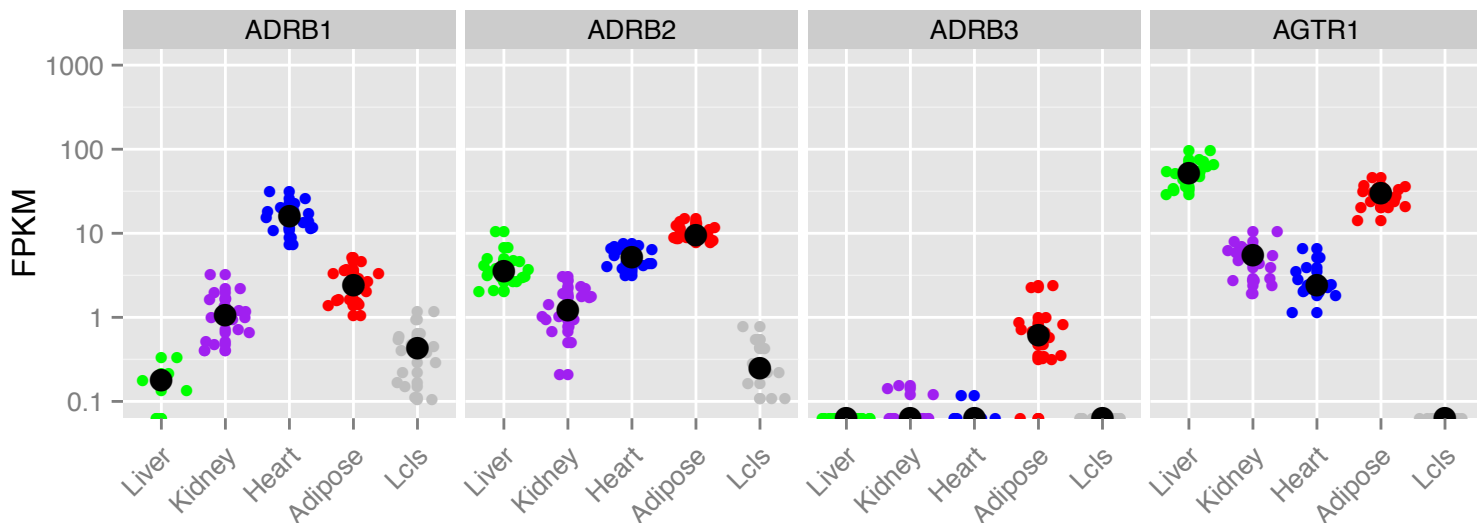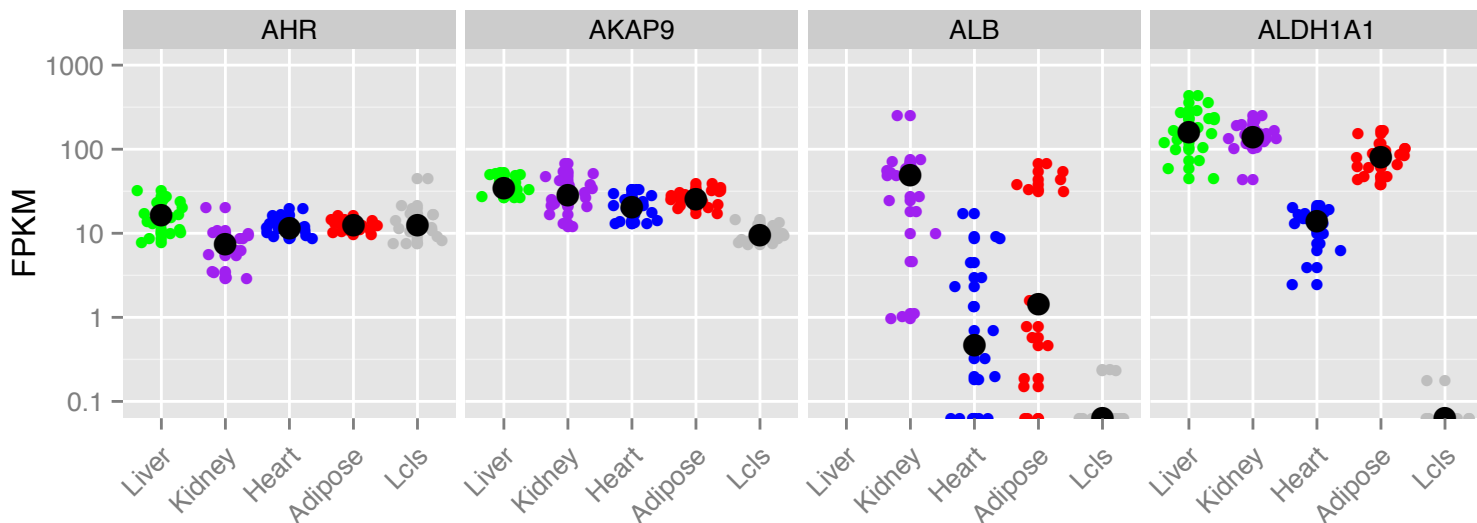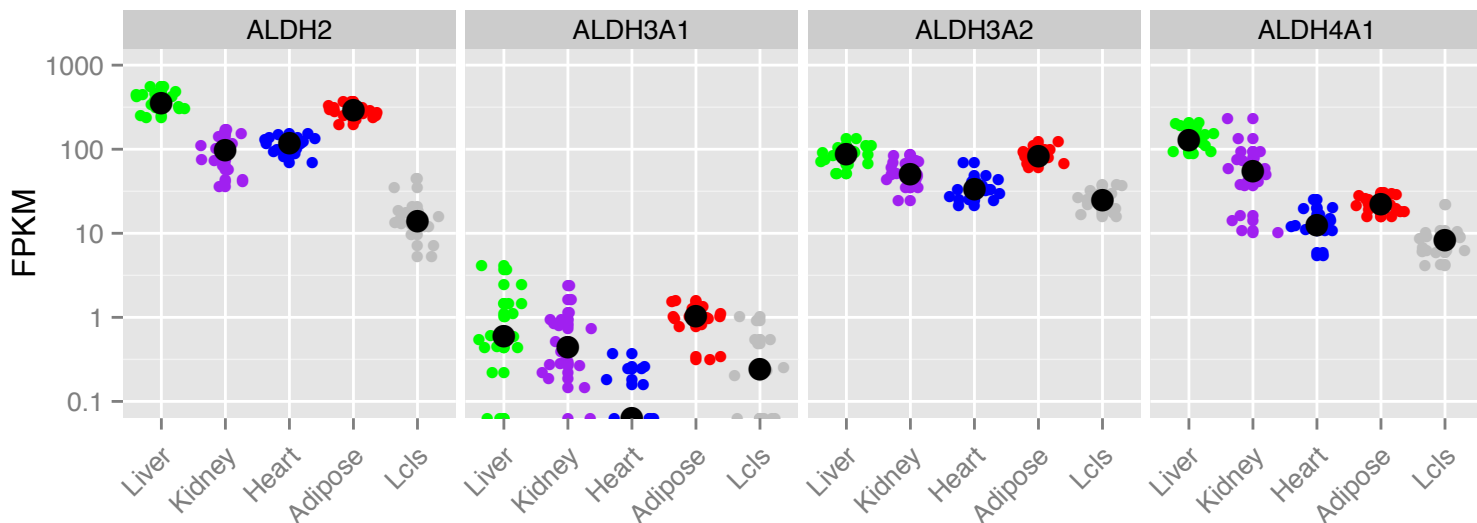

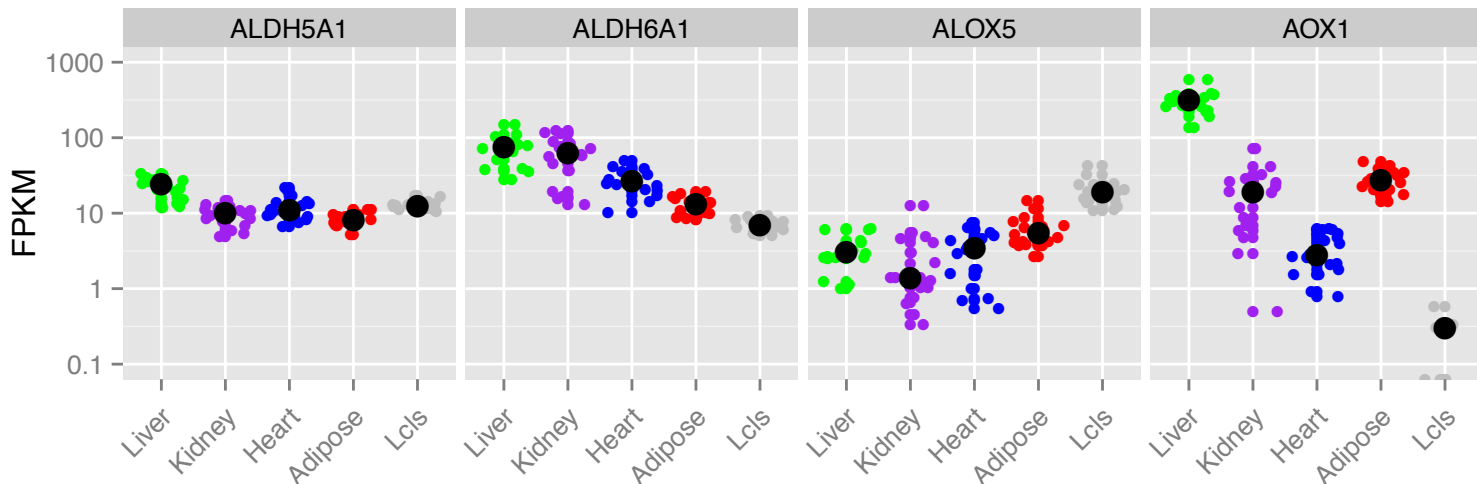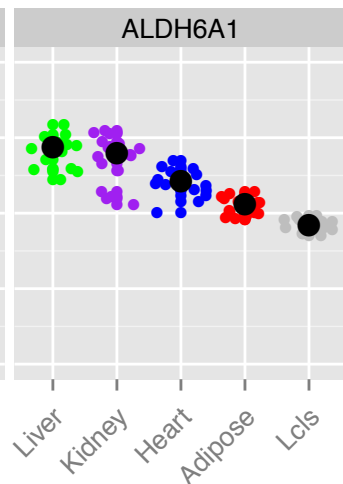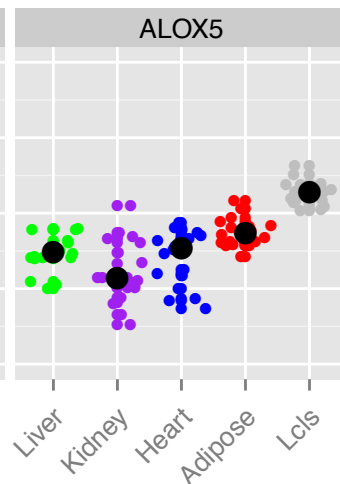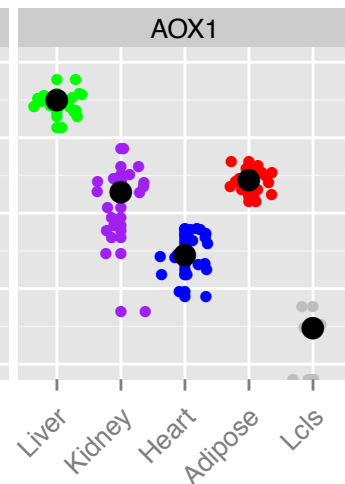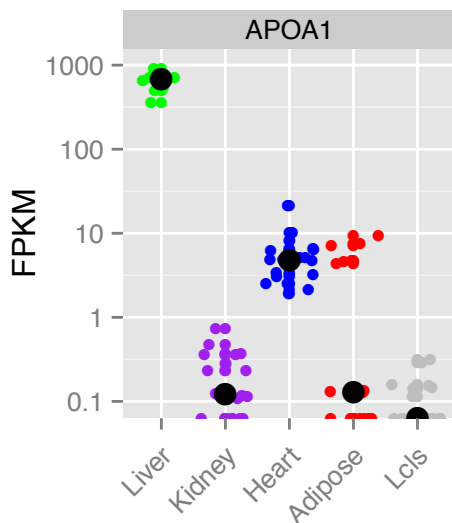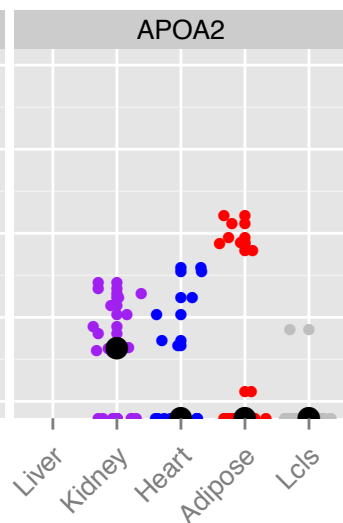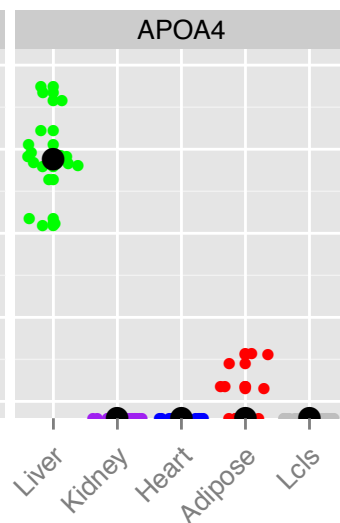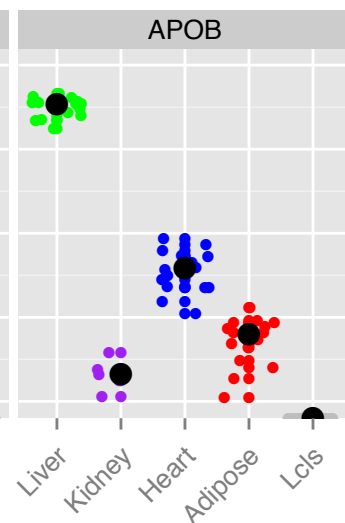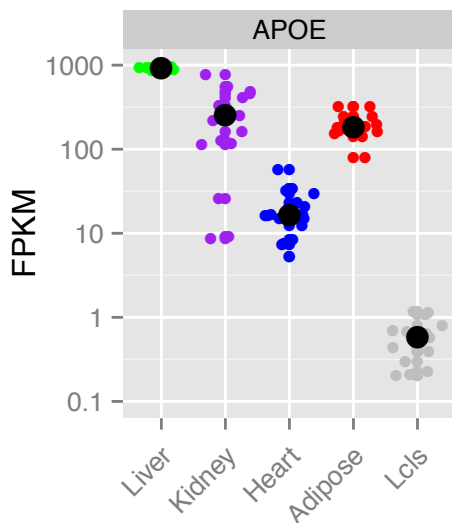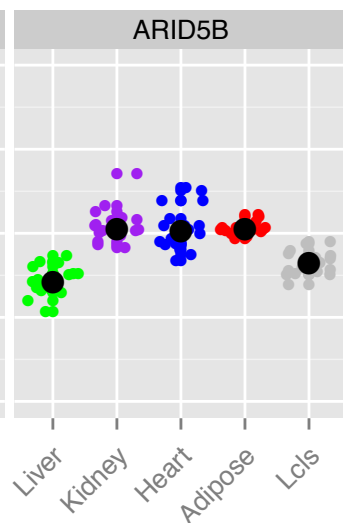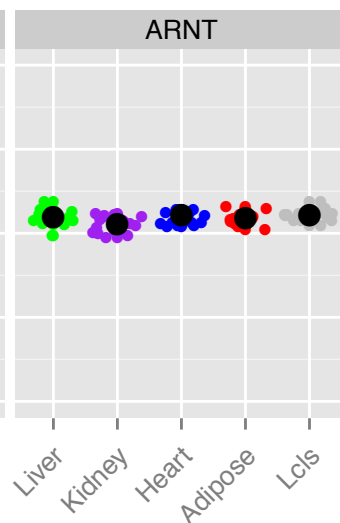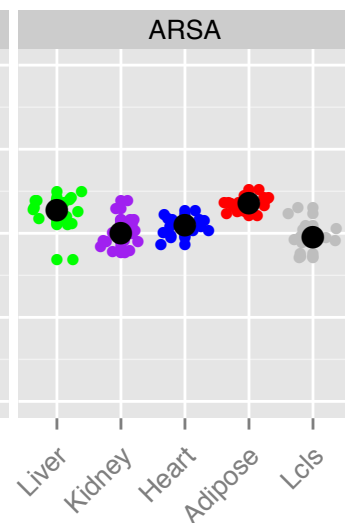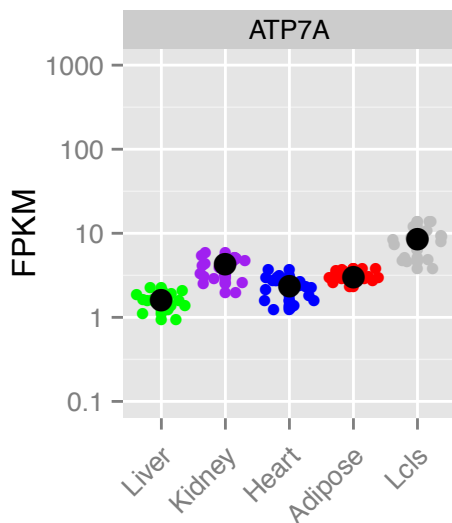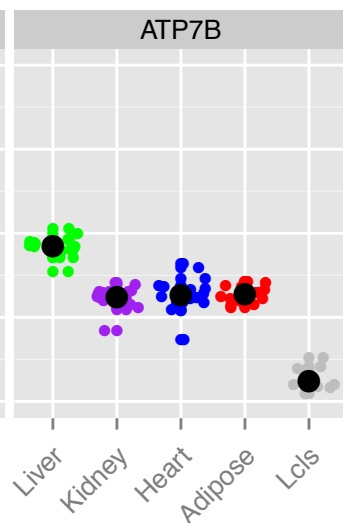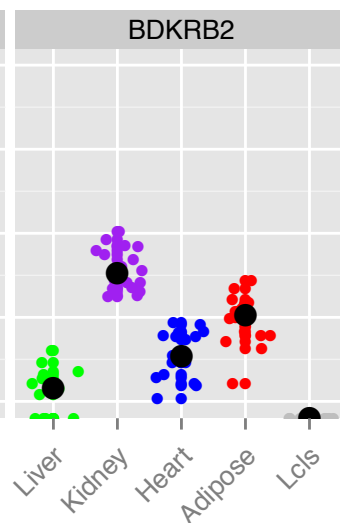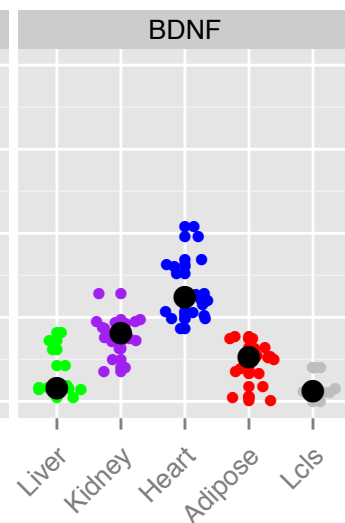

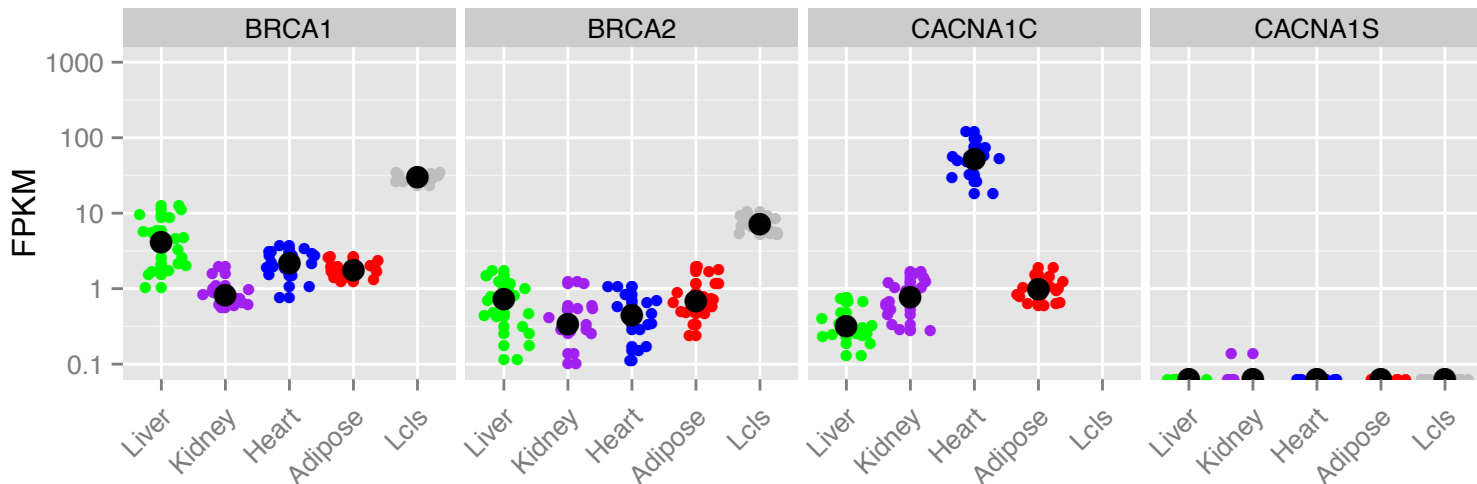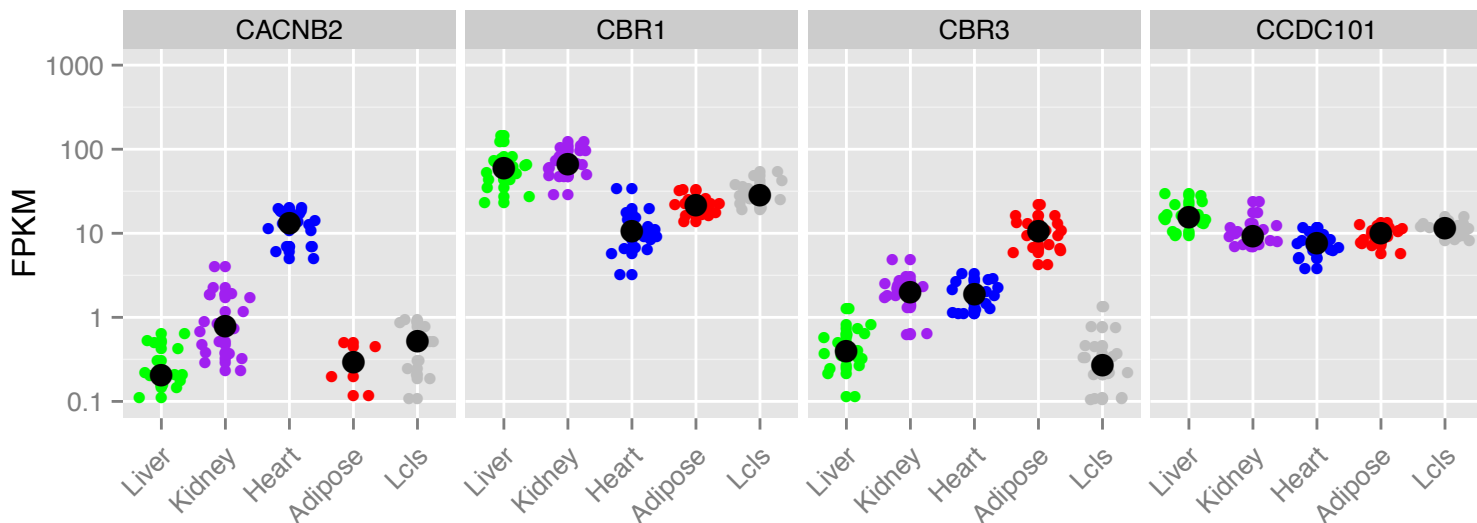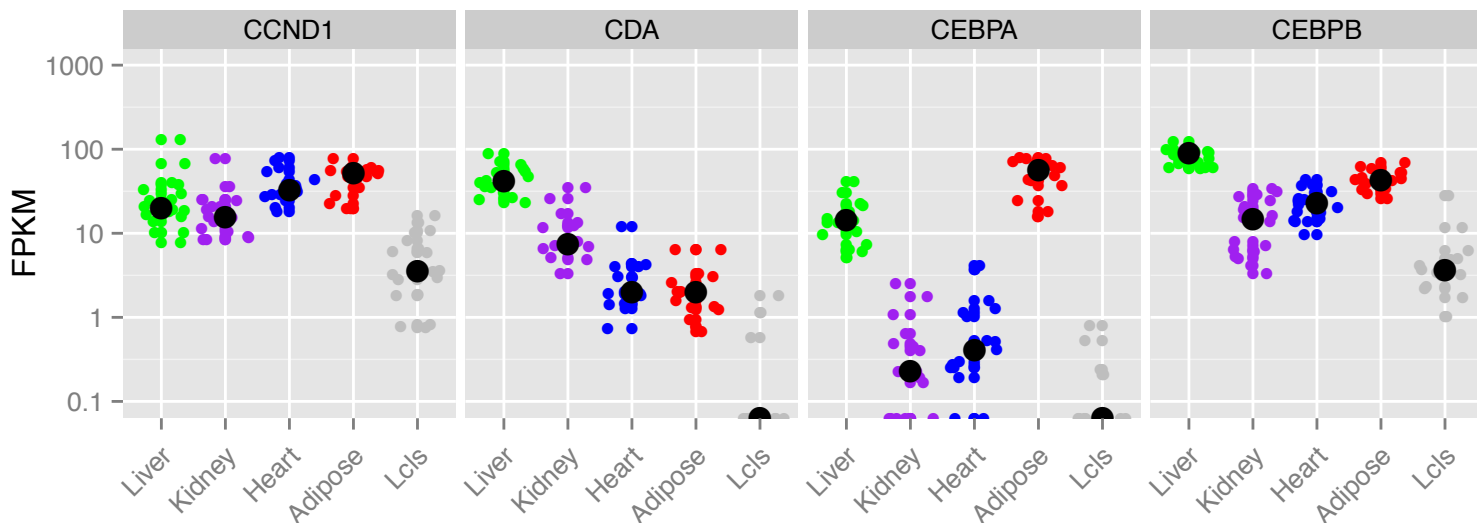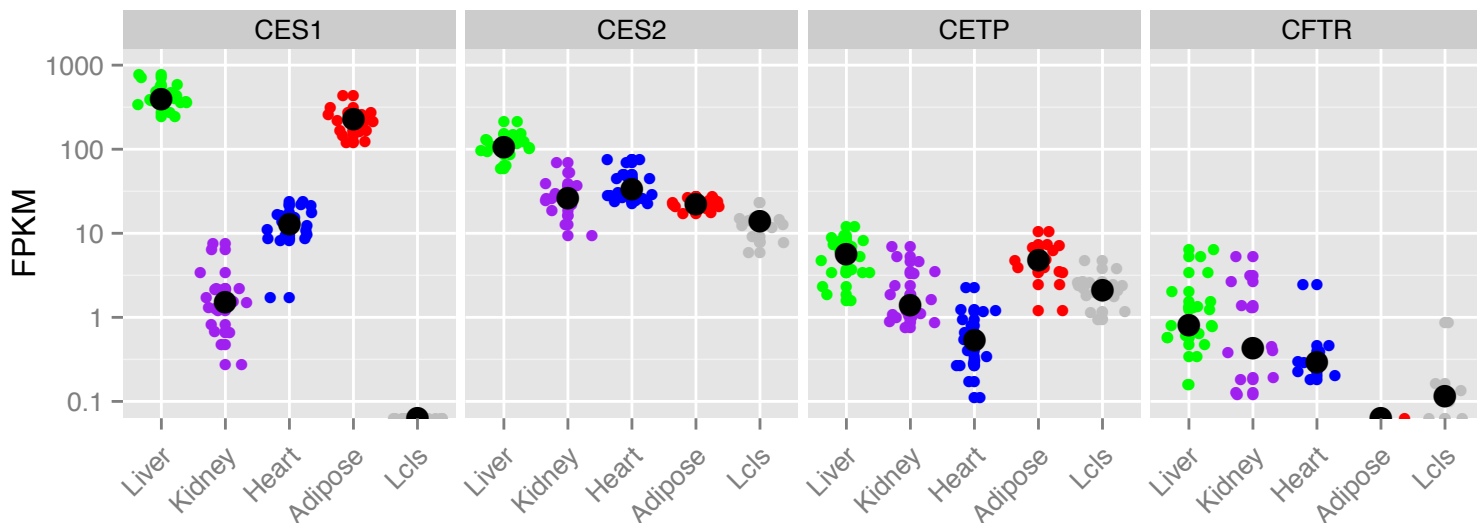

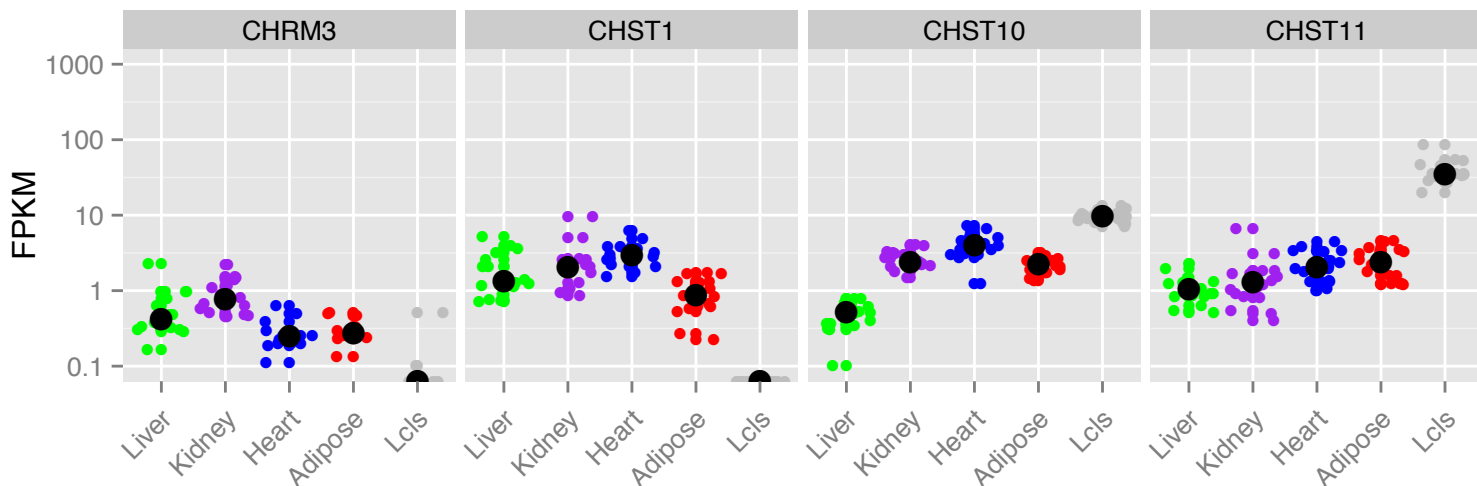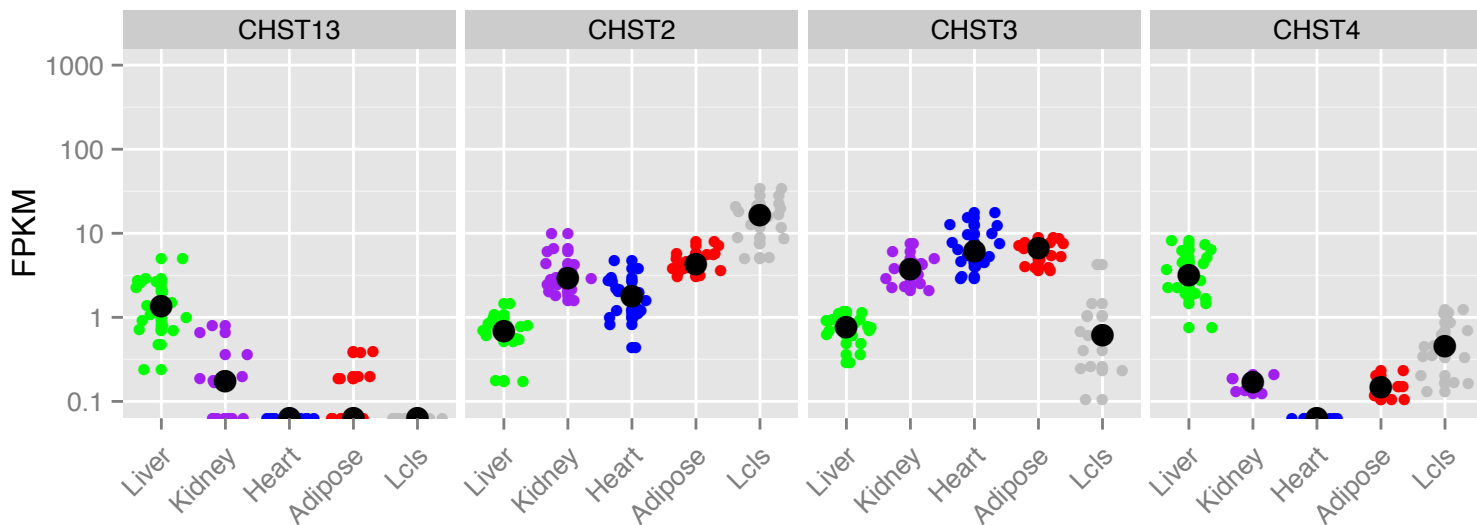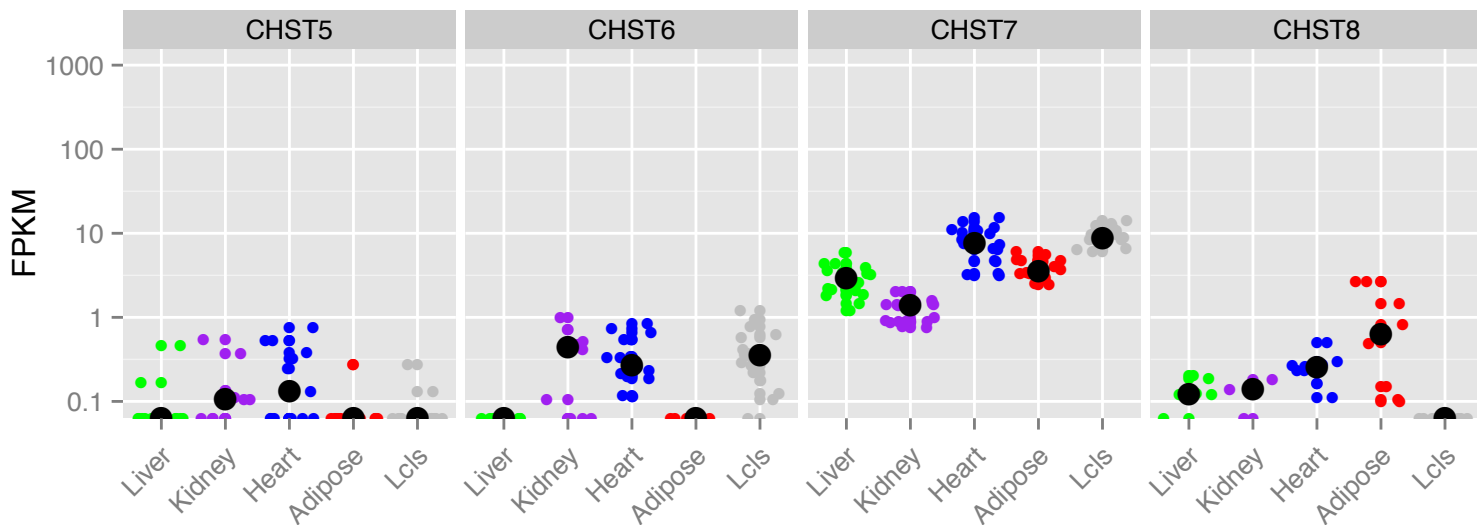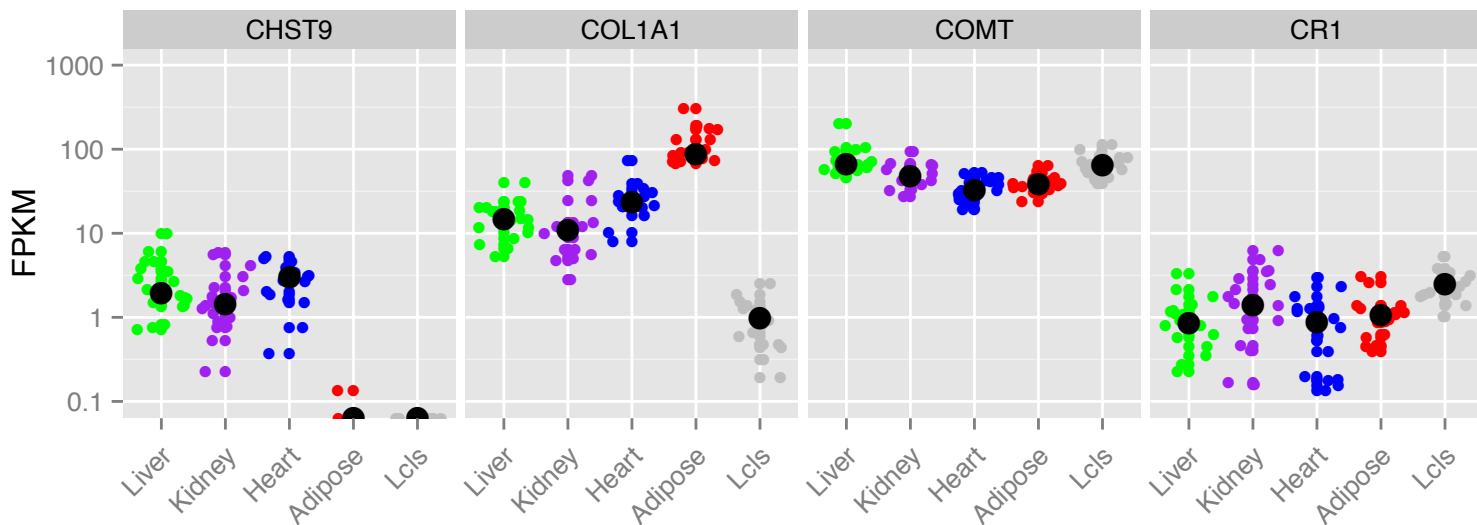



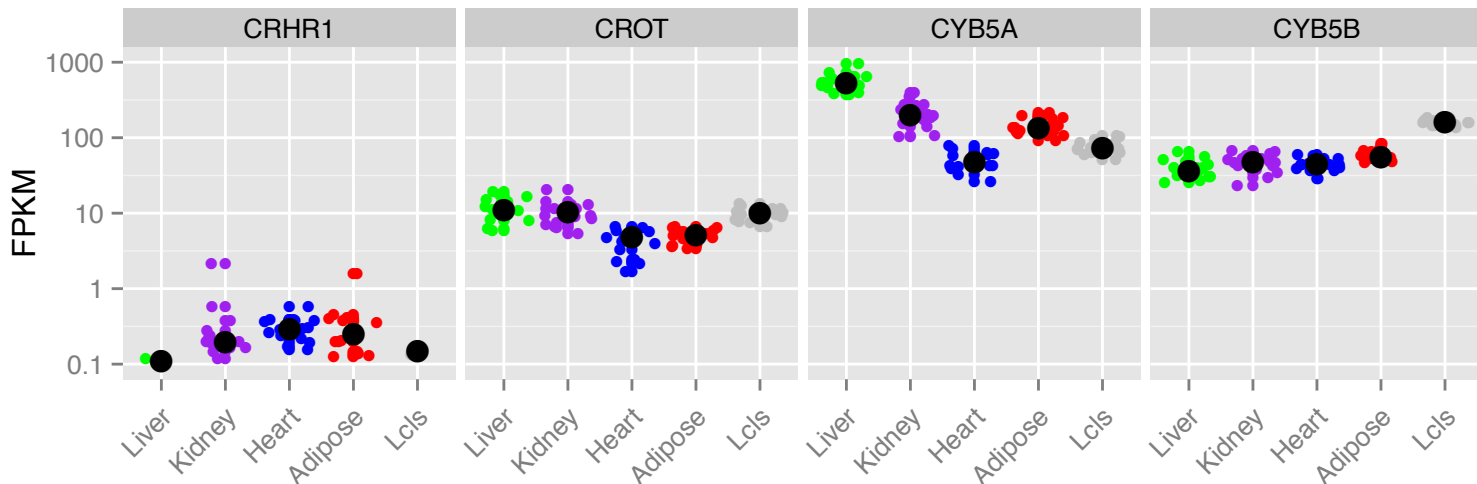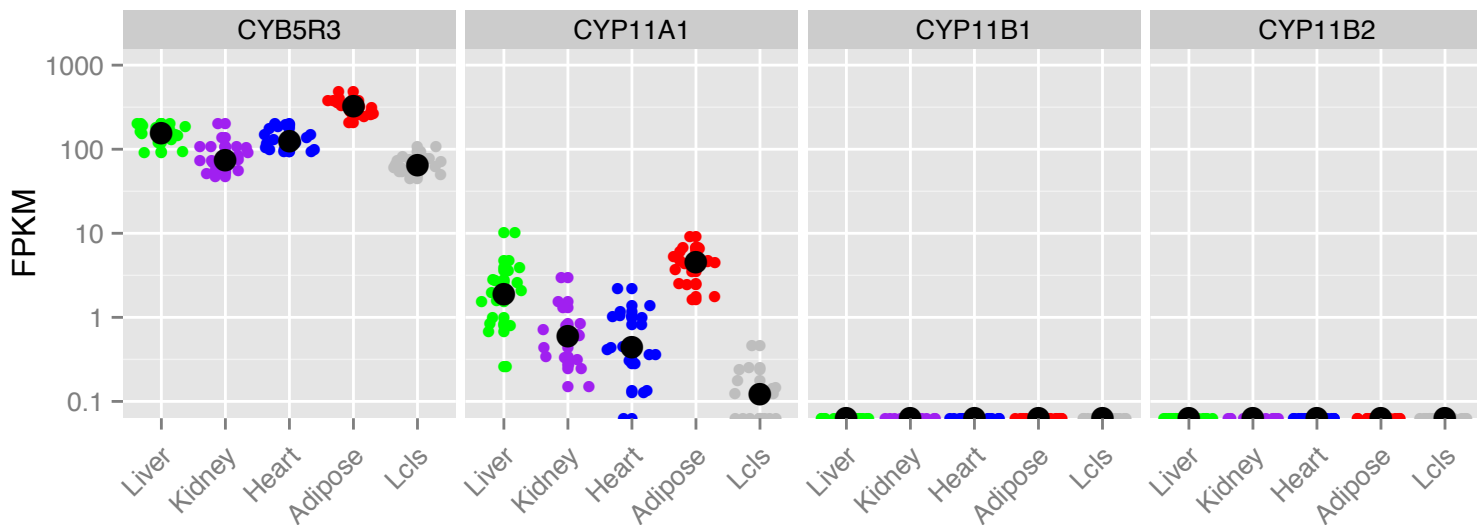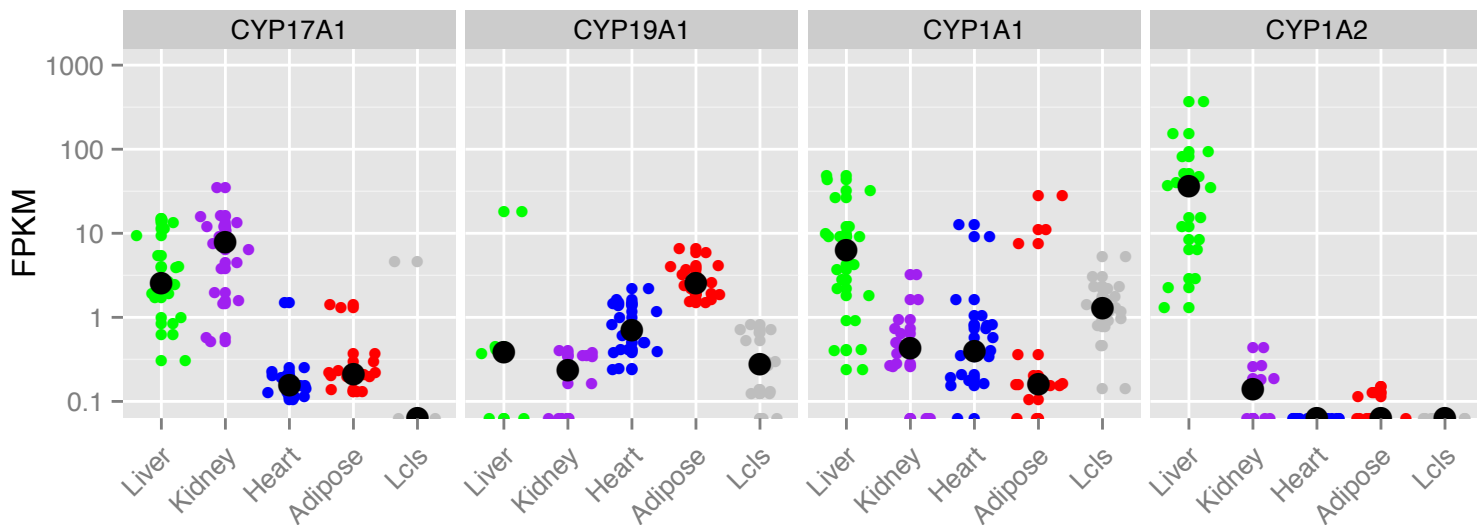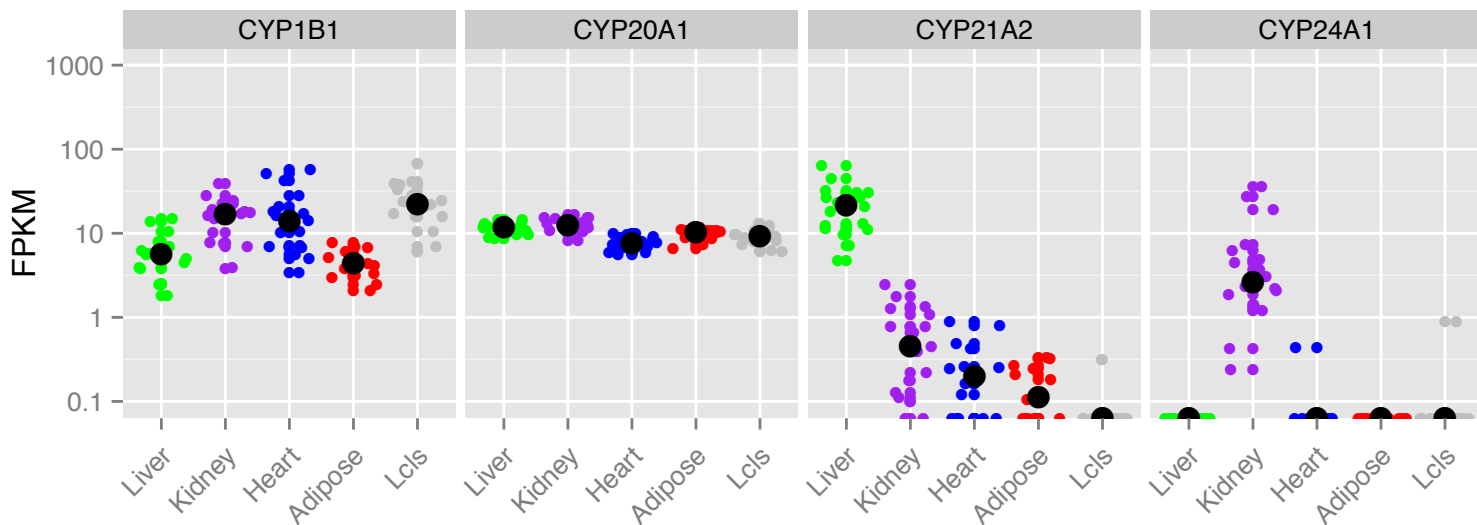

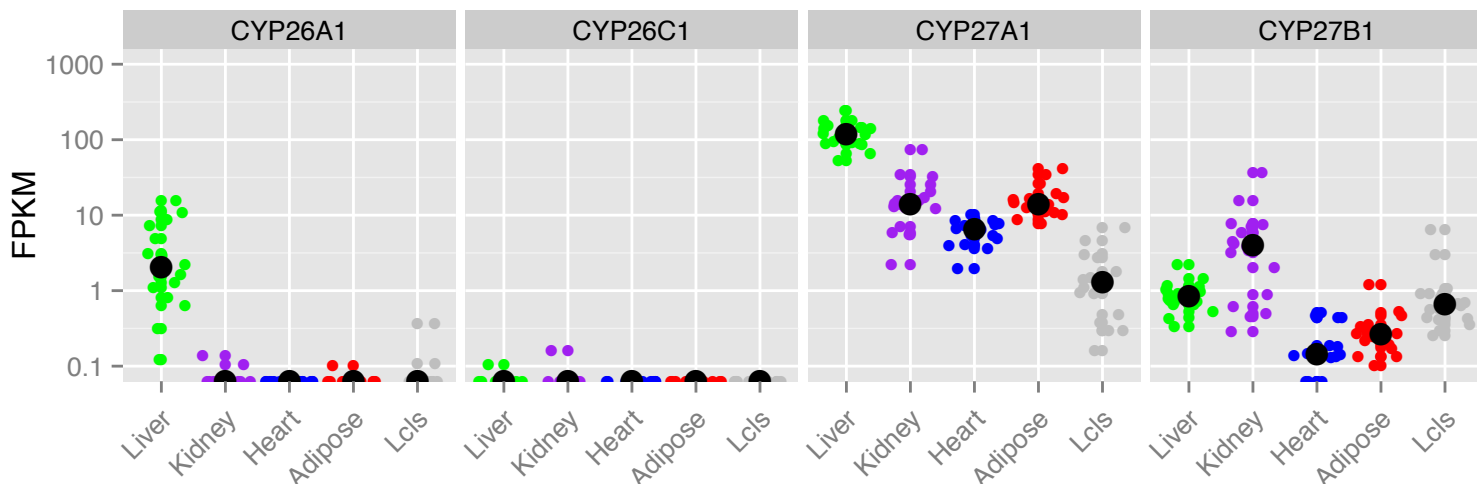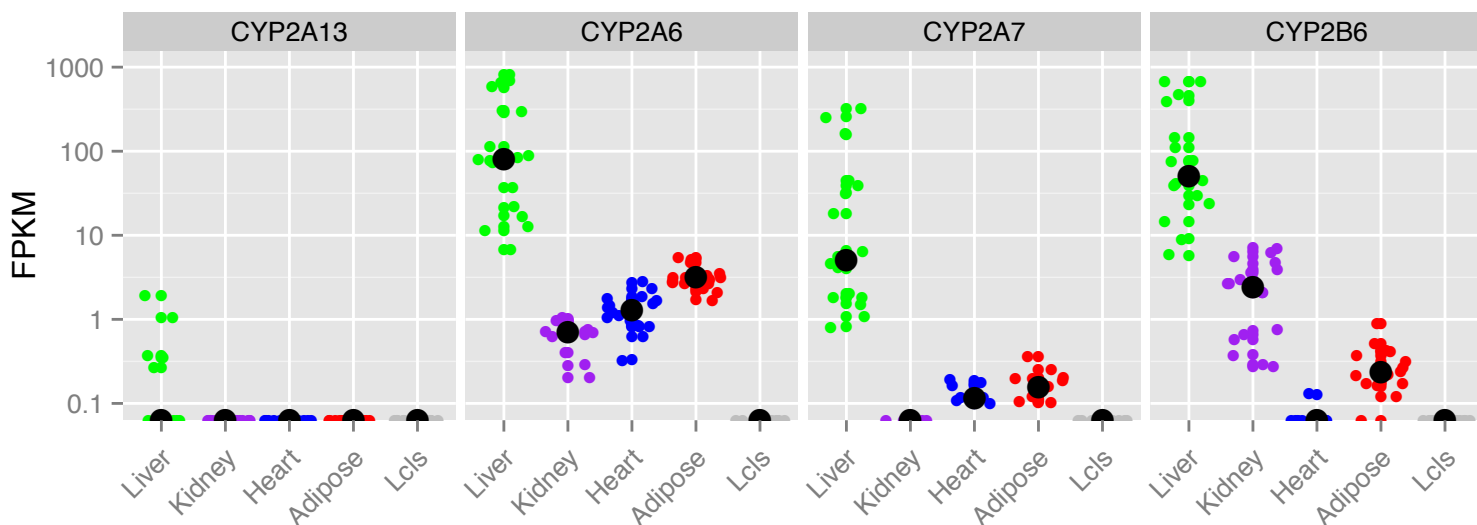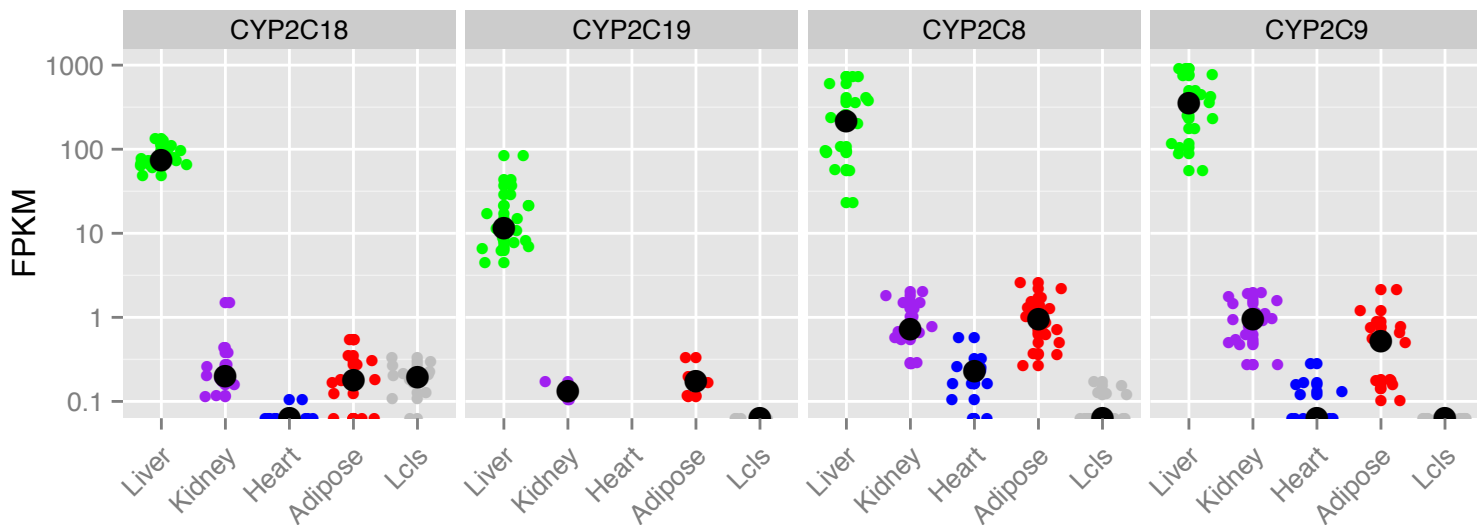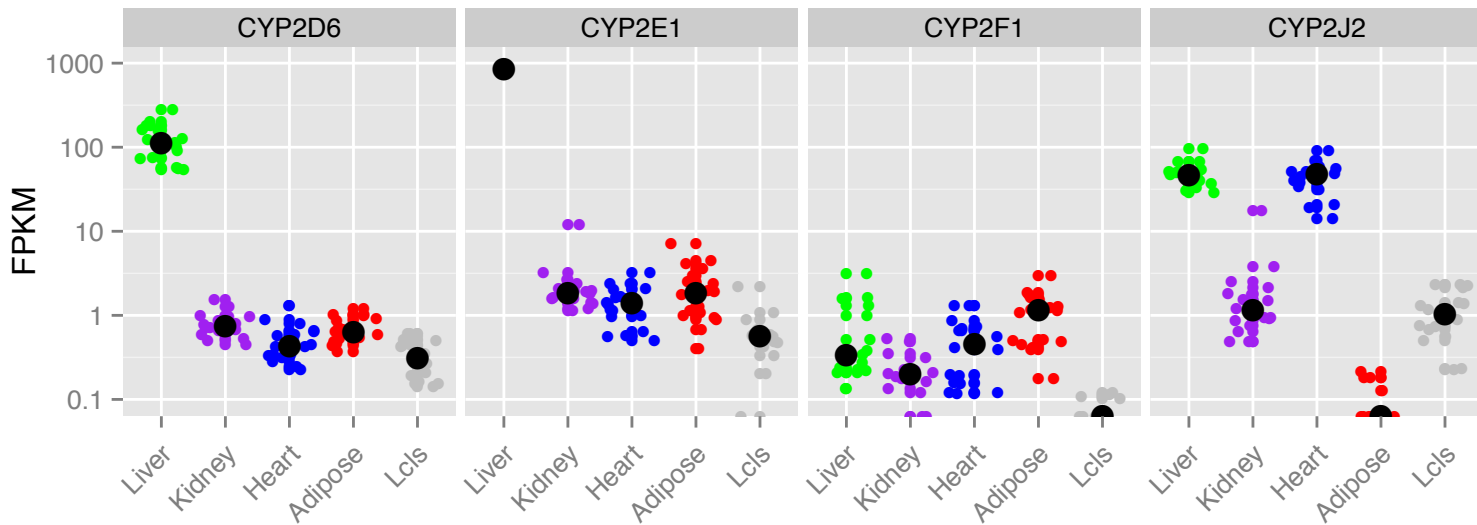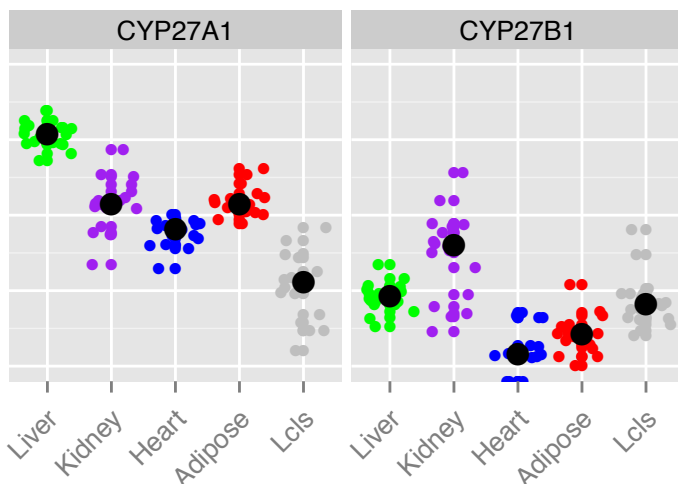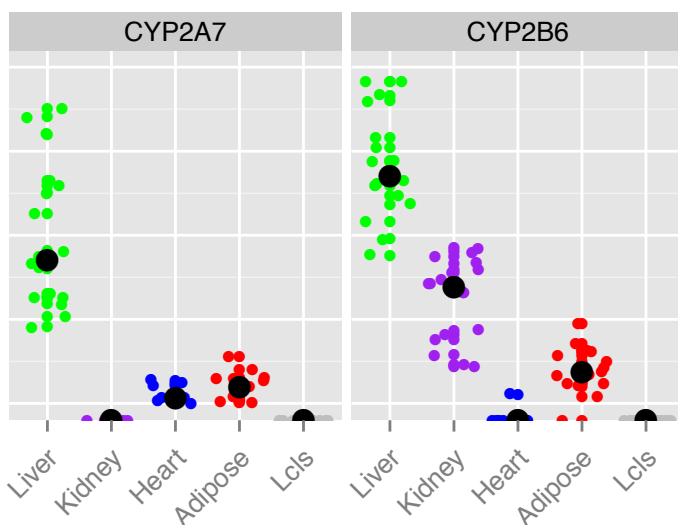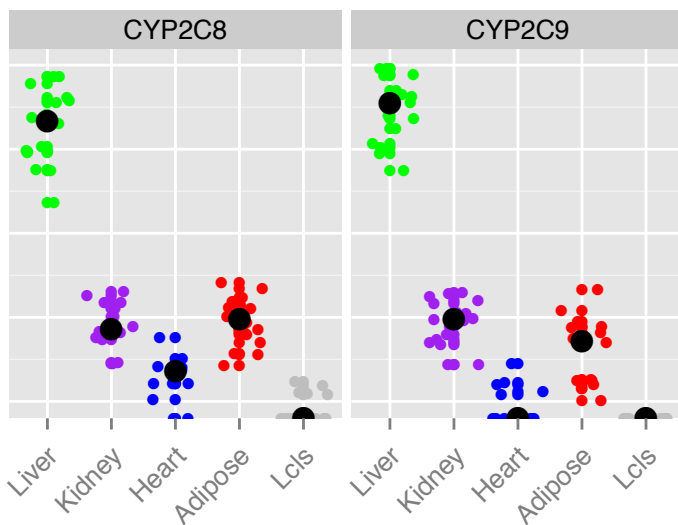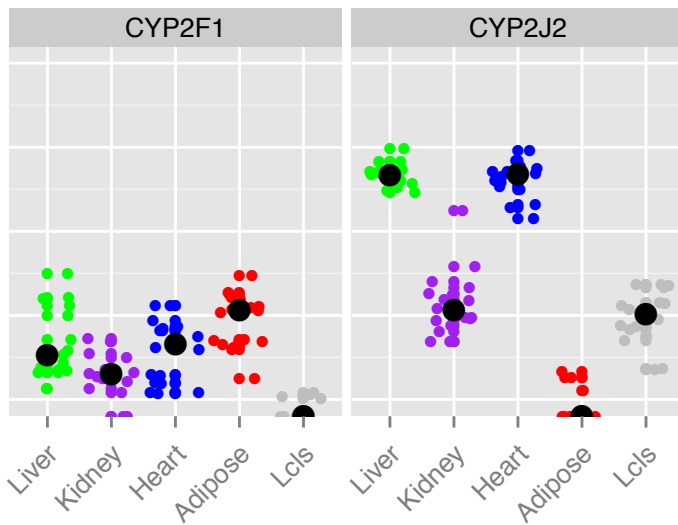

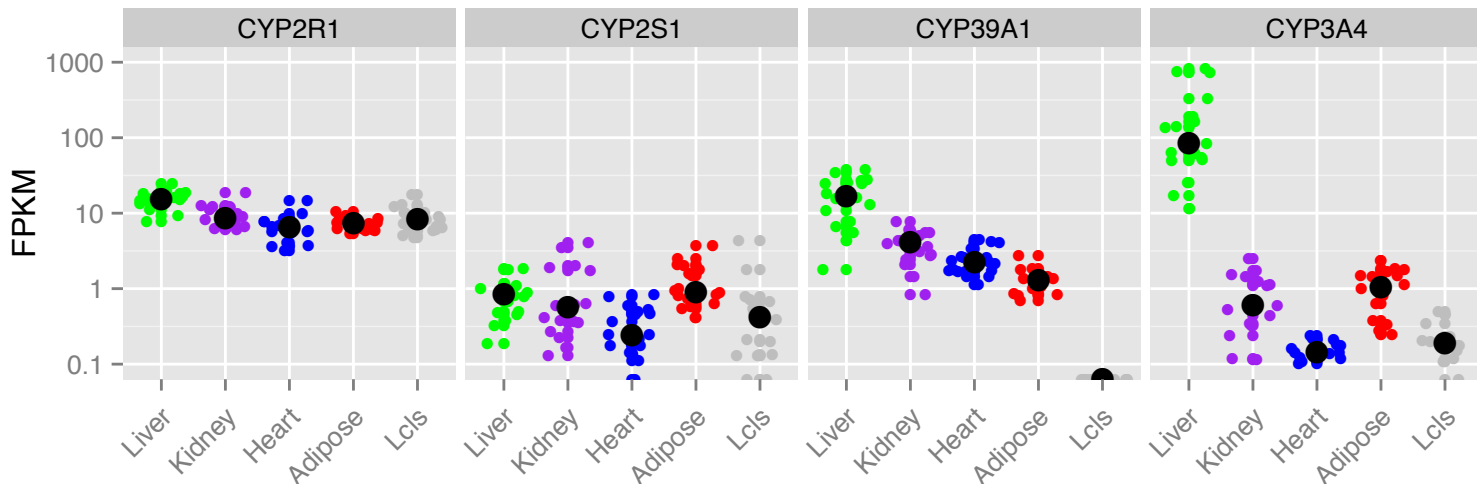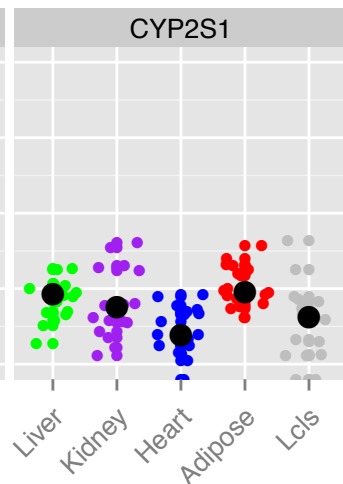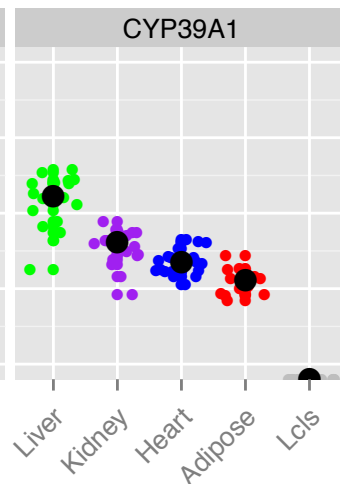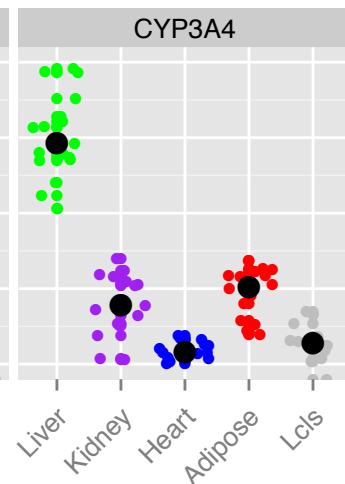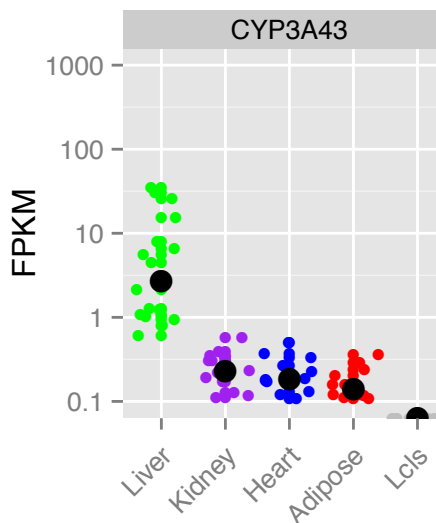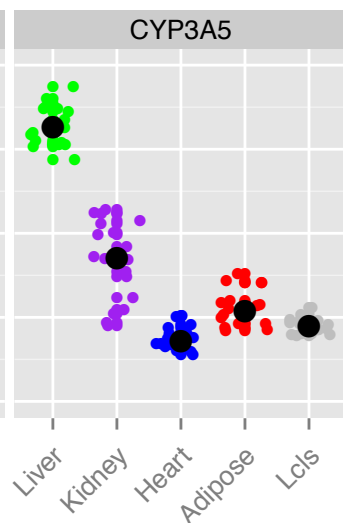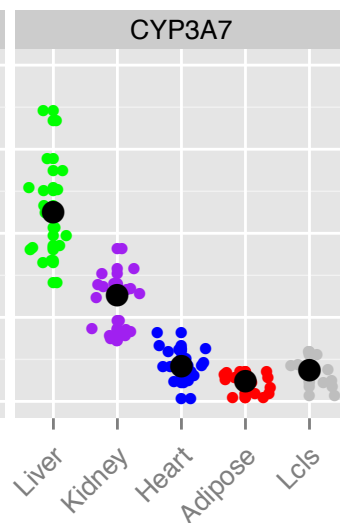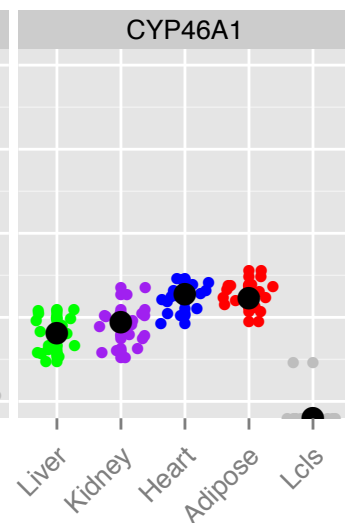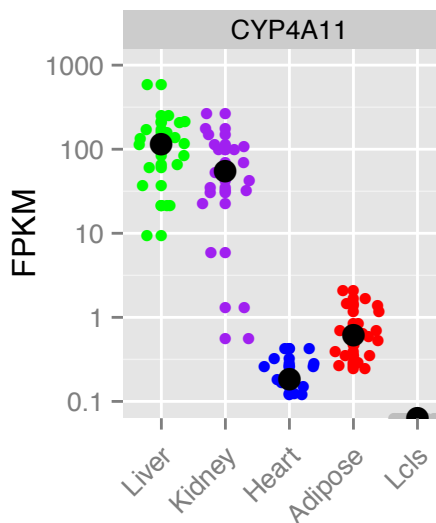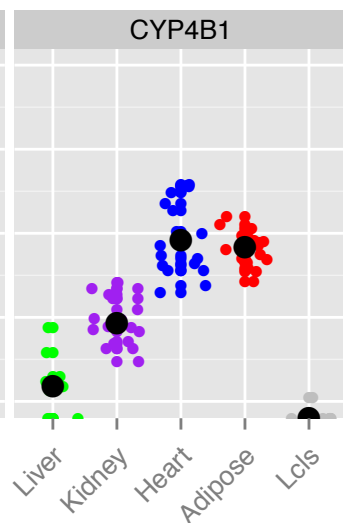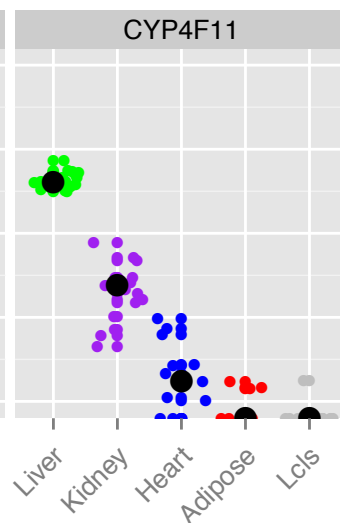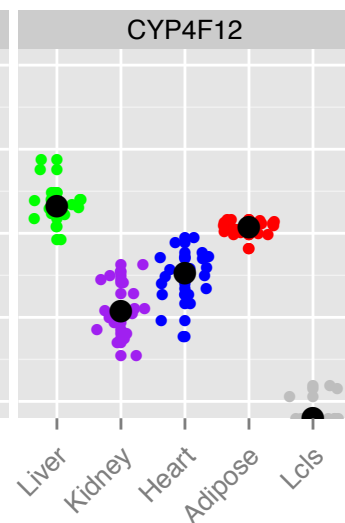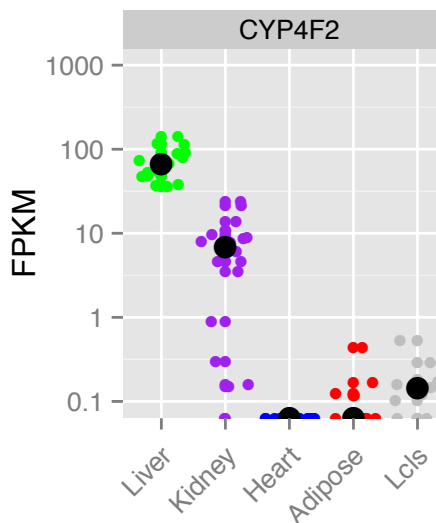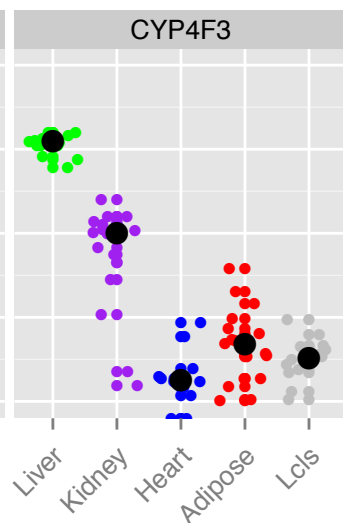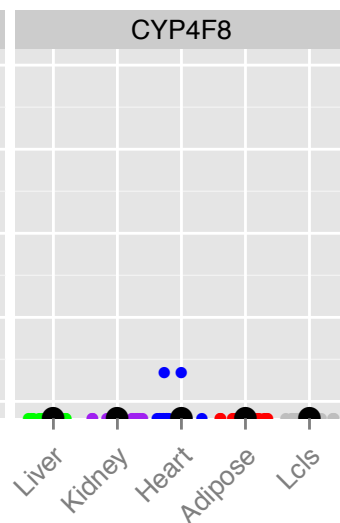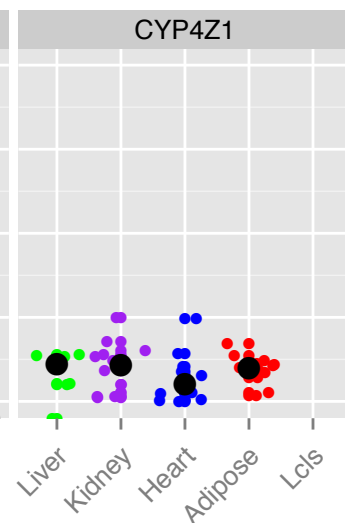

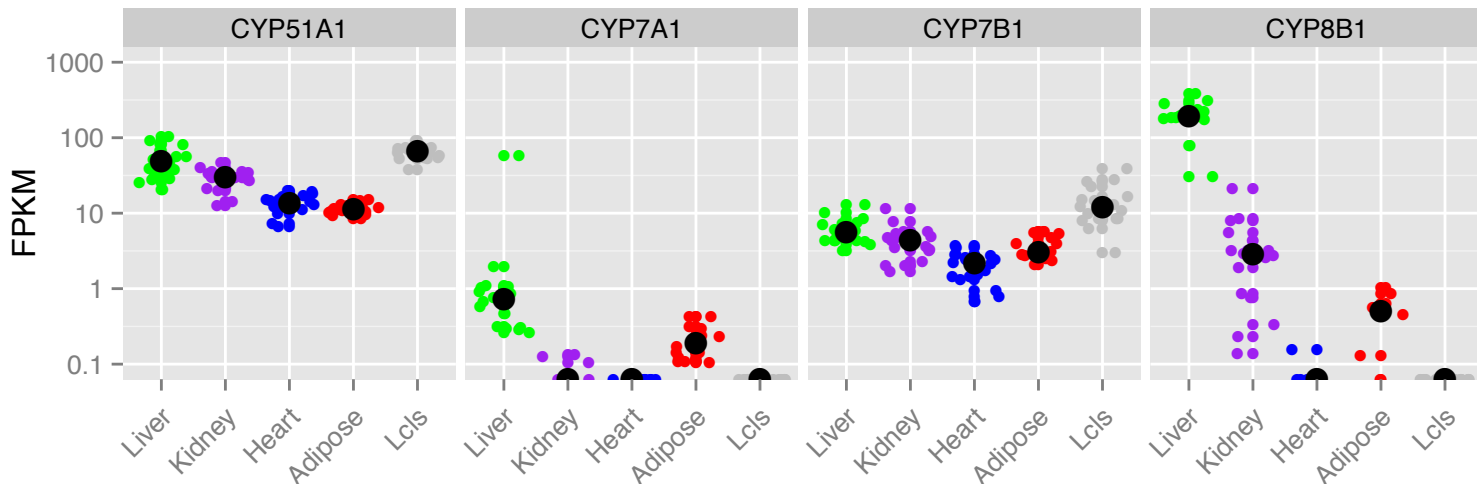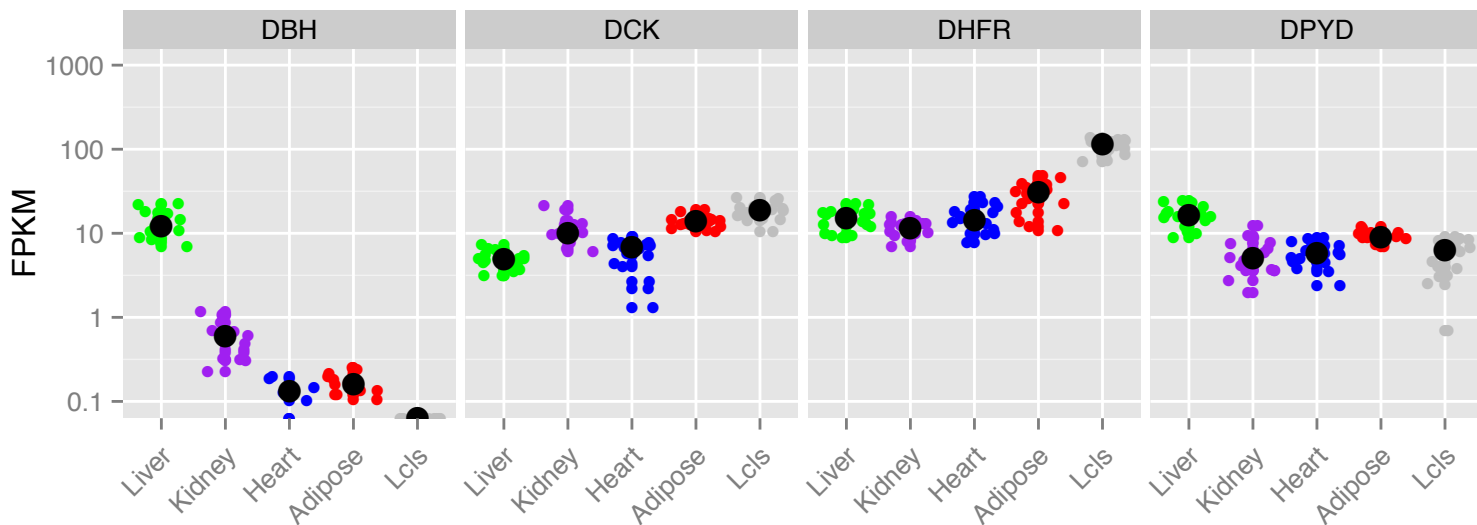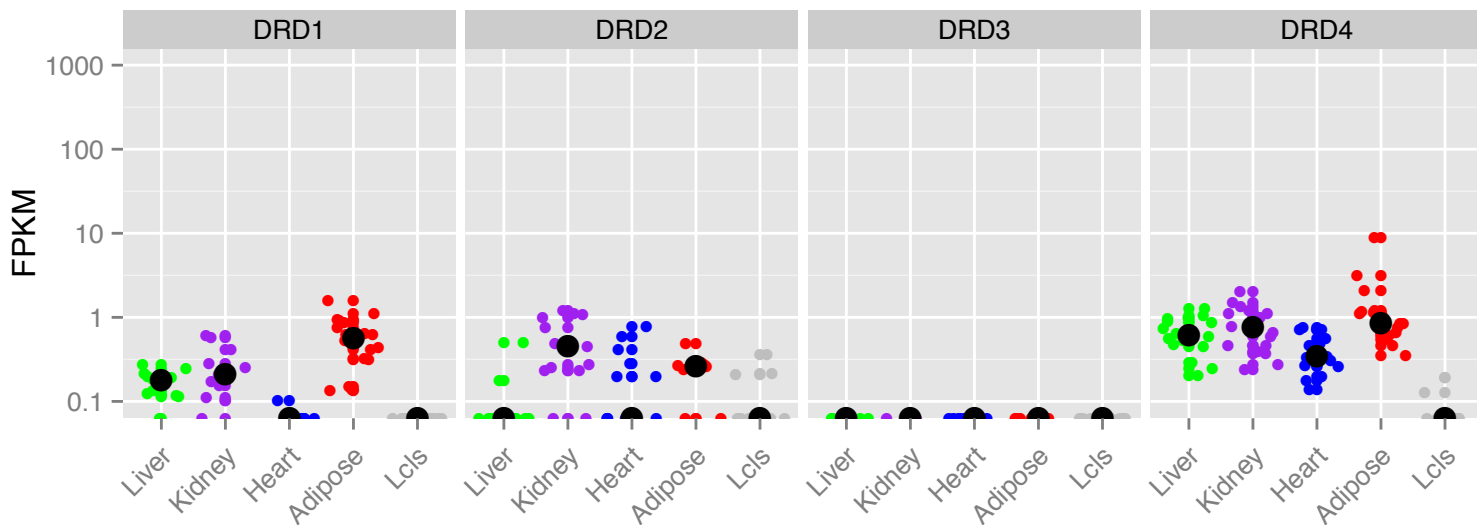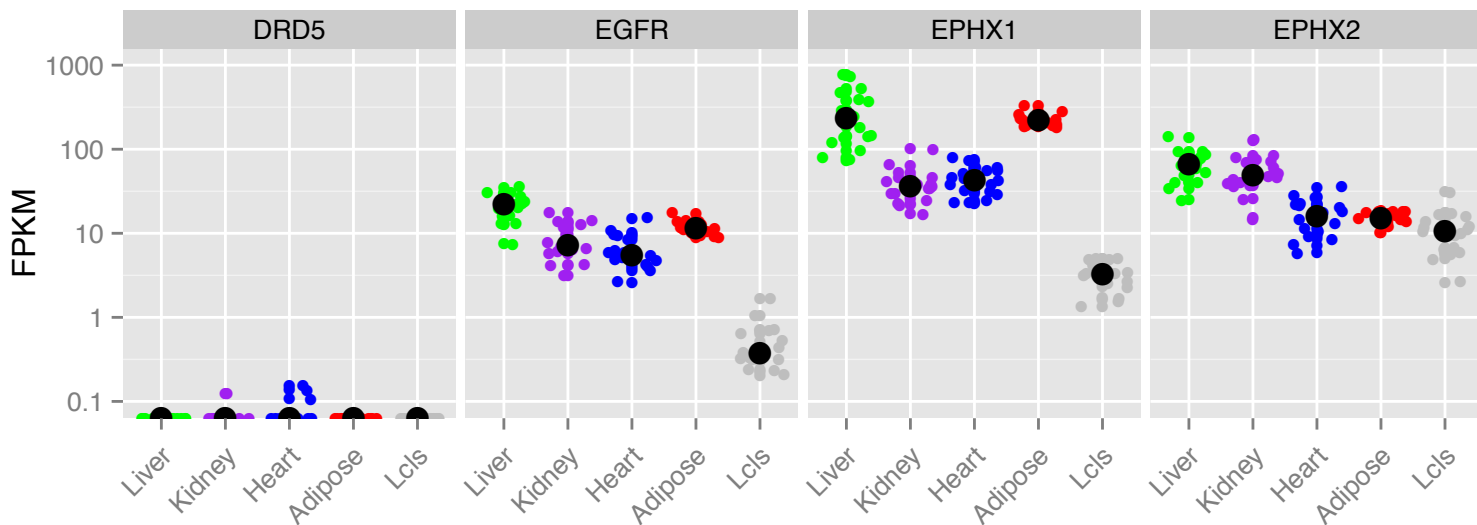

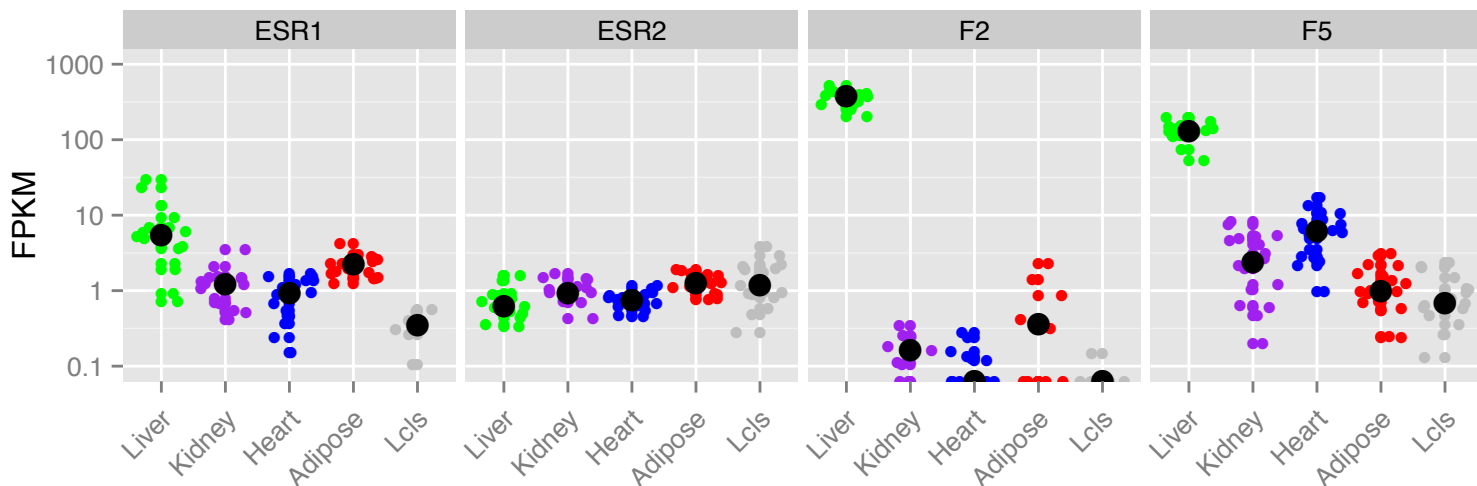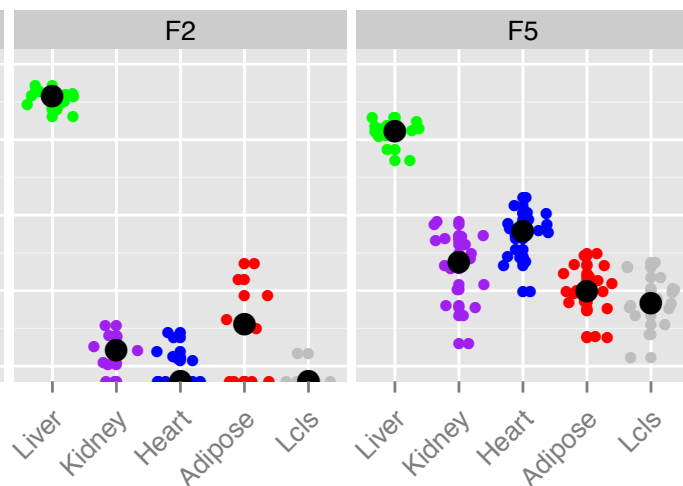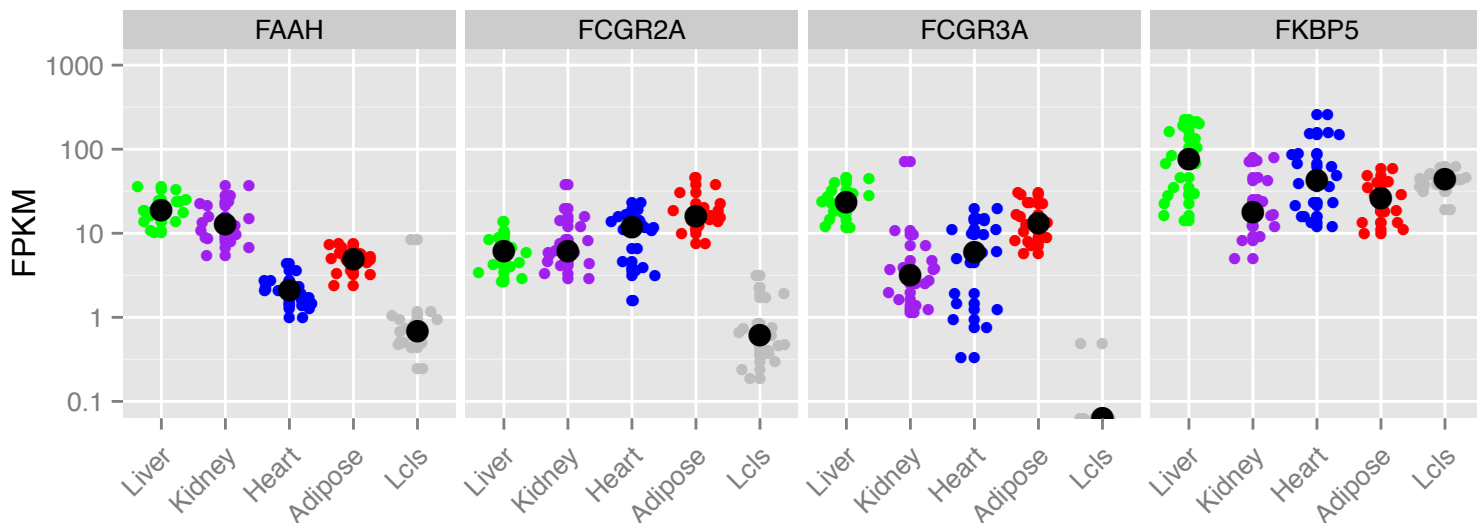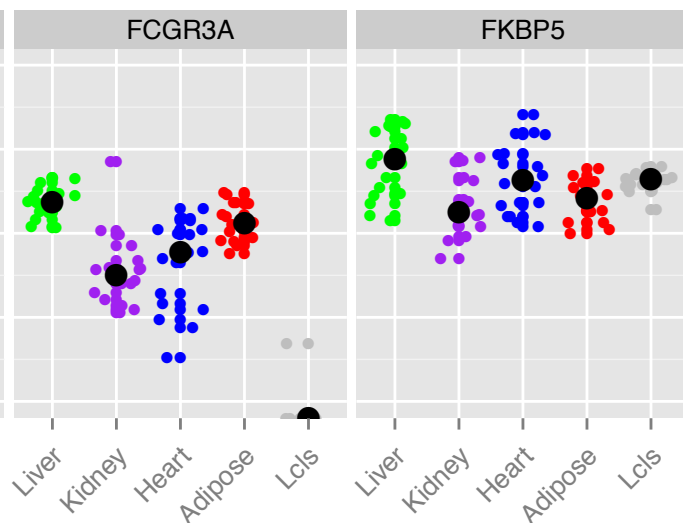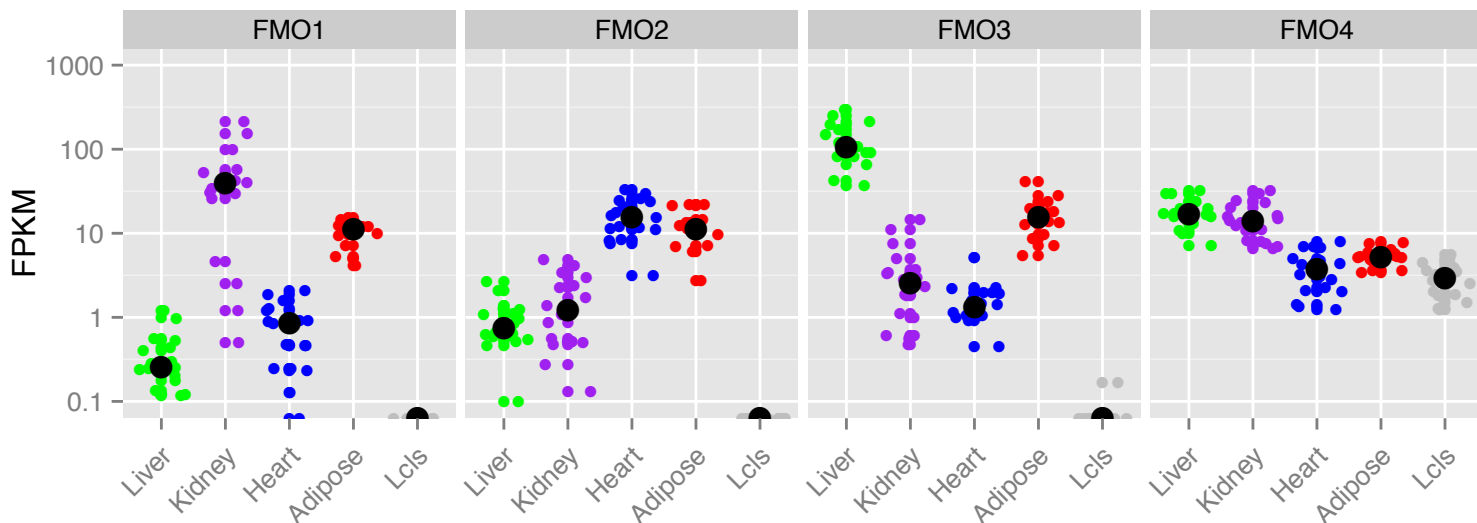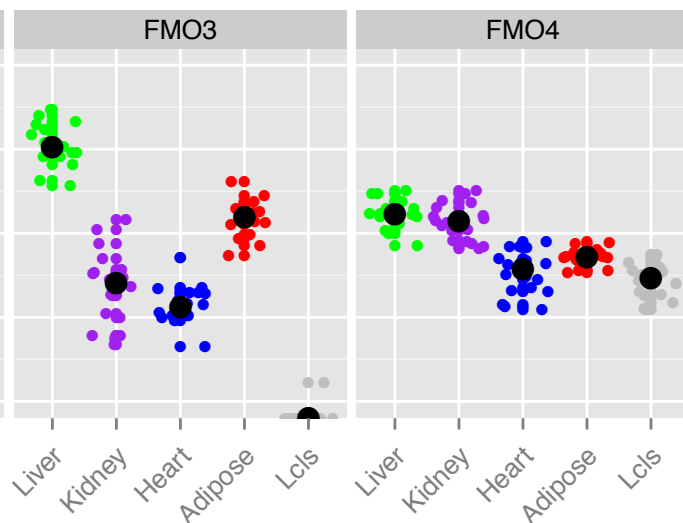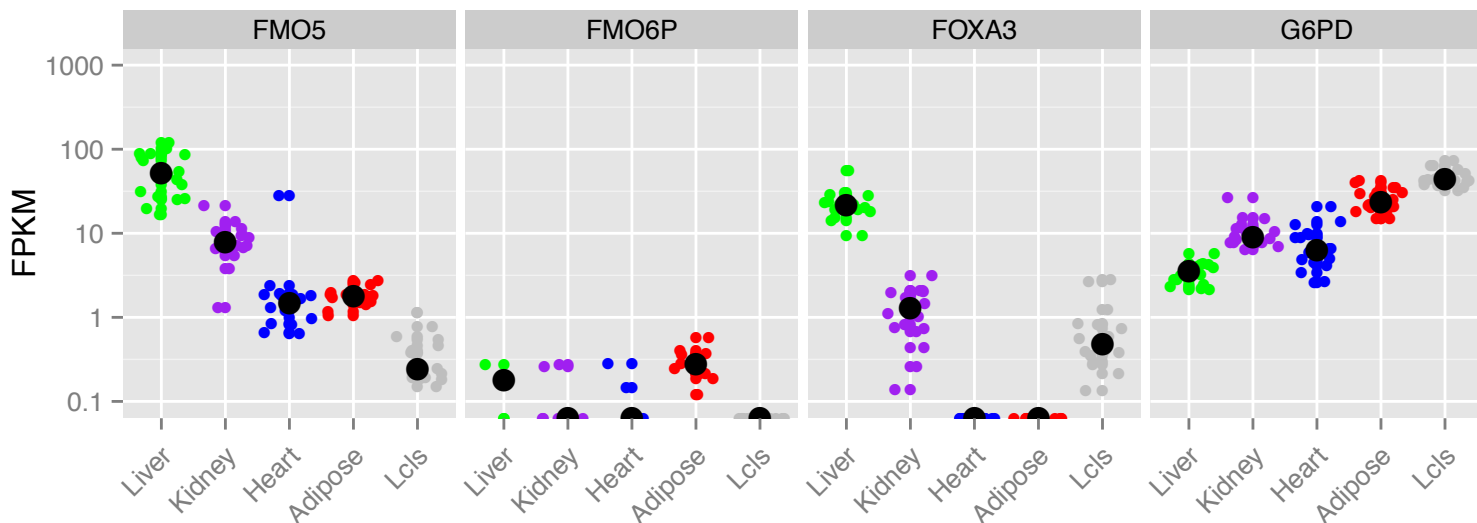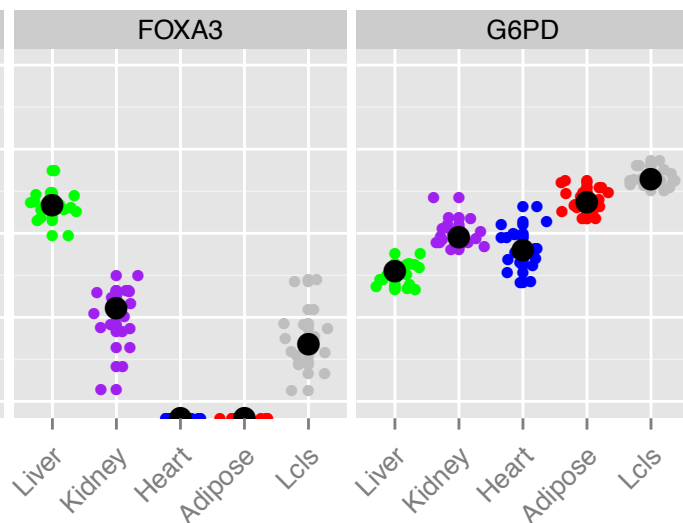

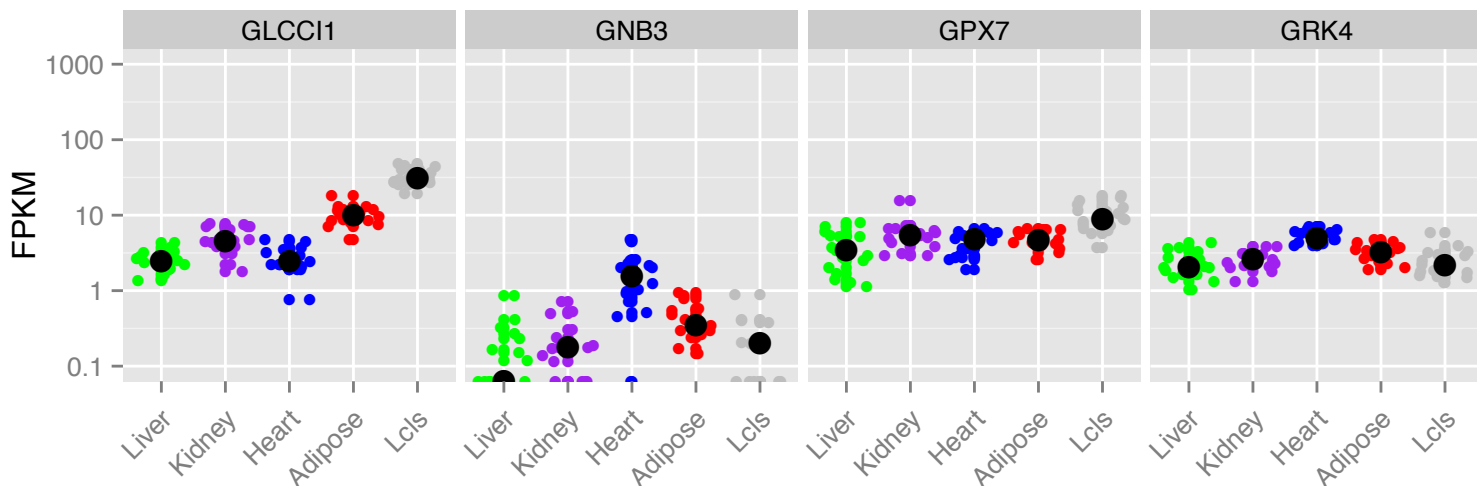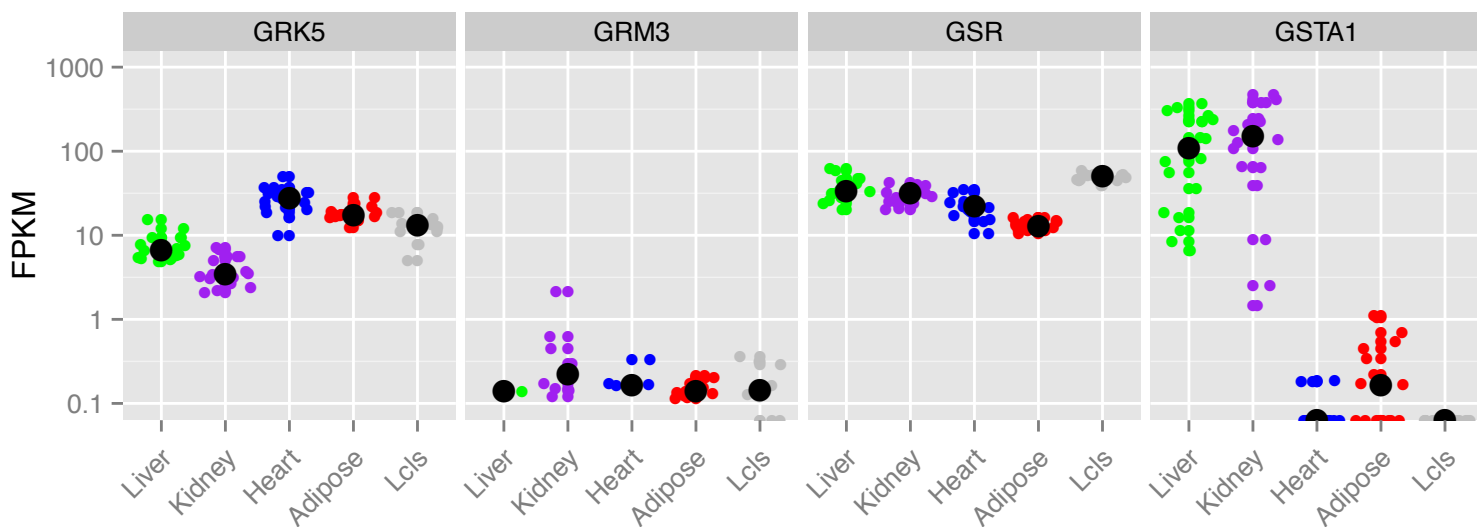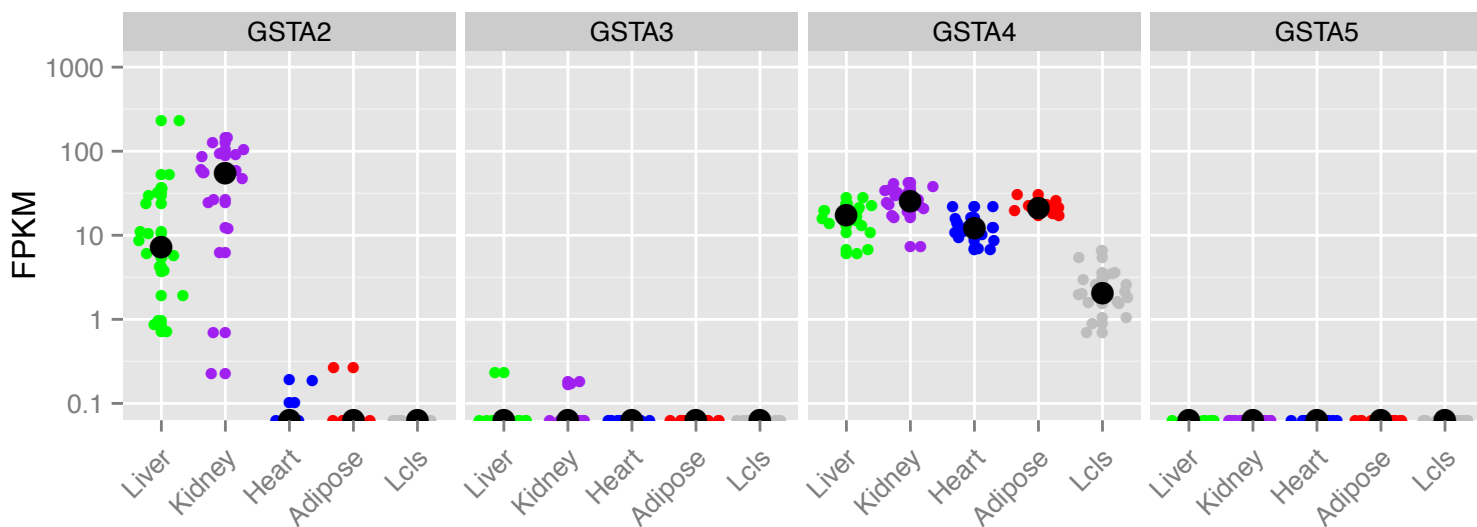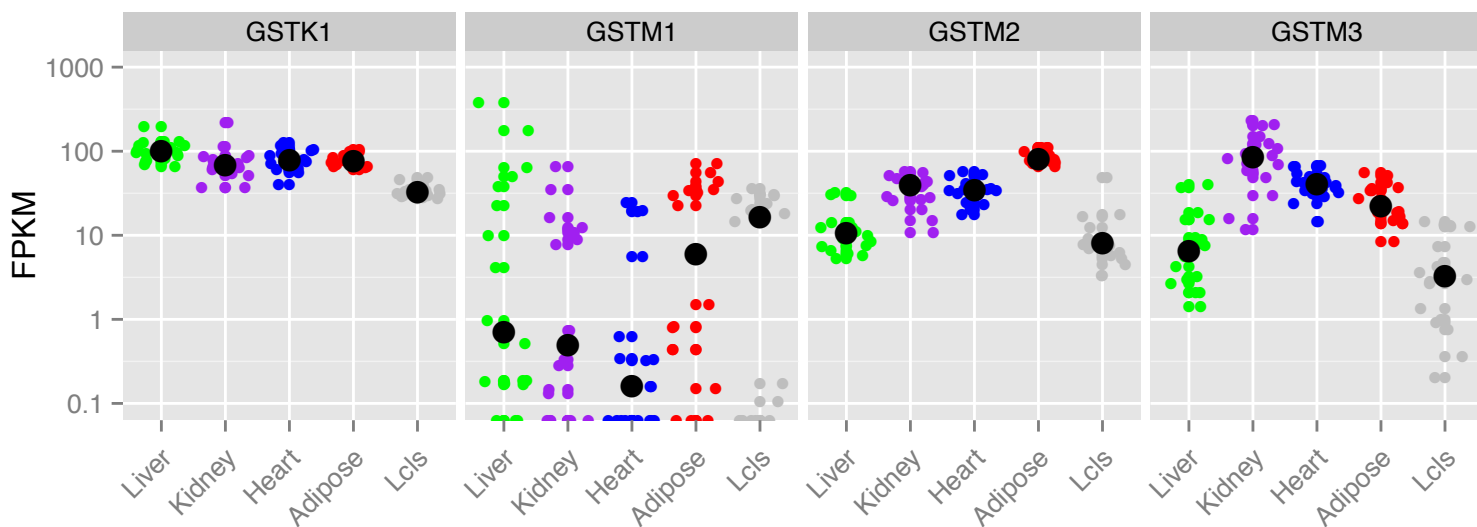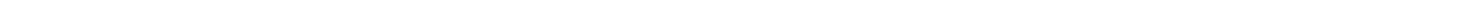

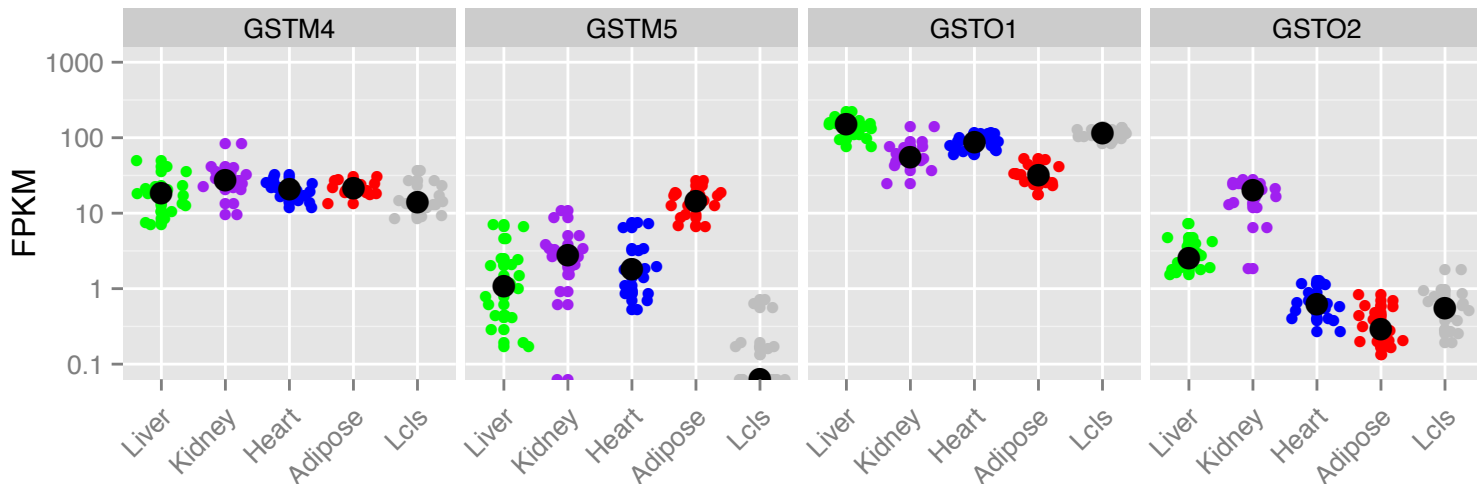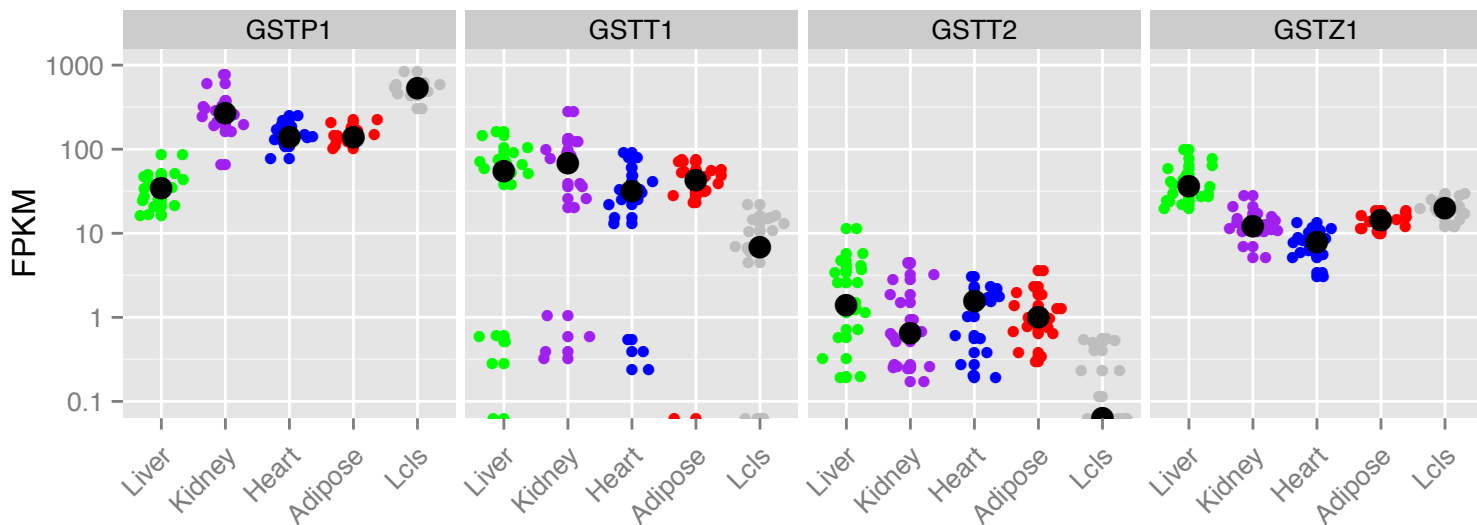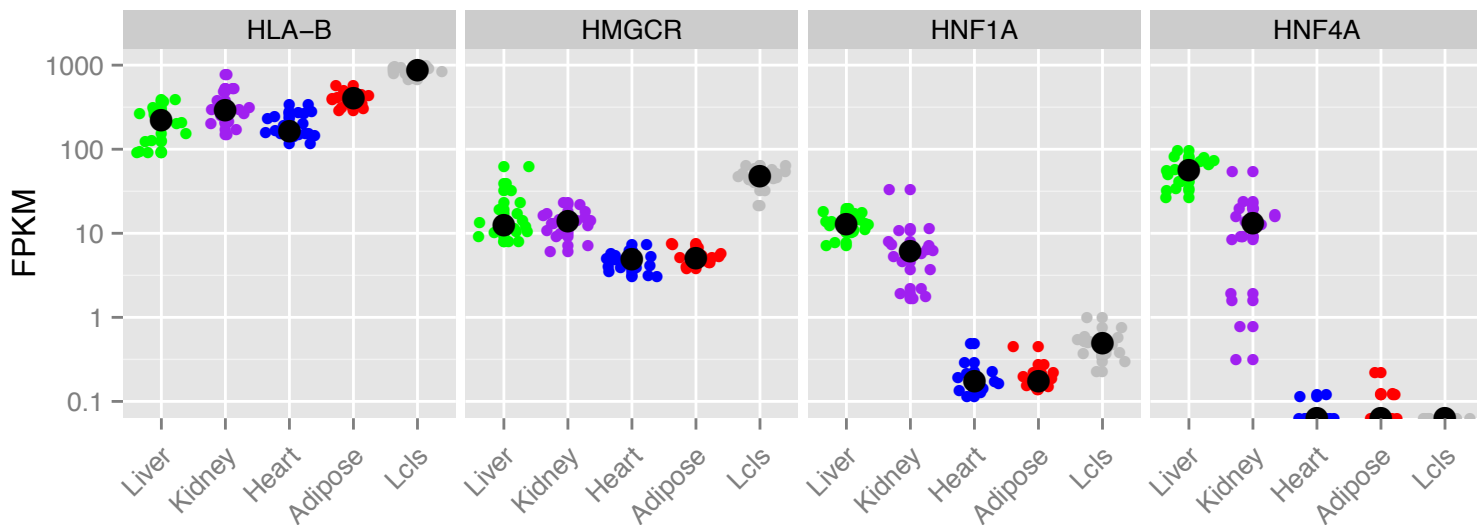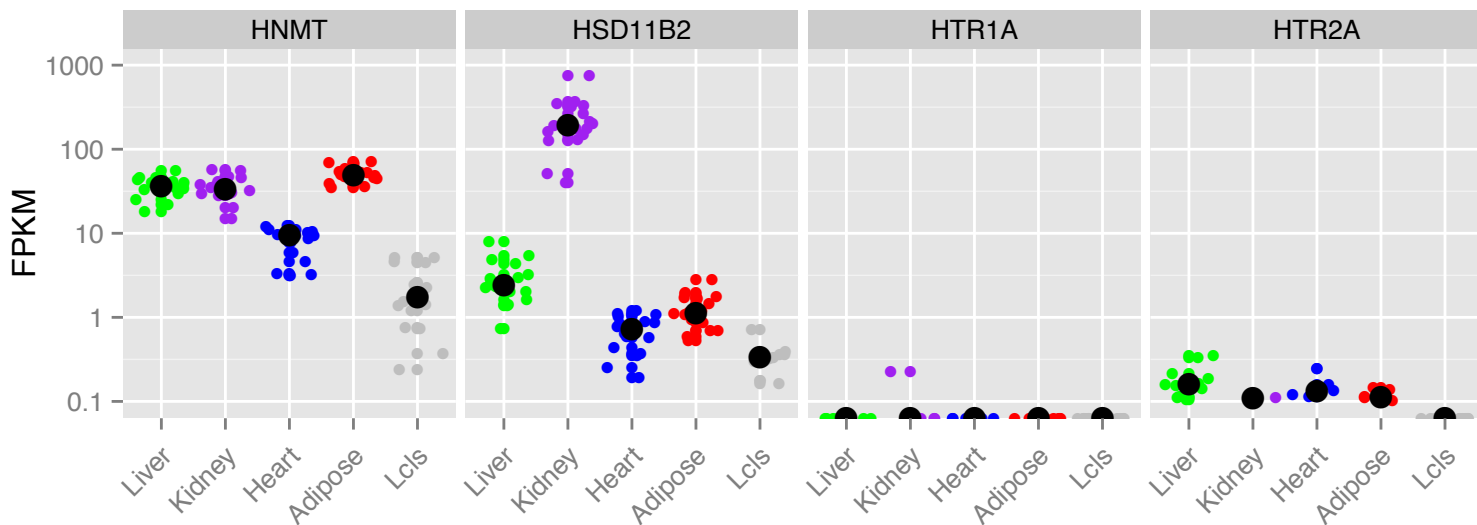





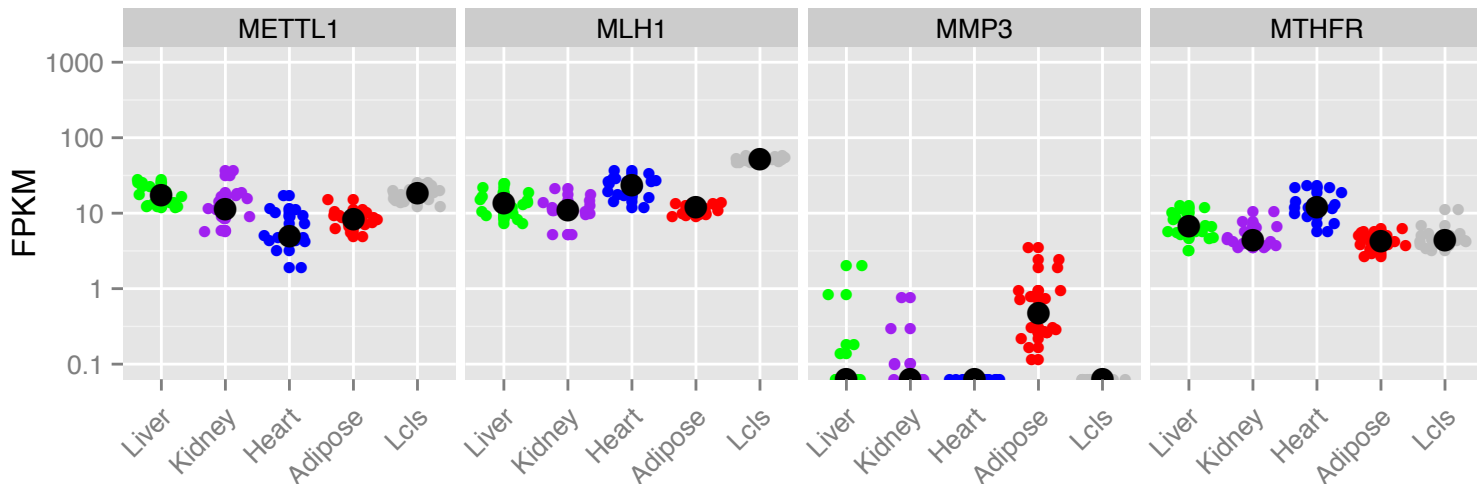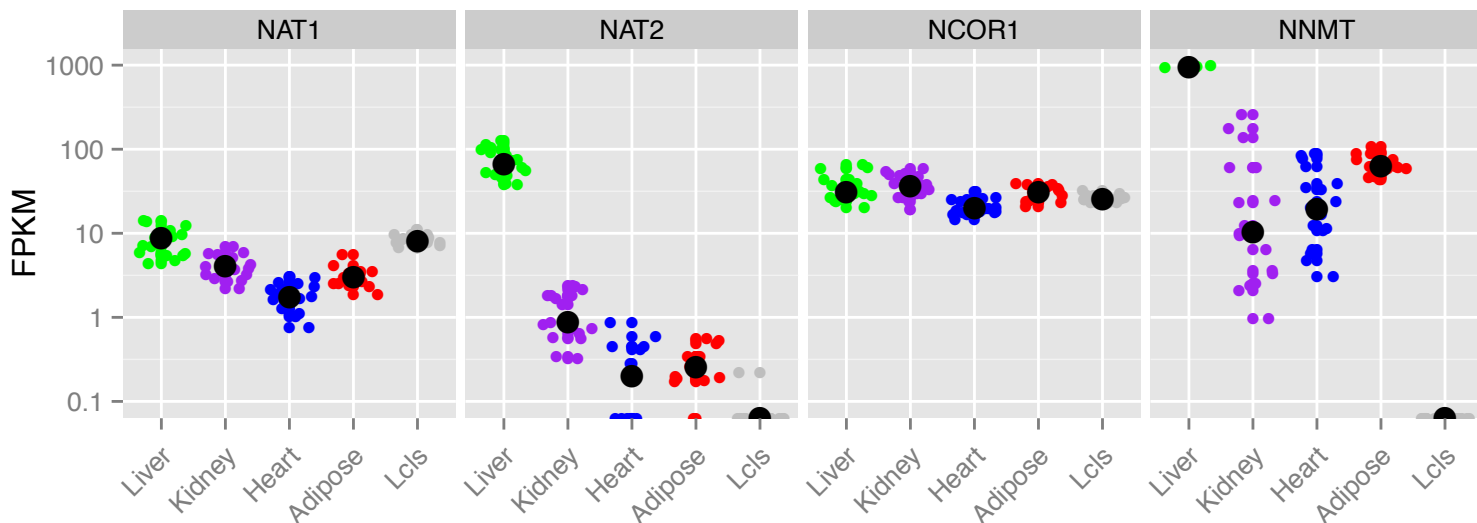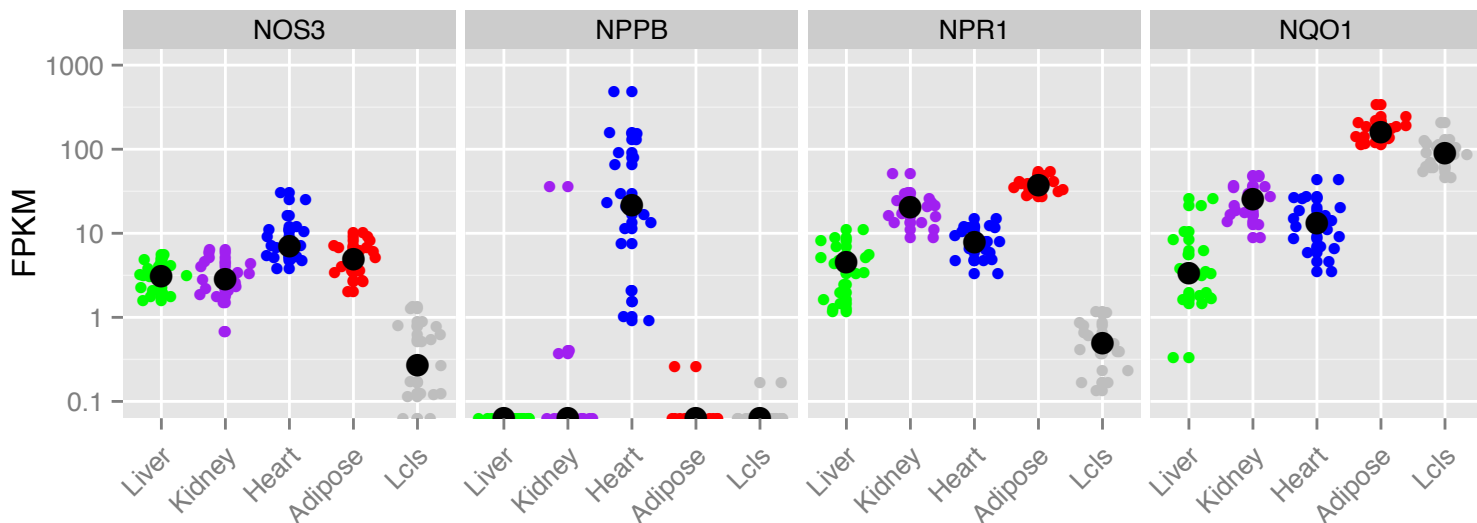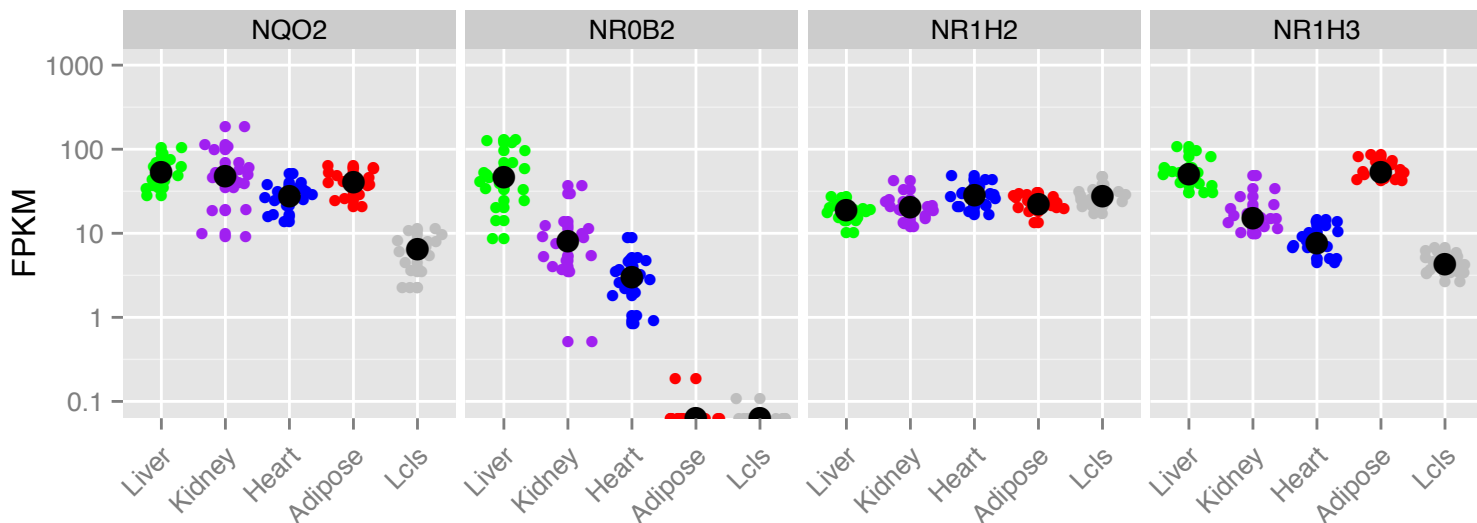

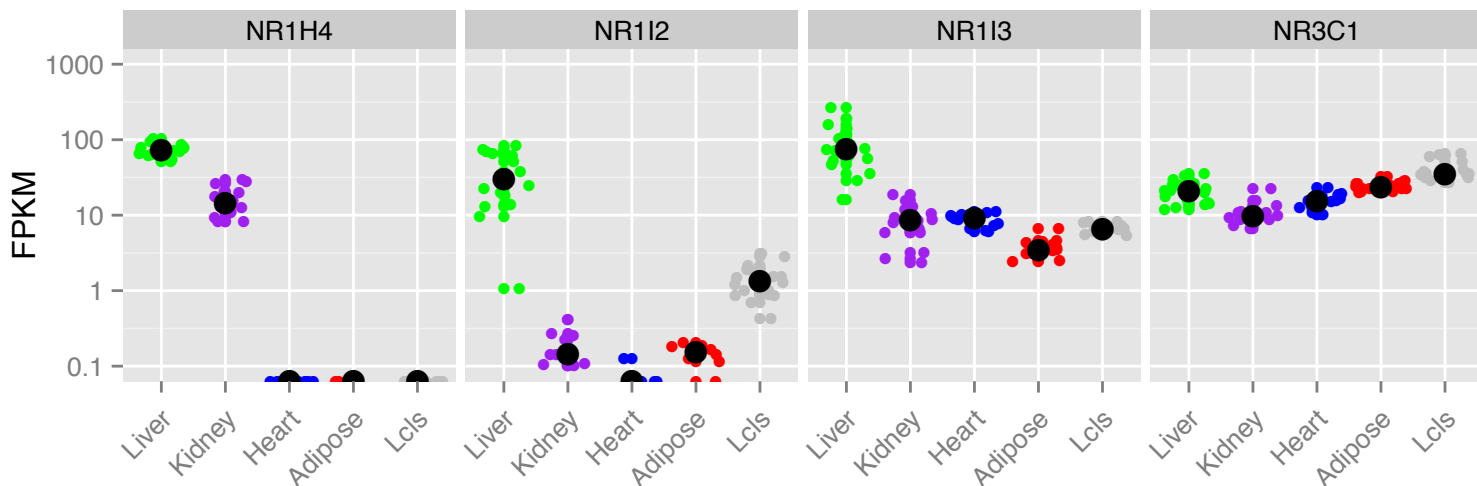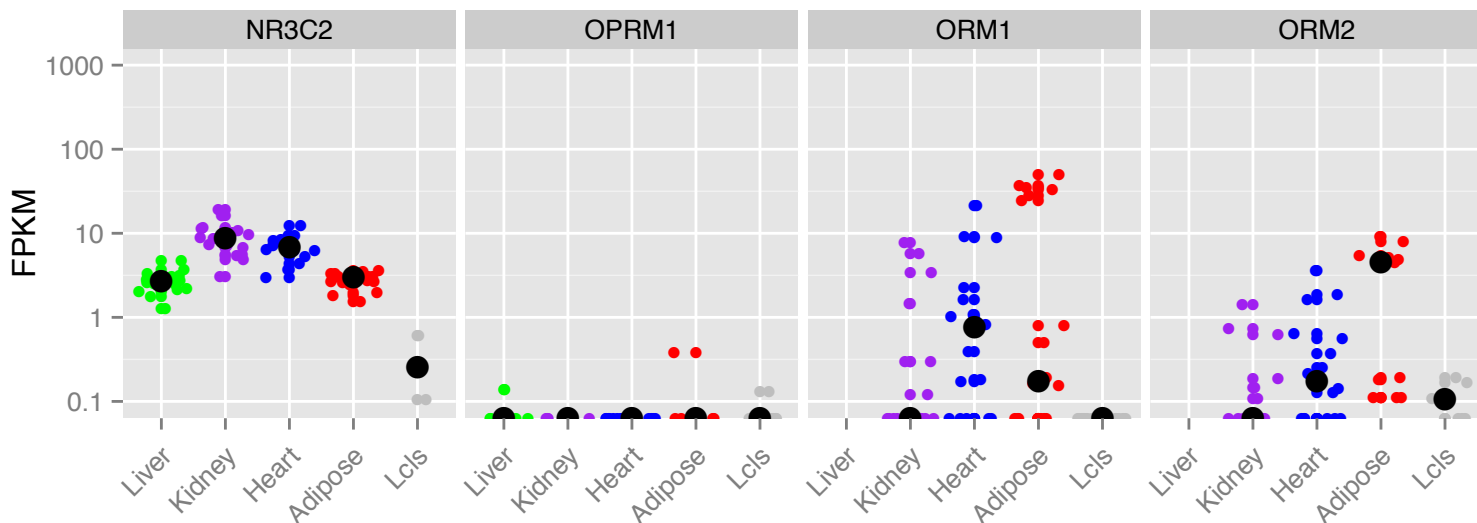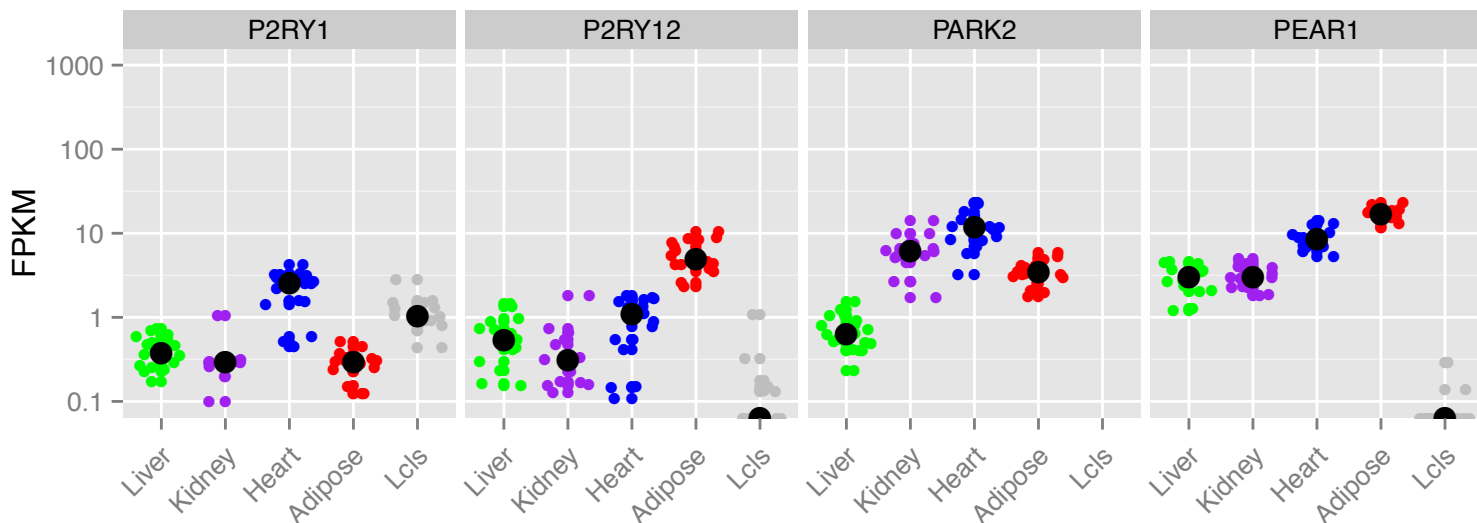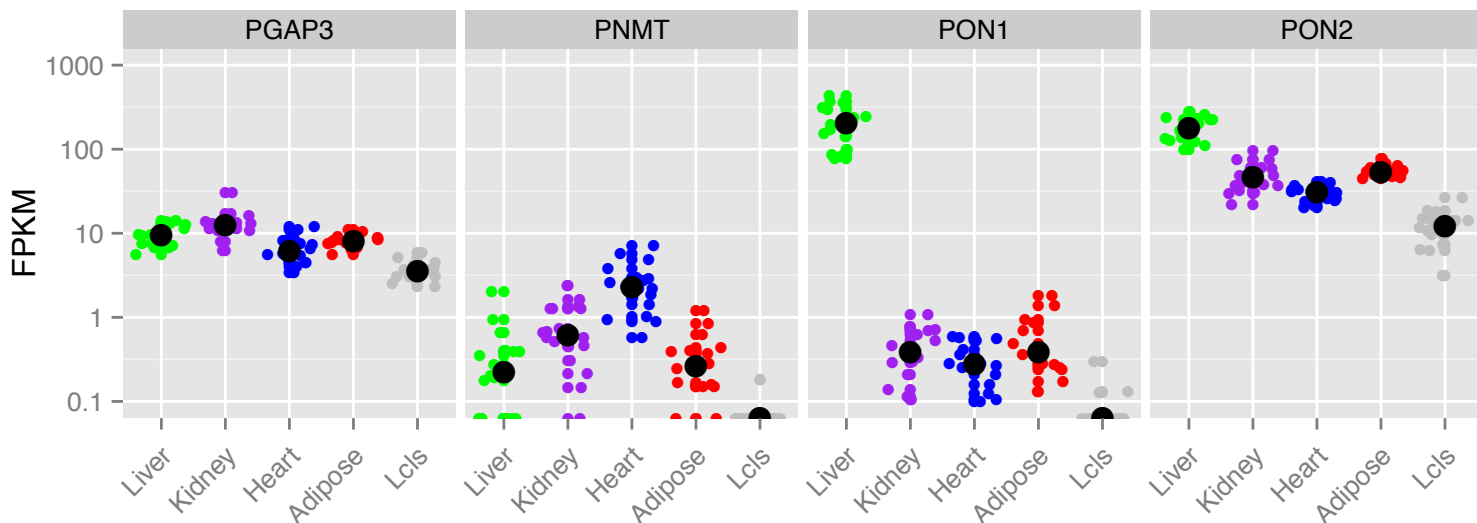

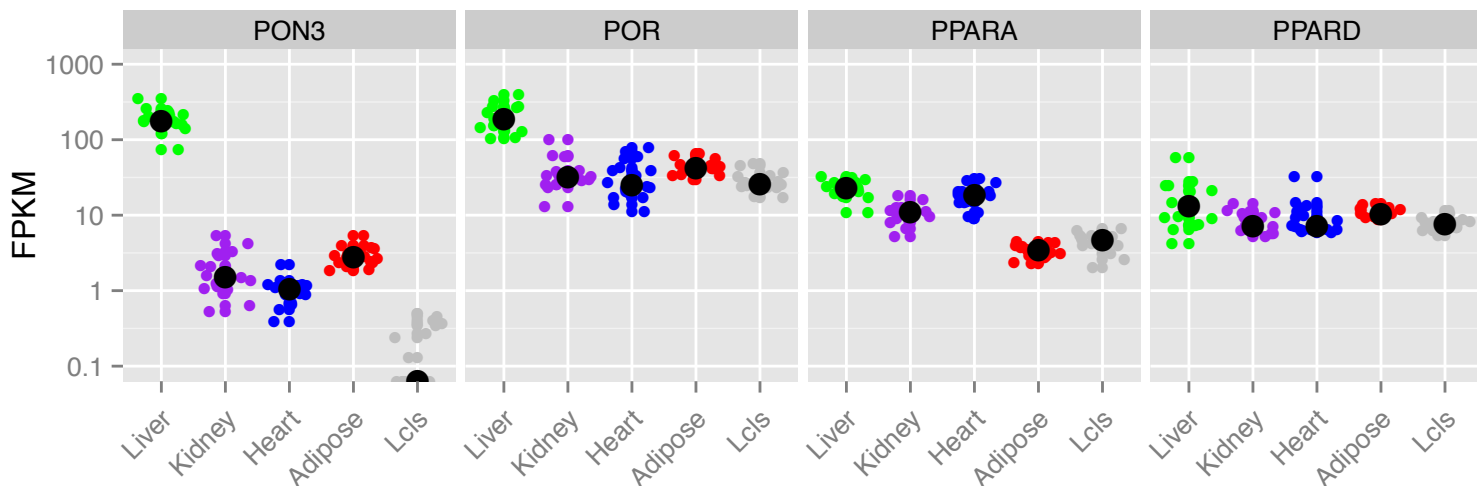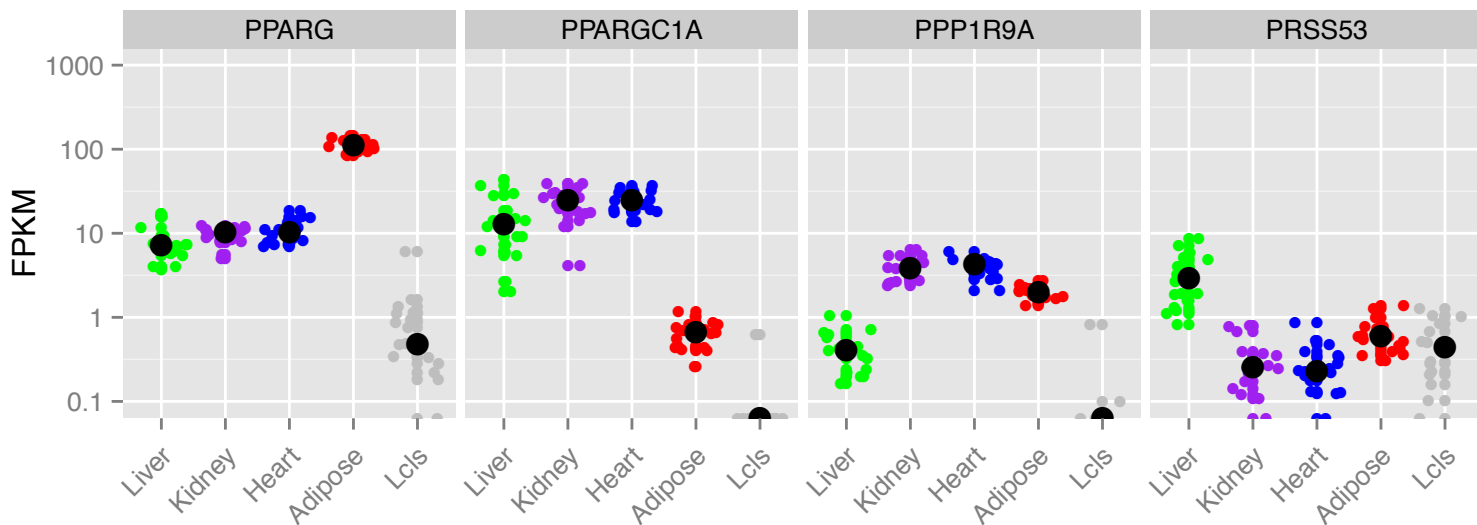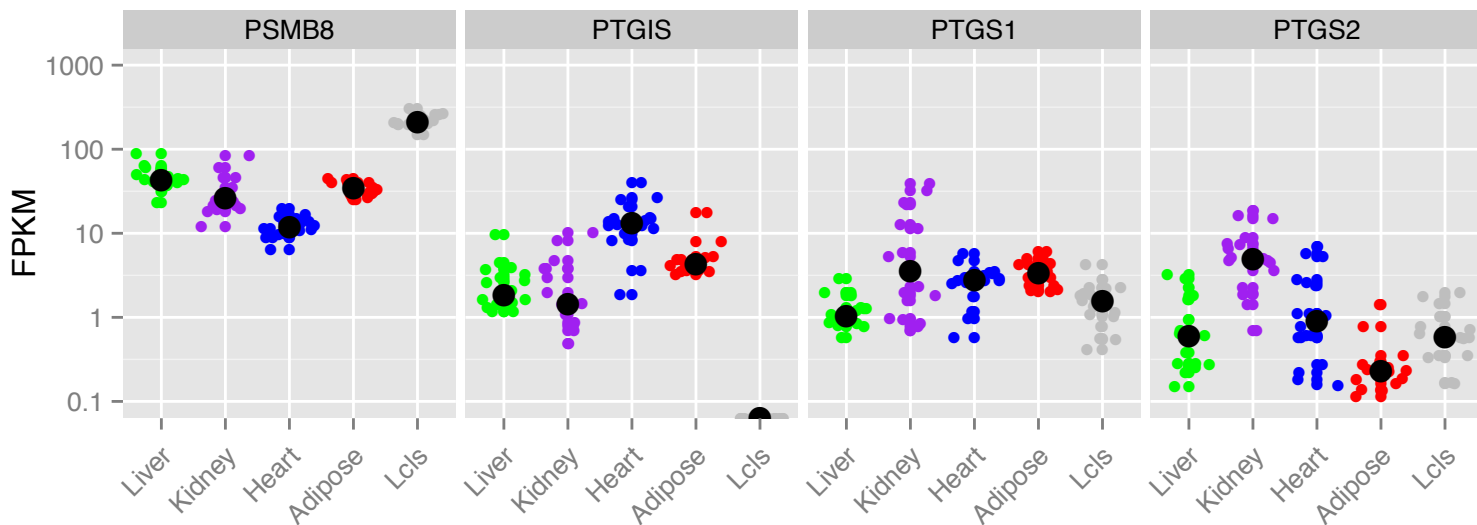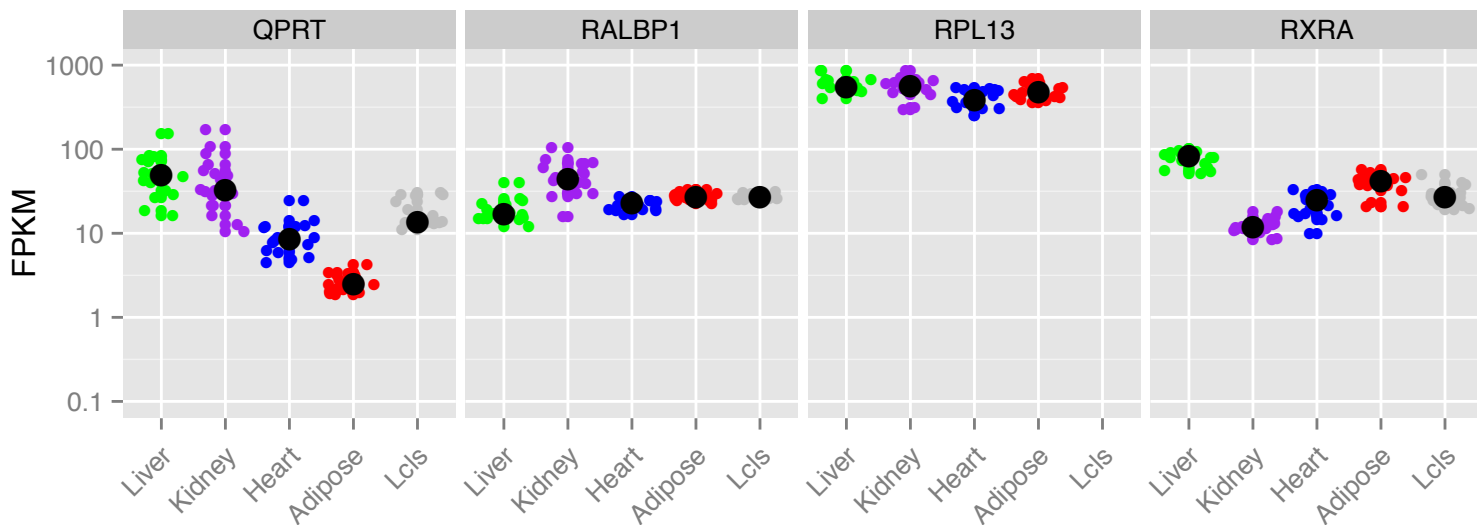

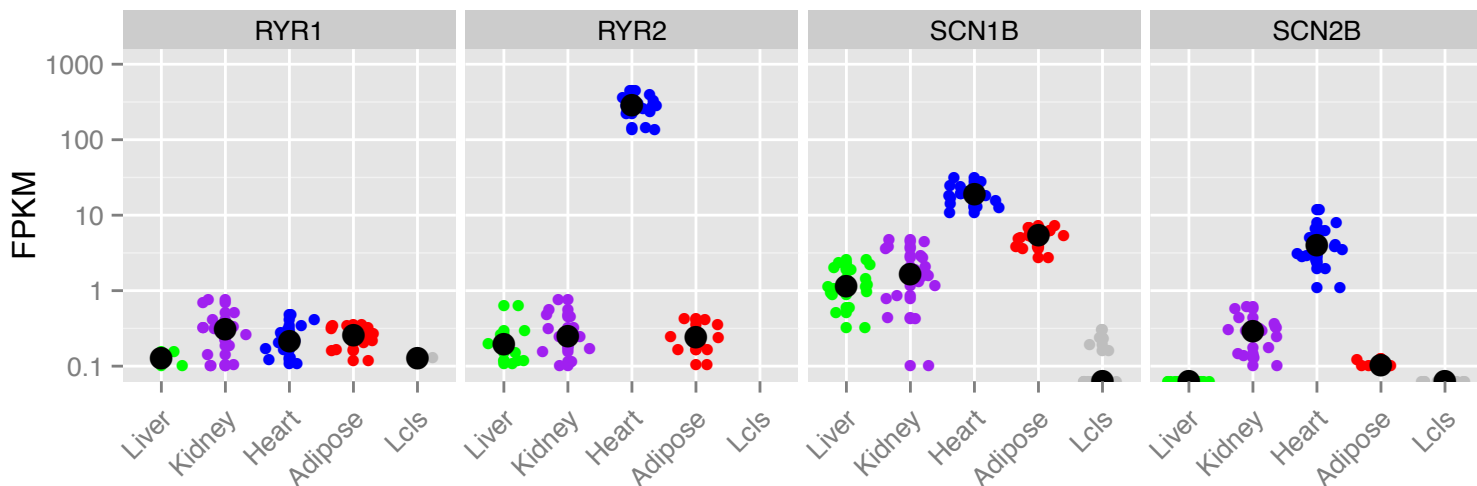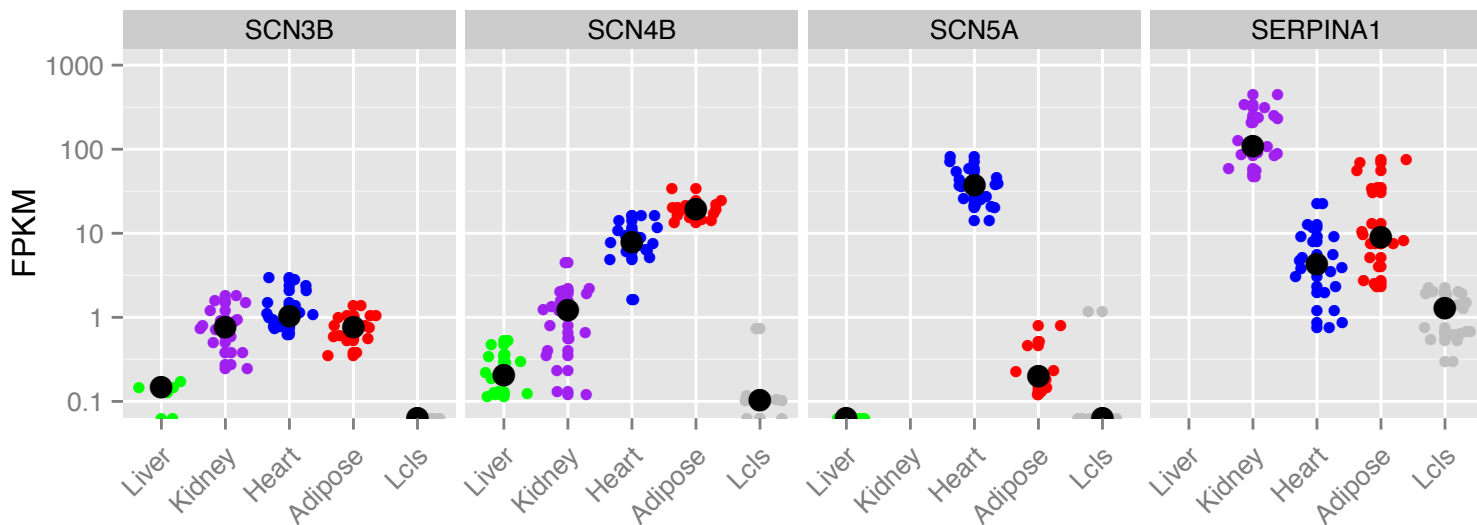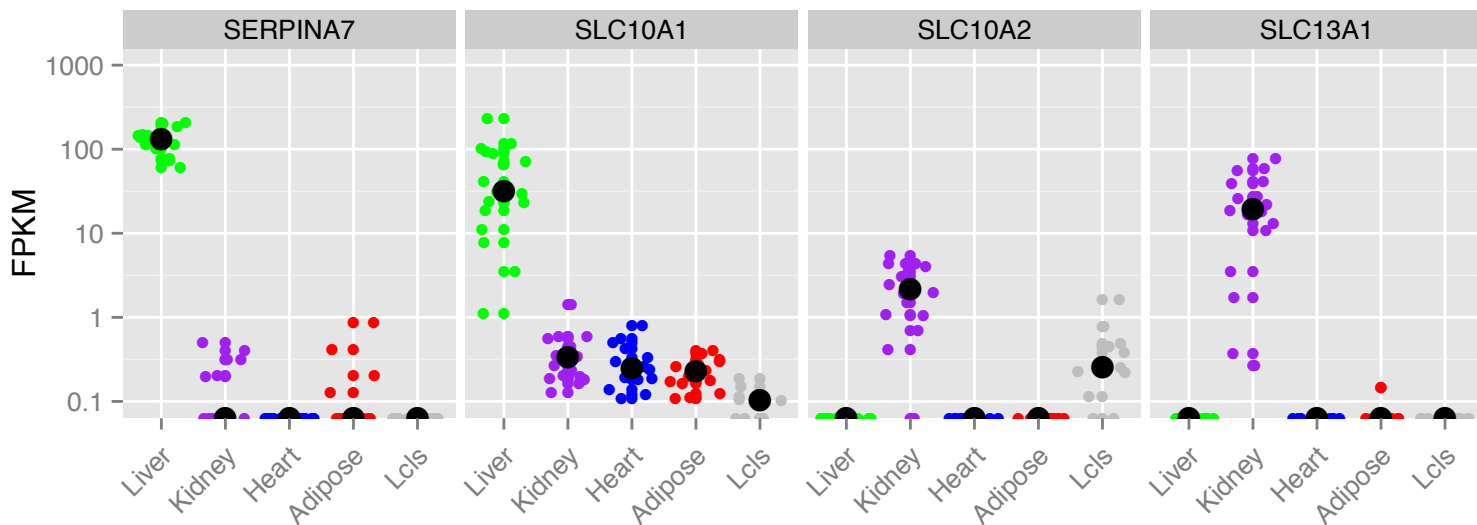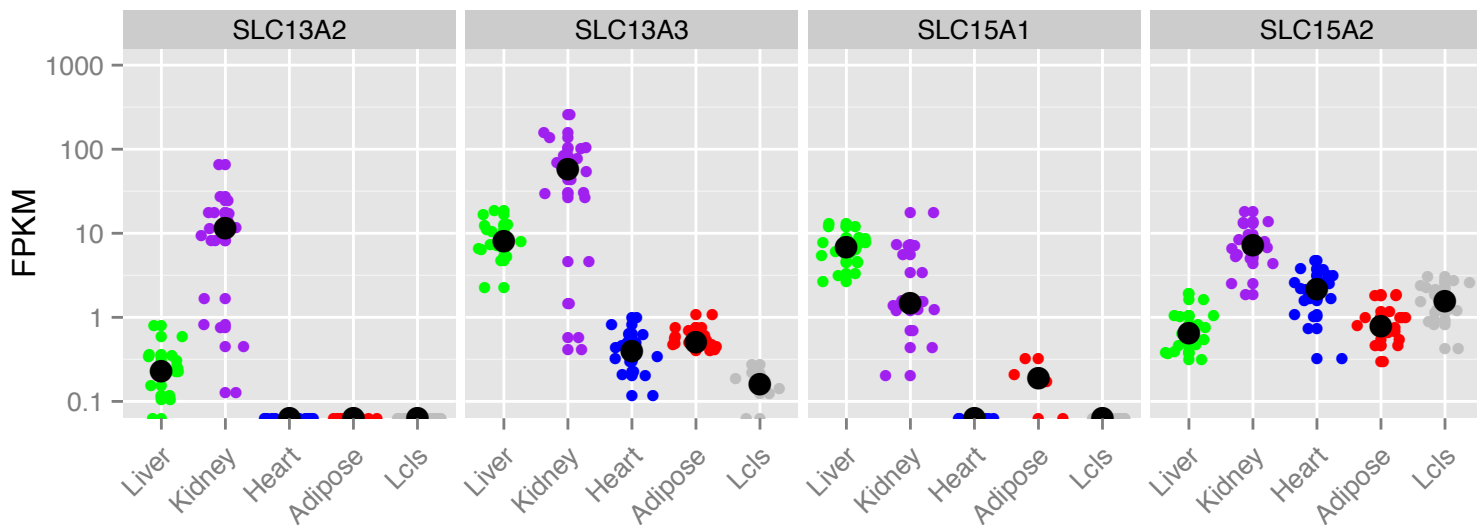

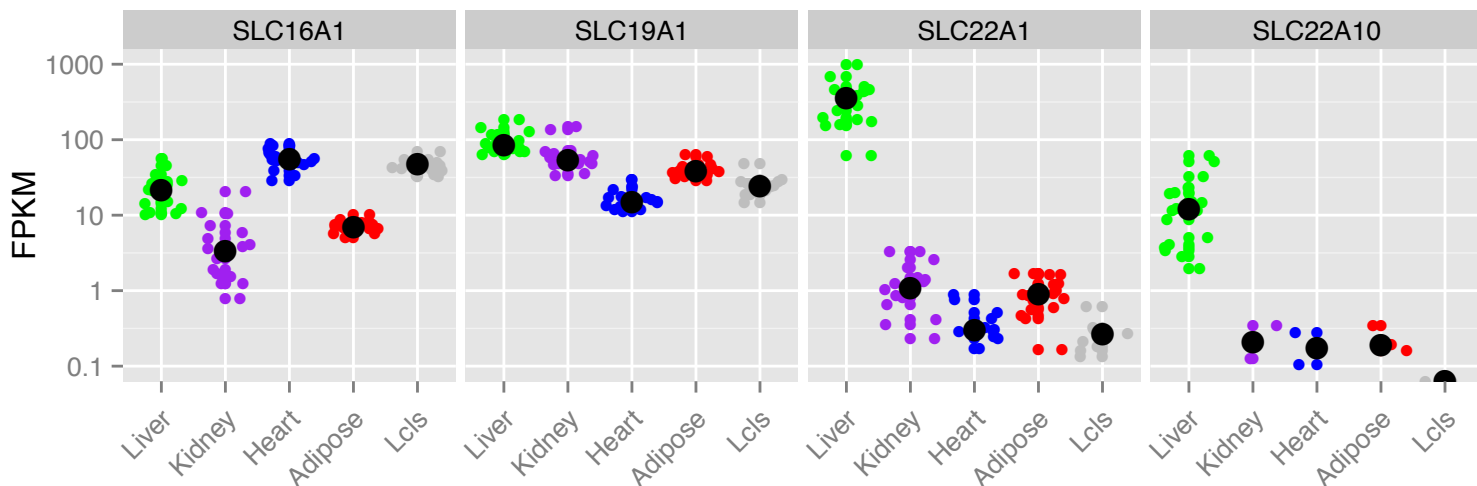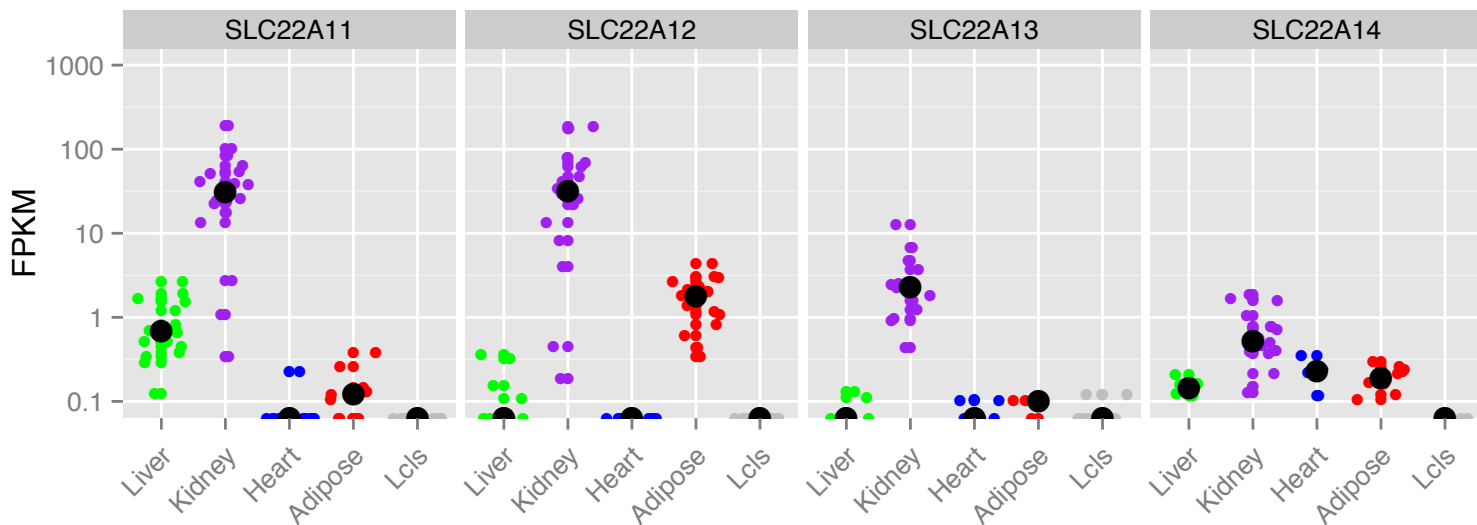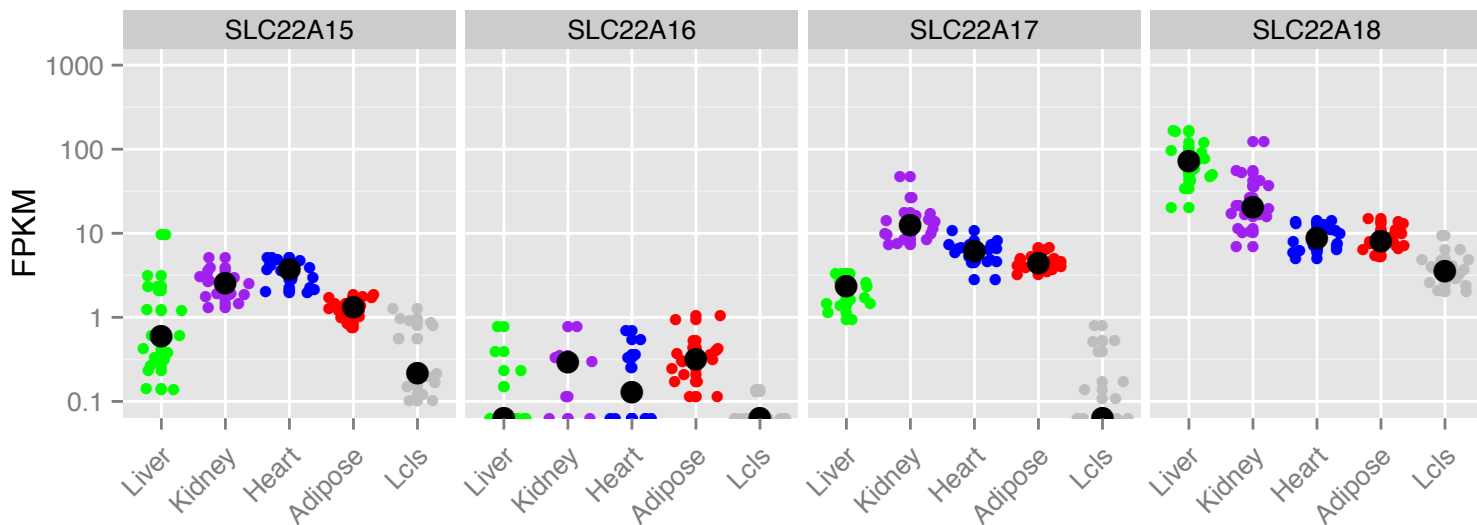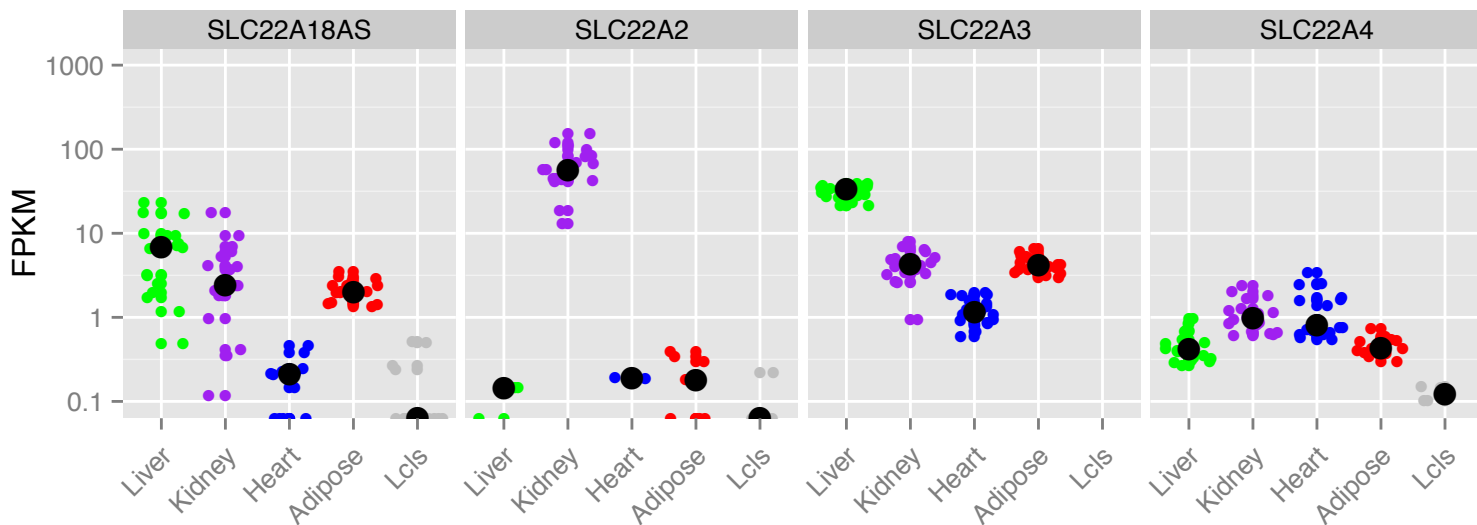

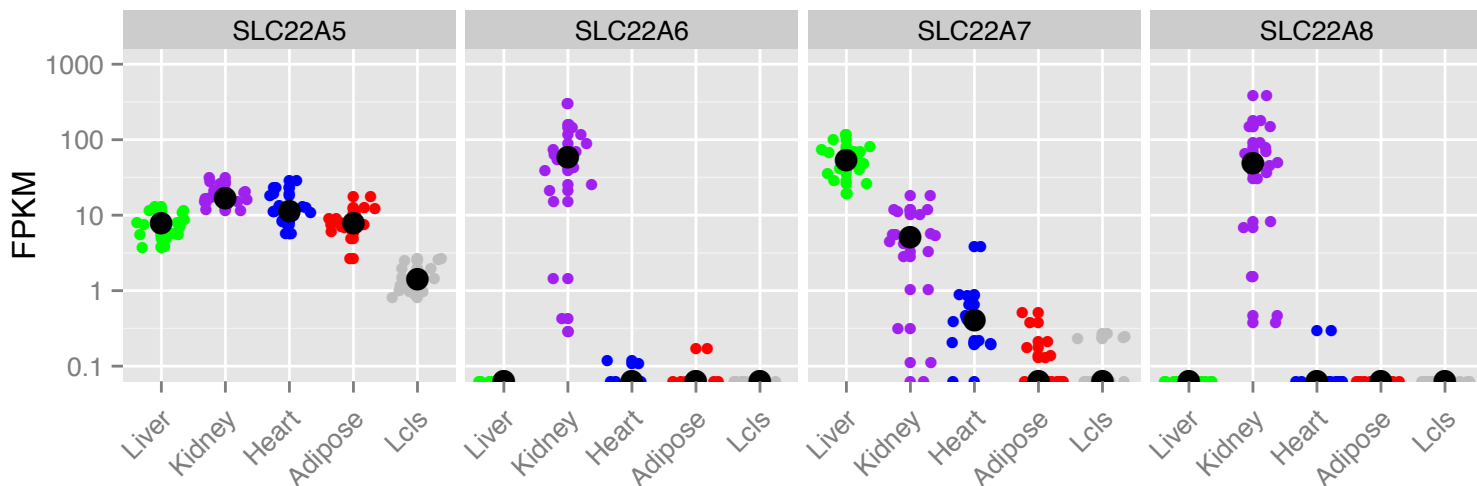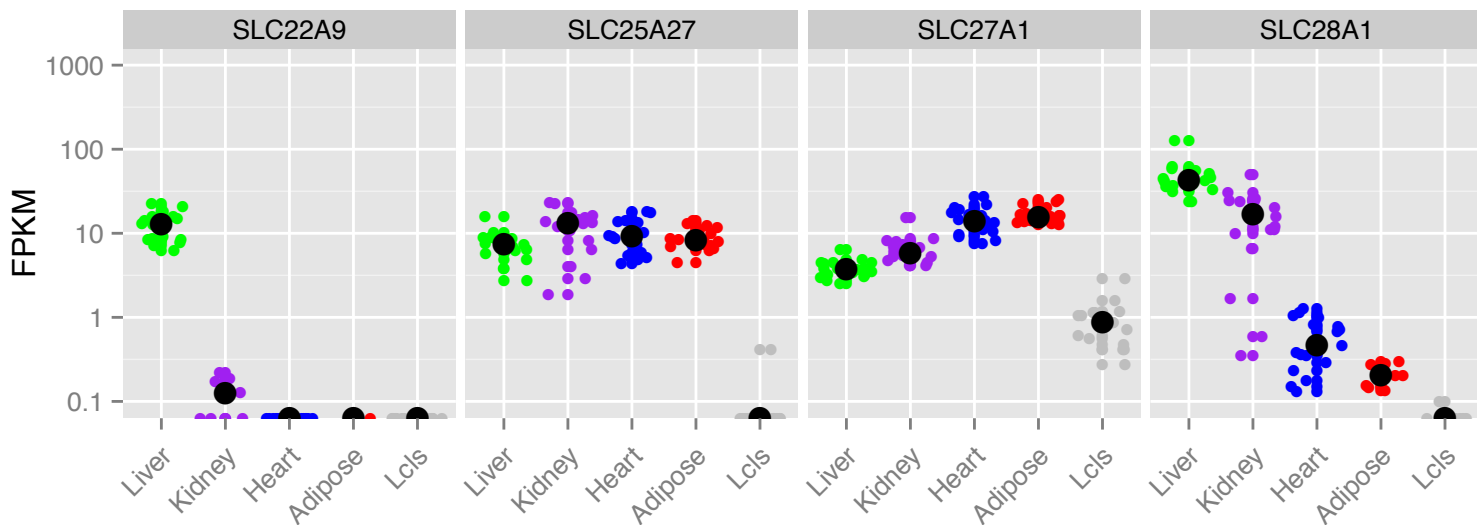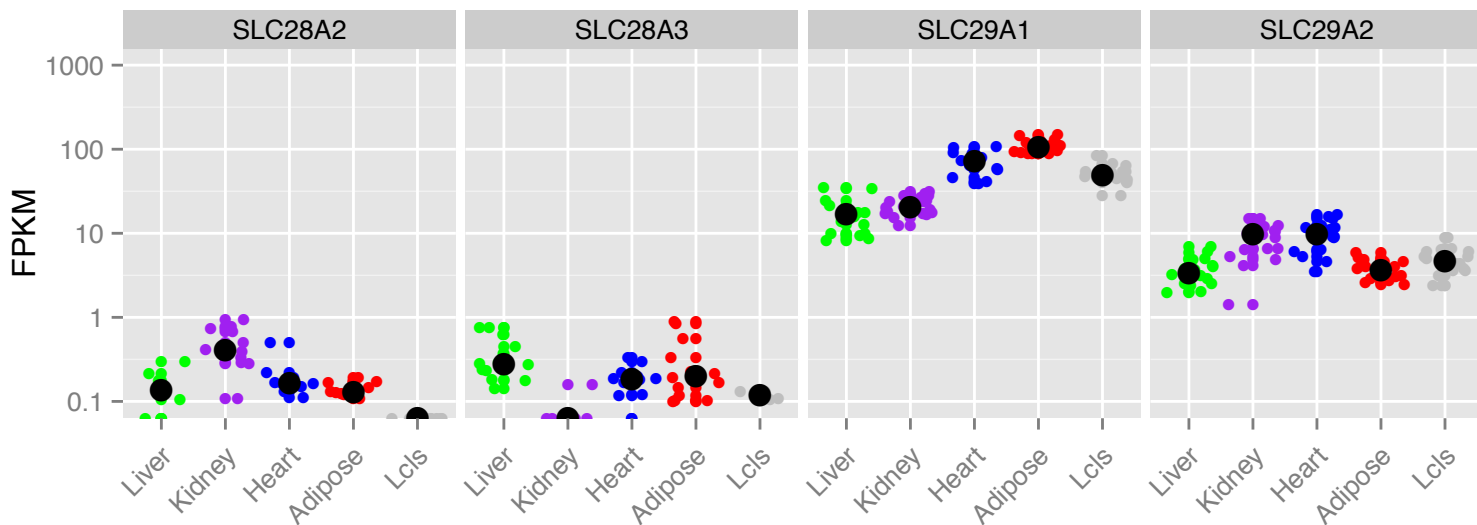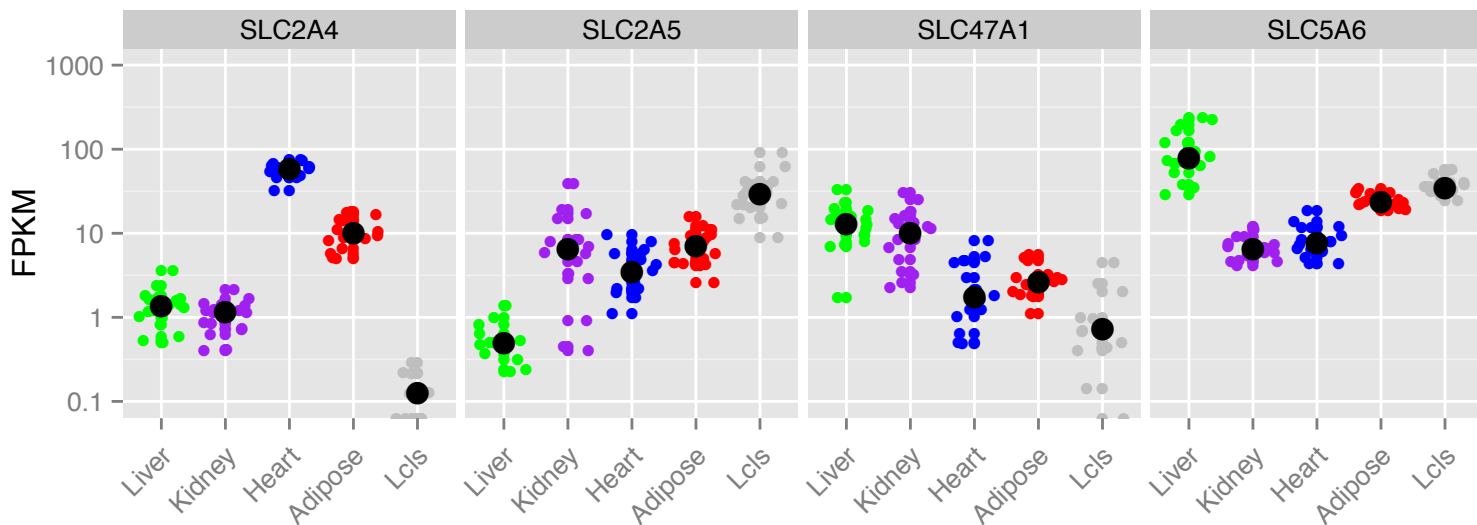

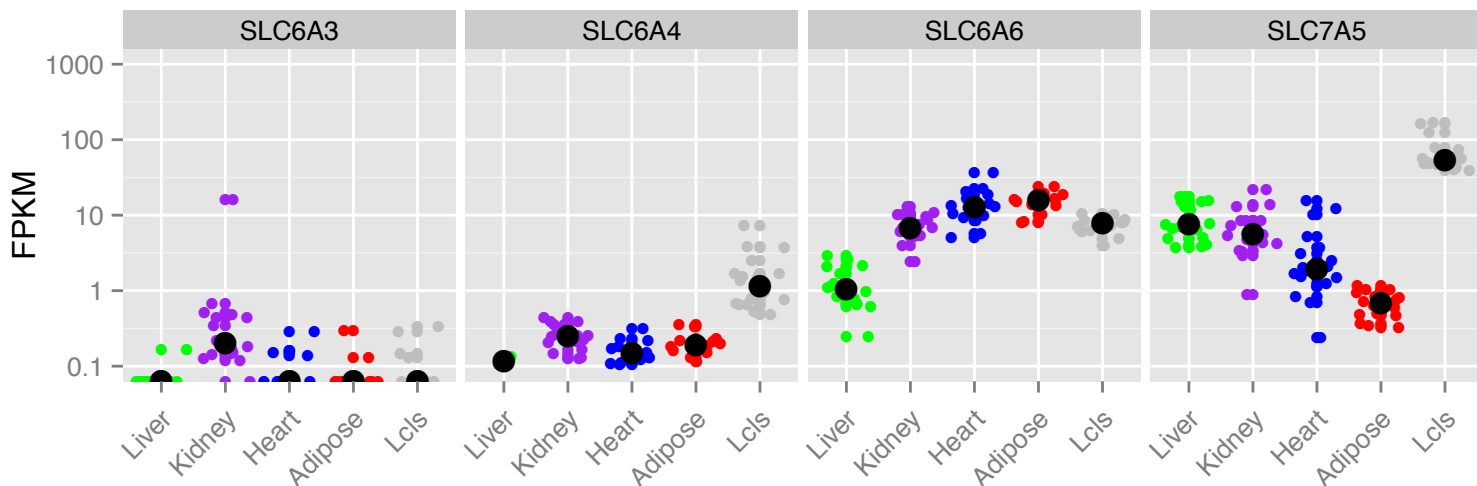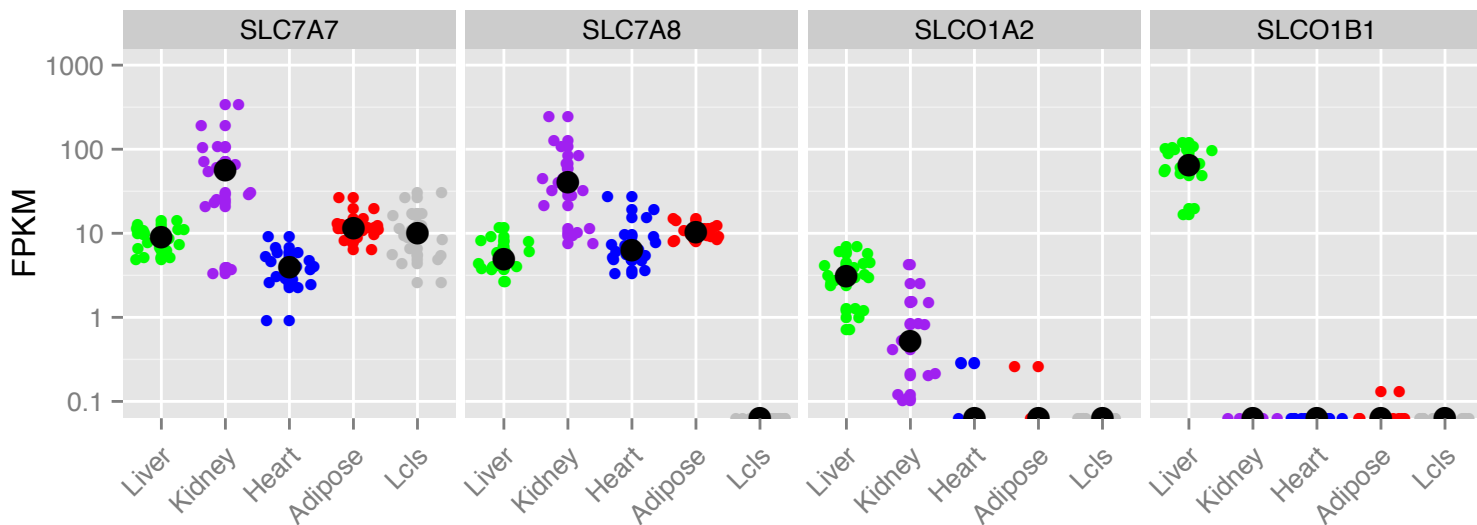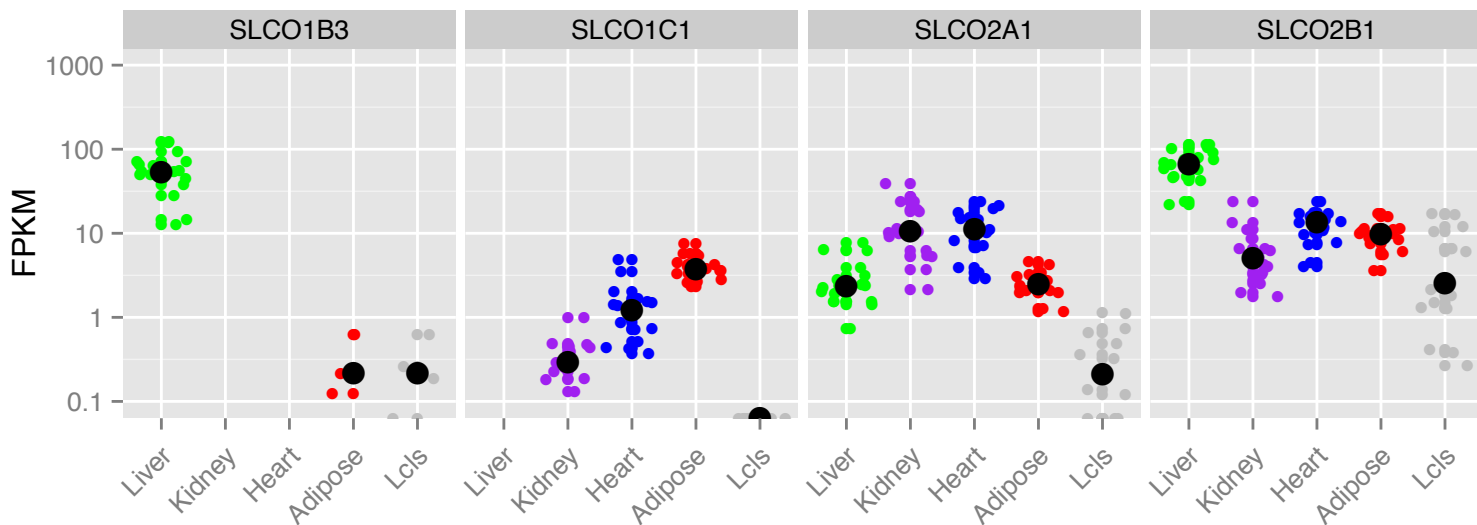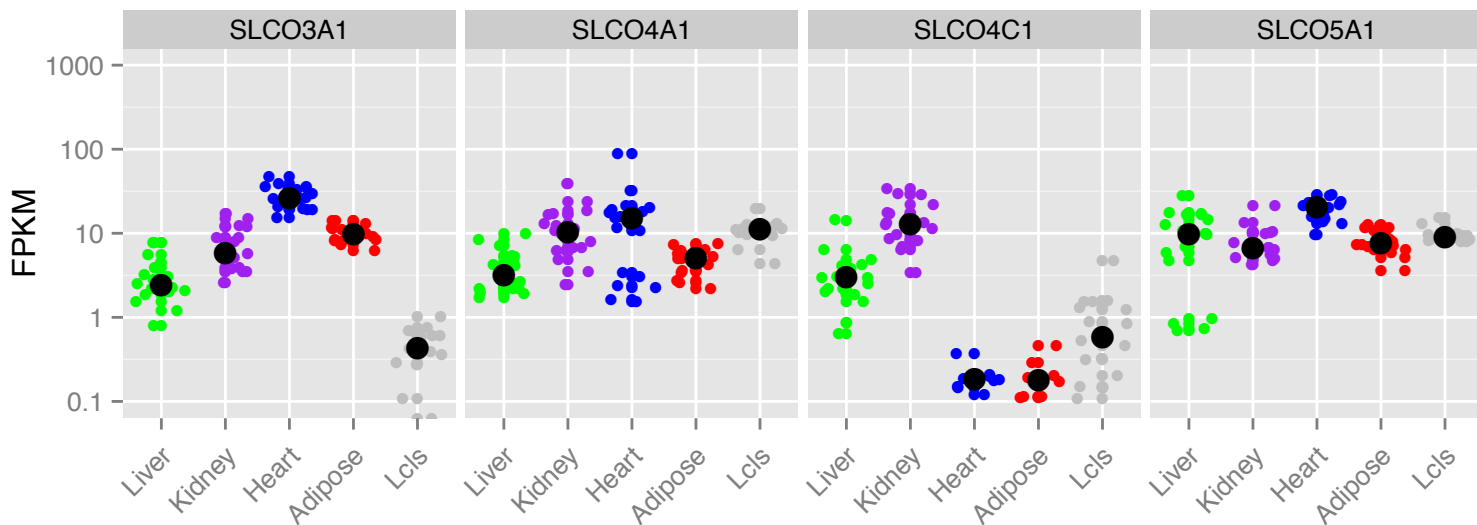

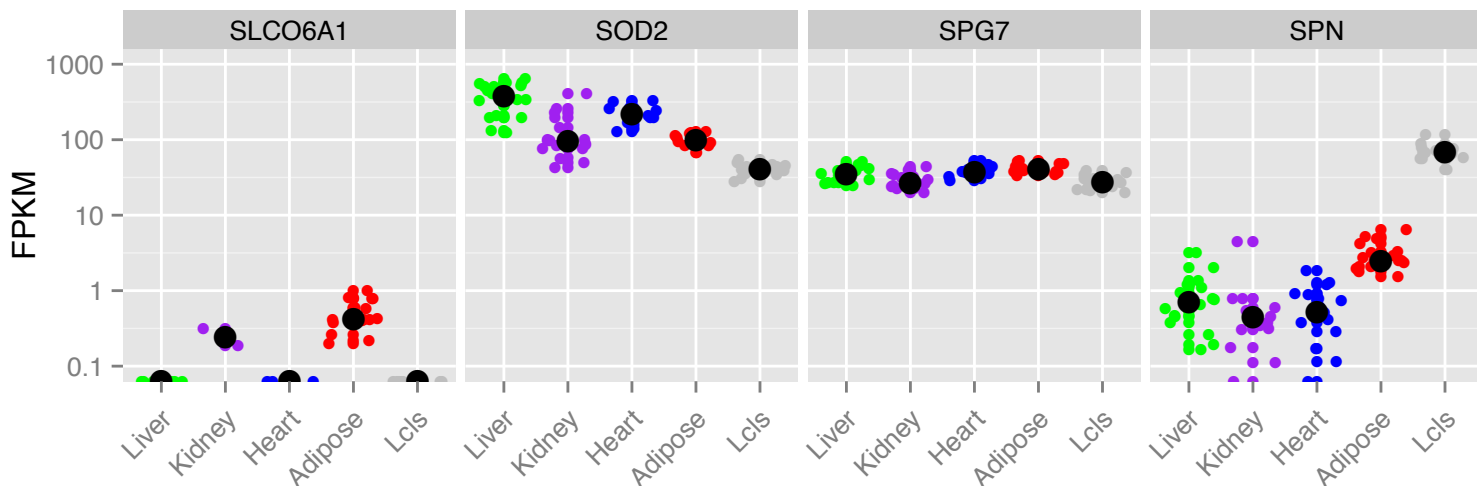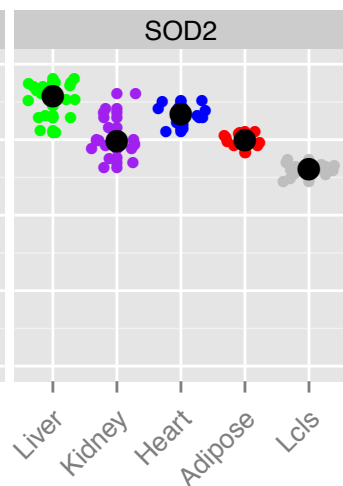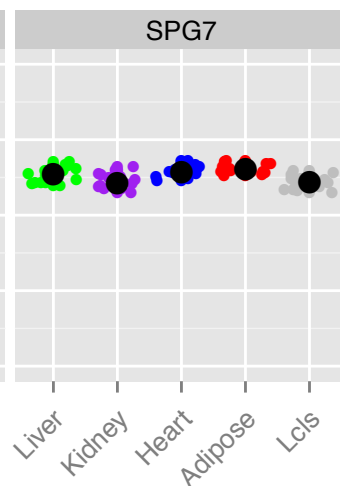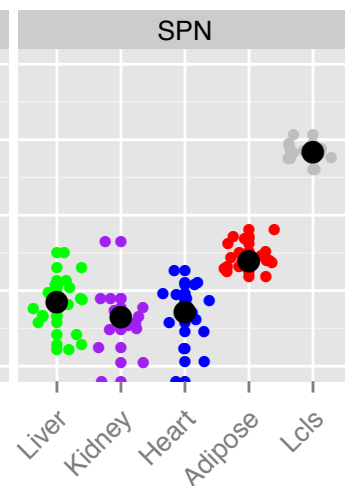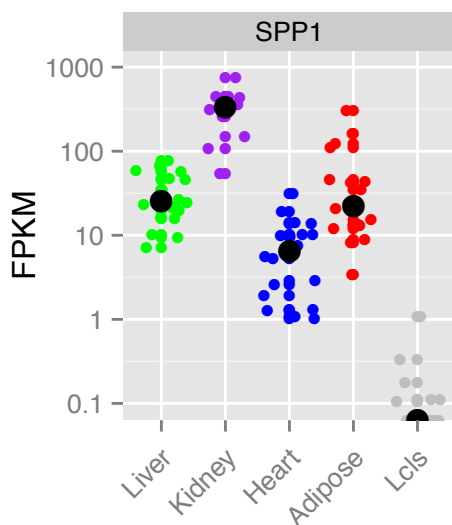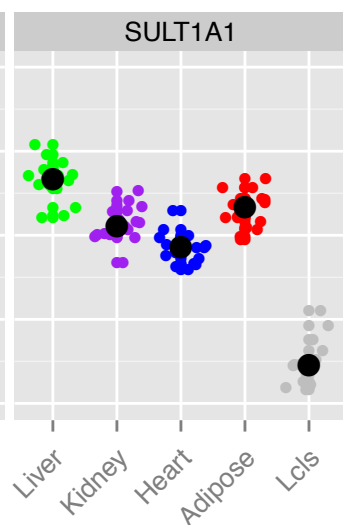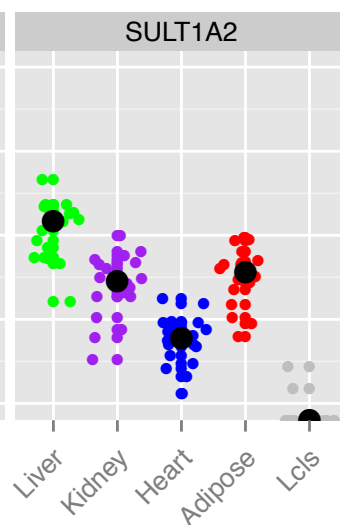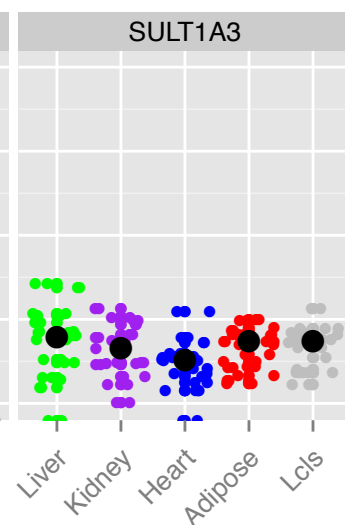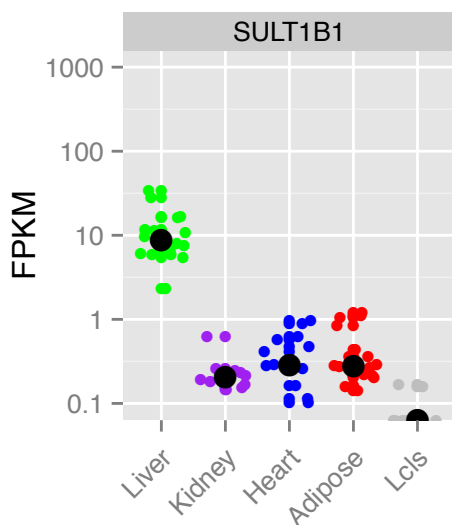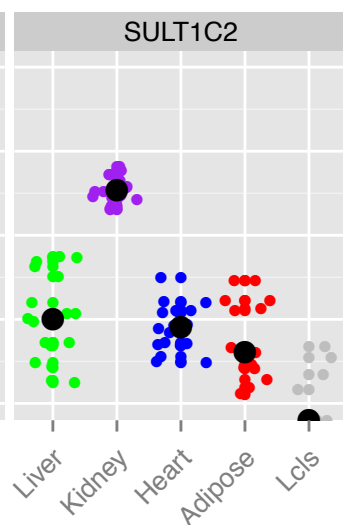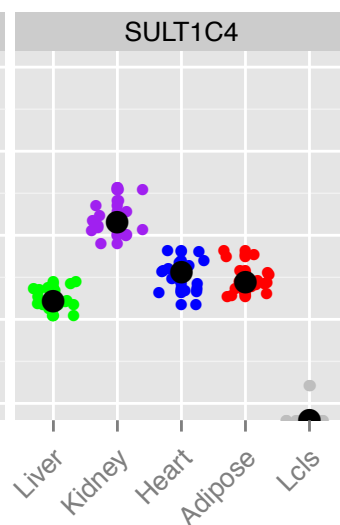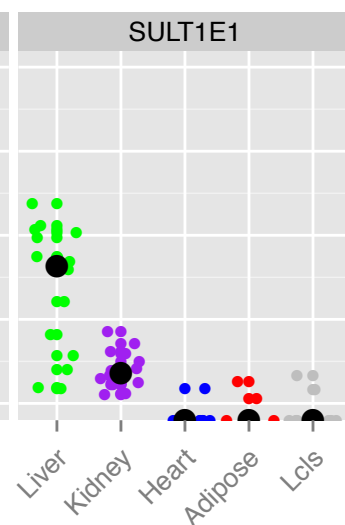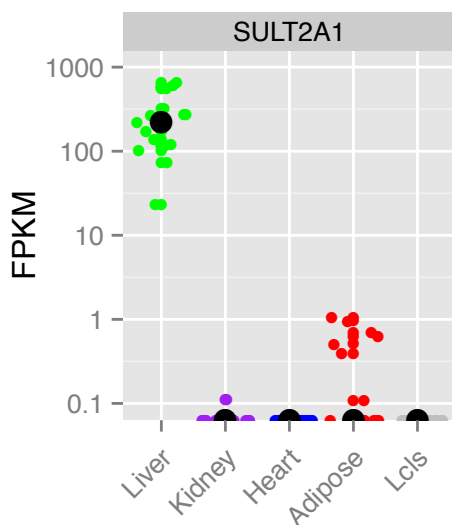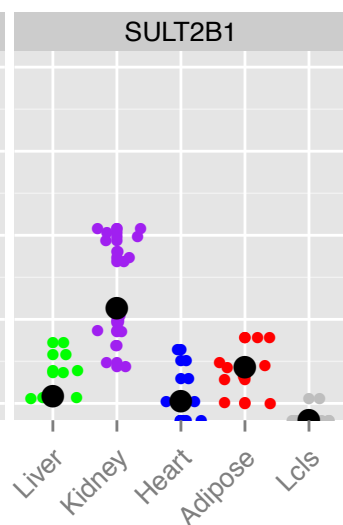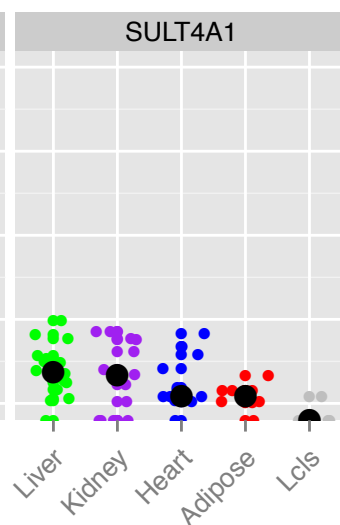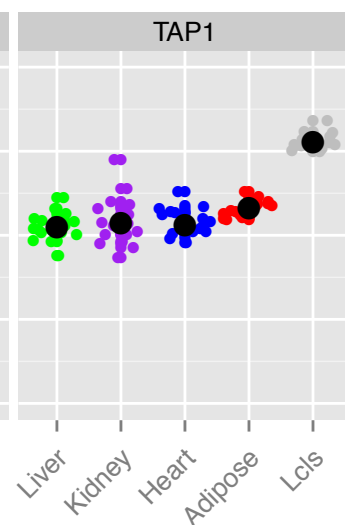





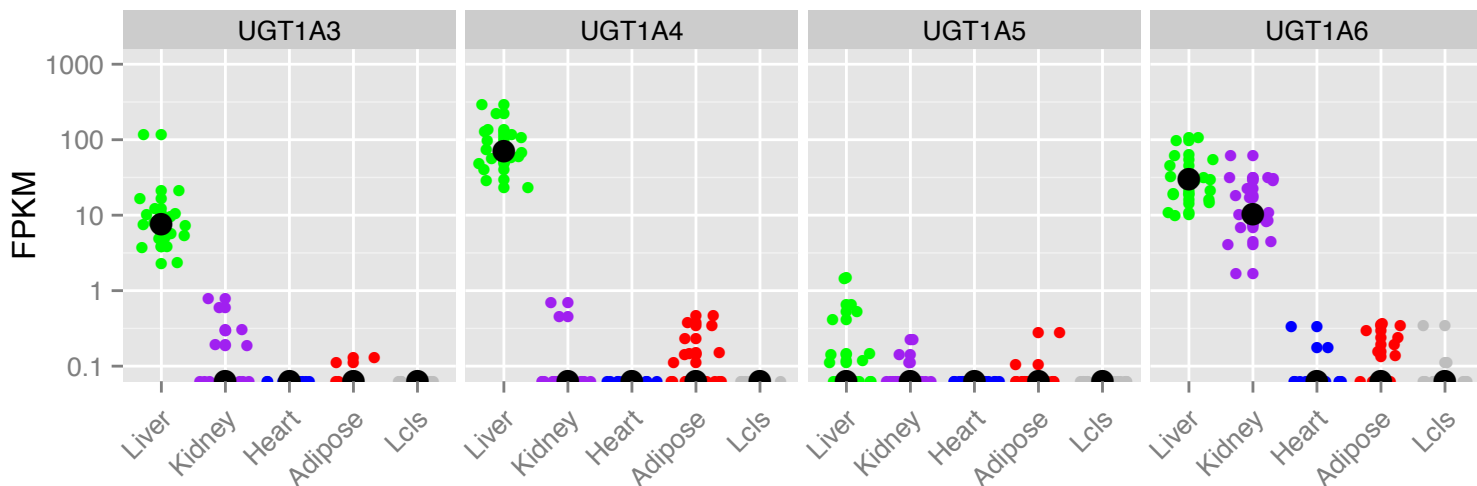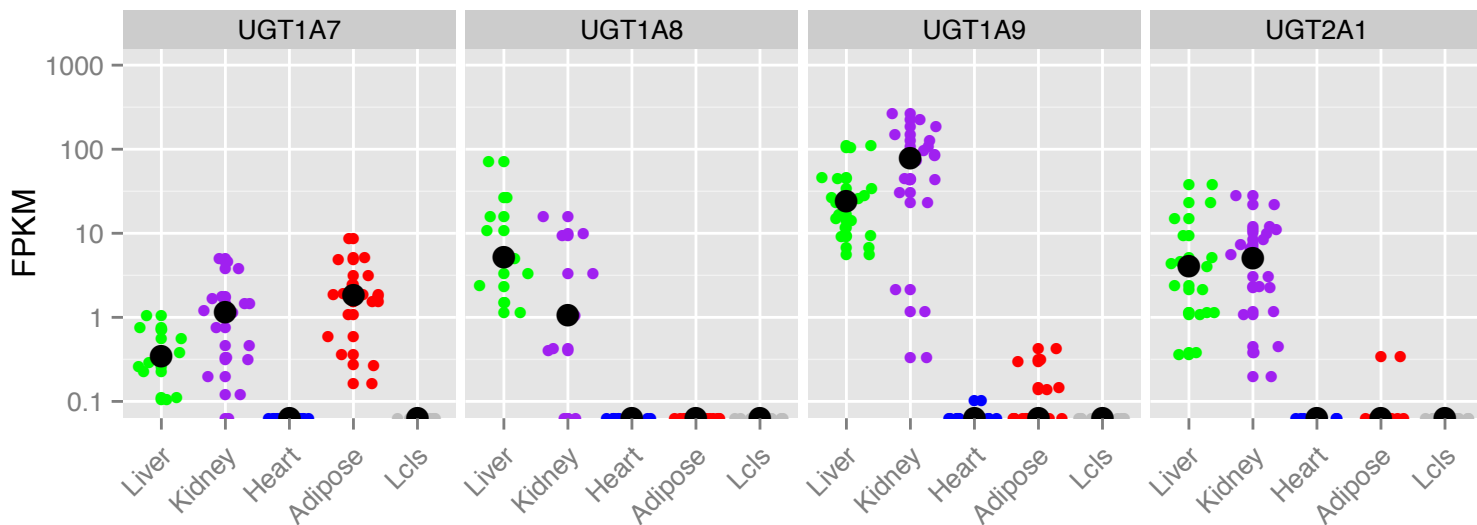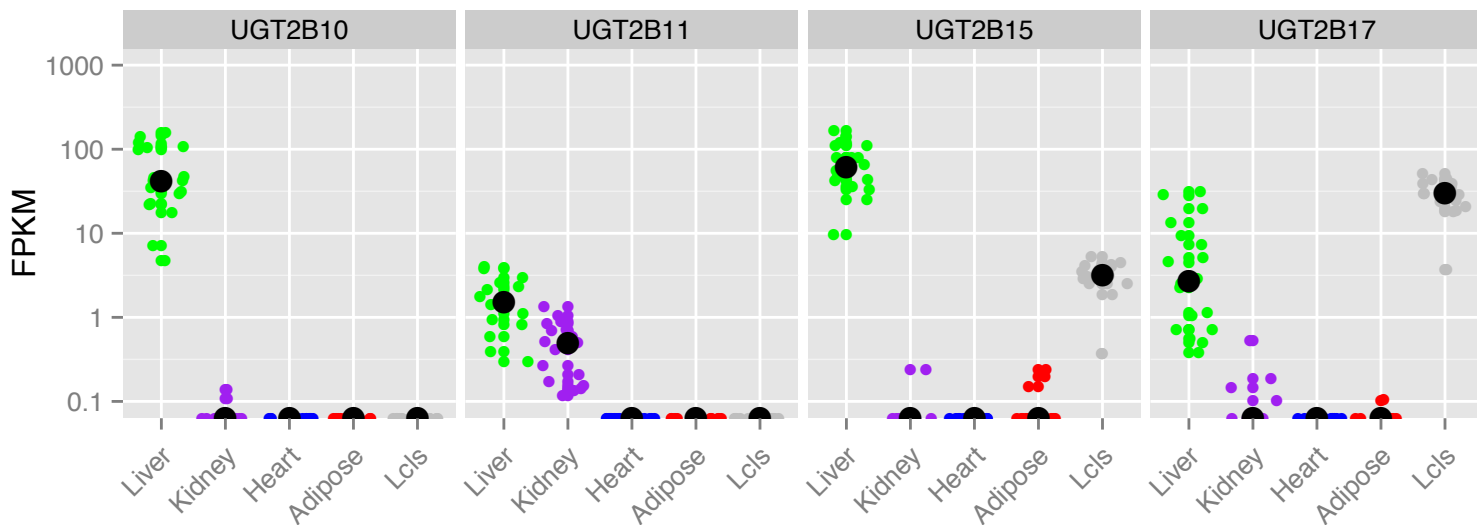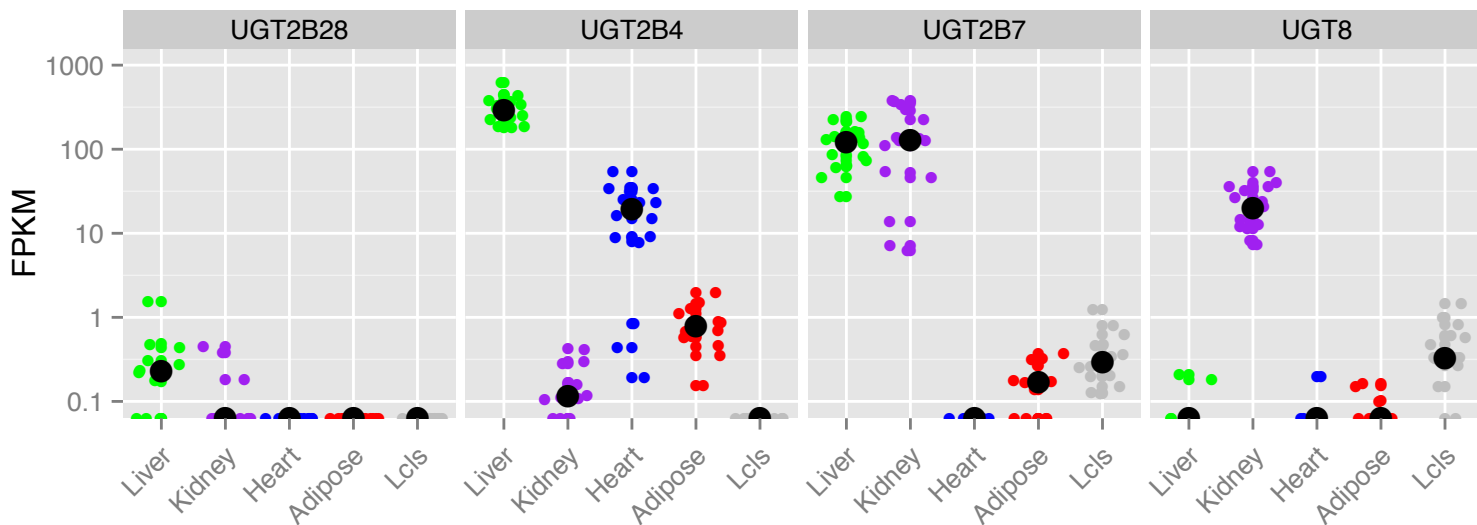

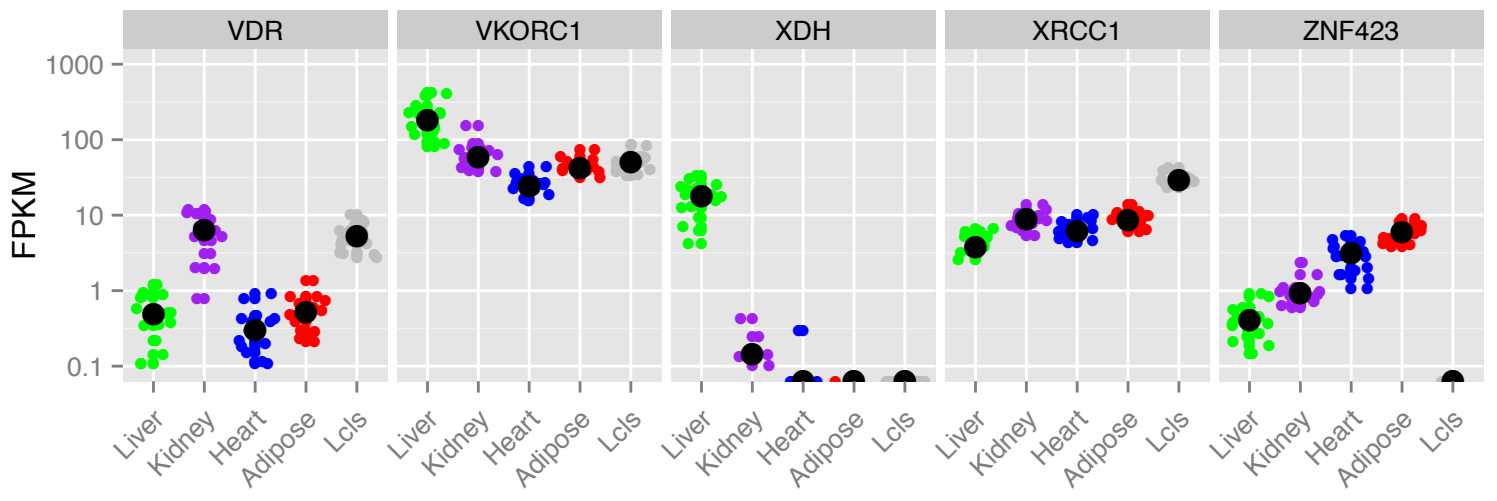

(A) Distribution of Protein Coding Gene FPKMs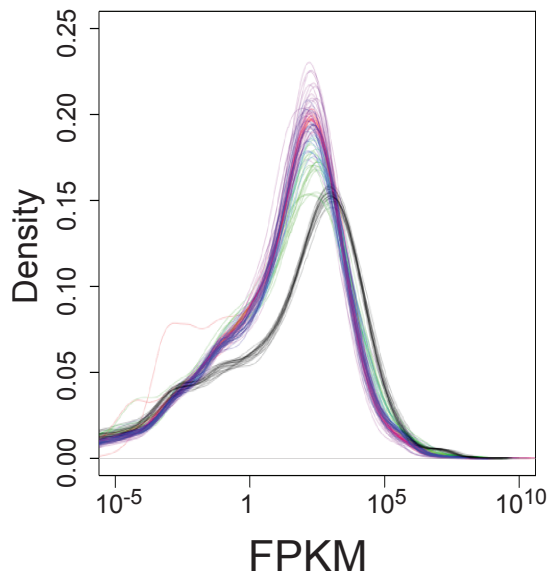(B) Distribution of Pharmacogene FPKMs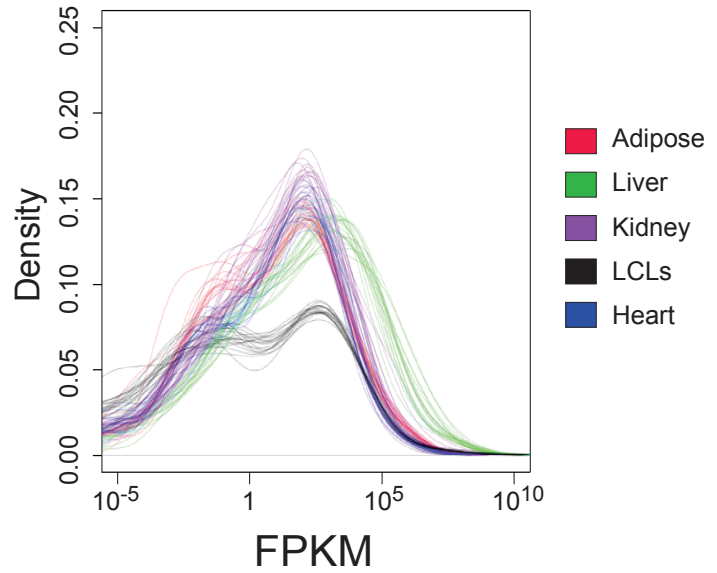(C) Distribution of Protein Coding Gene FPKMs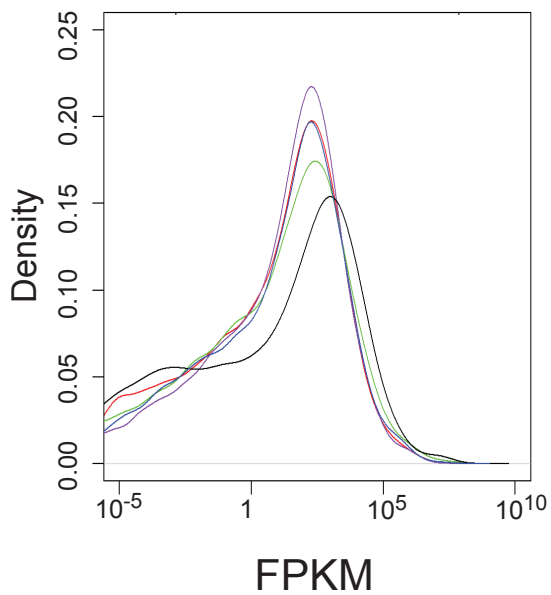(D) Distribution of Pharmacogene FPKMs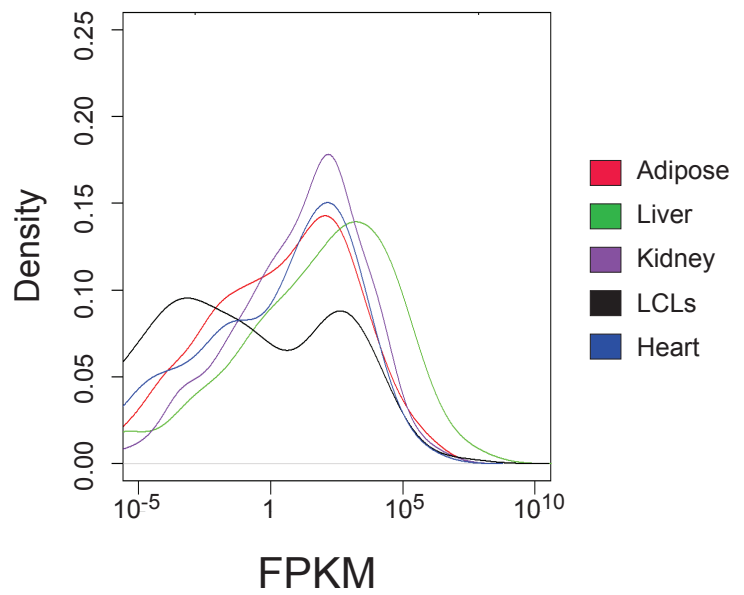

S5A

# All Protein Coding Genes

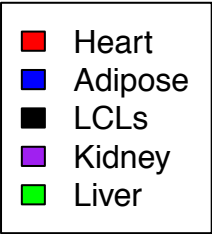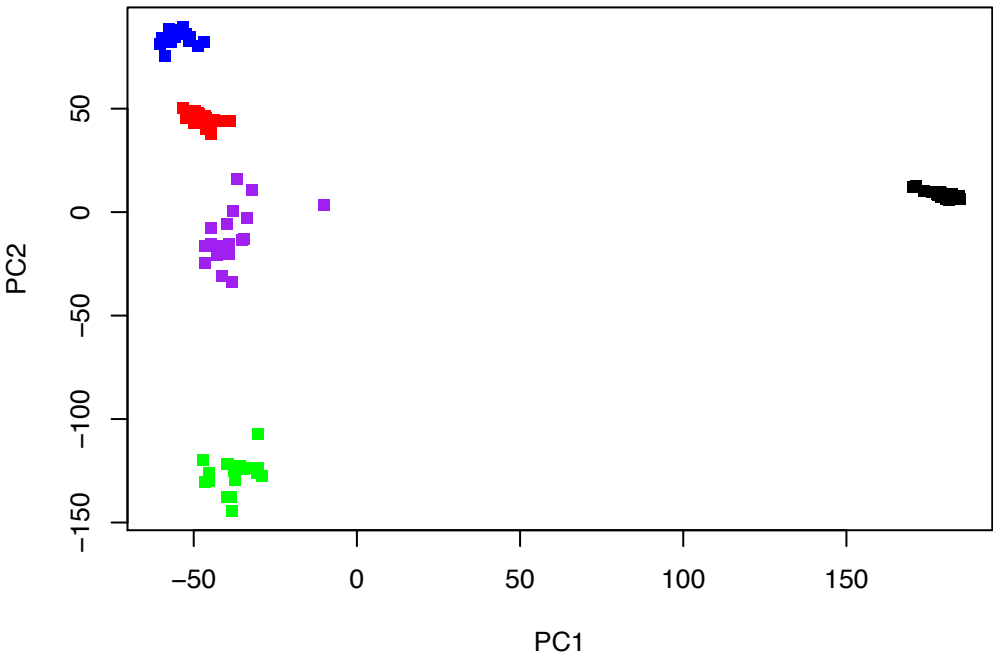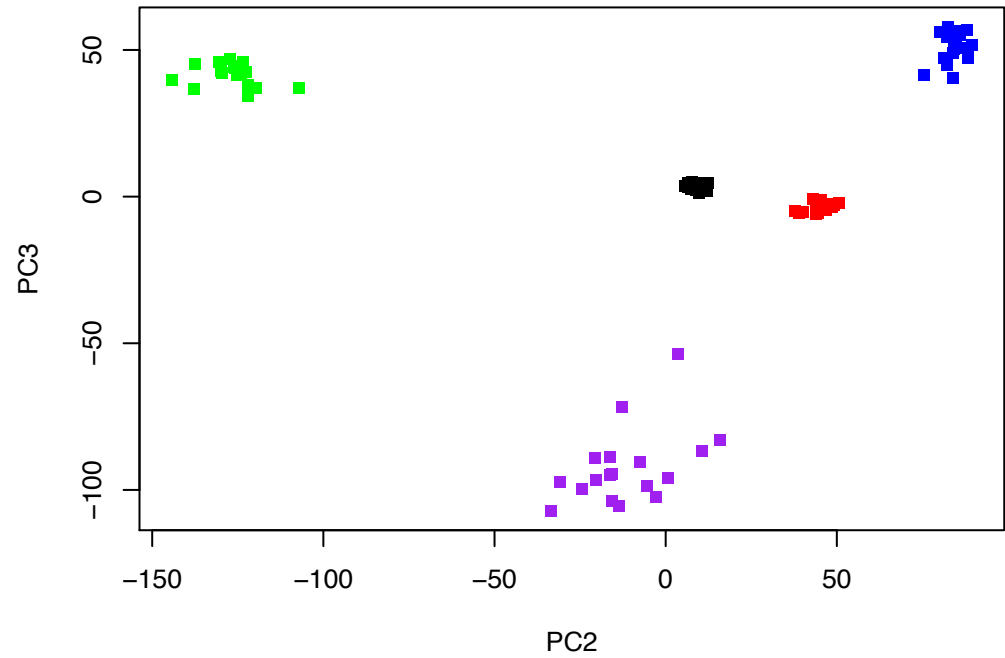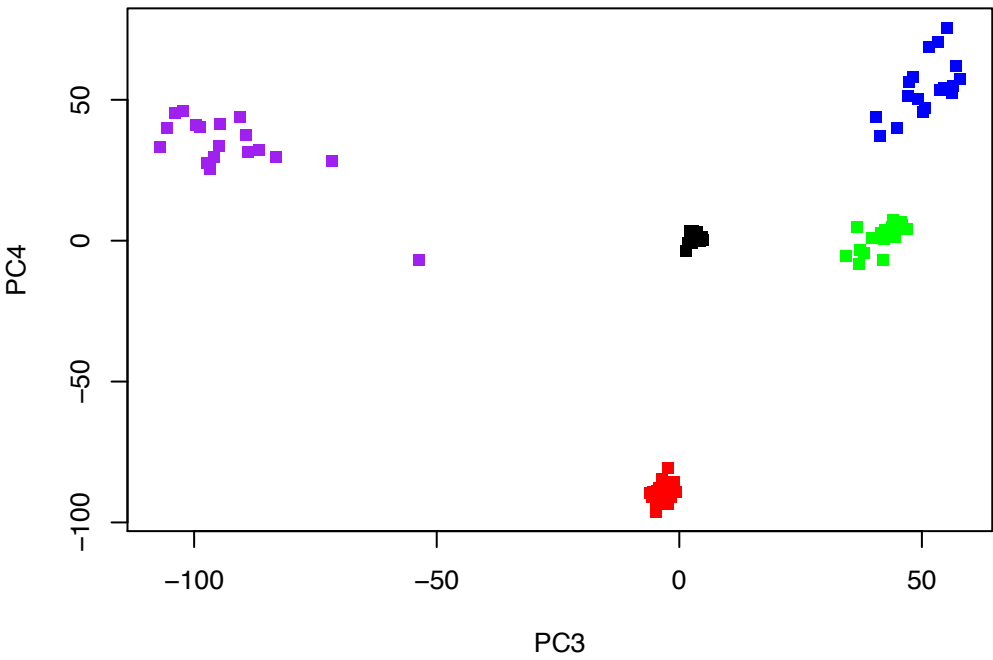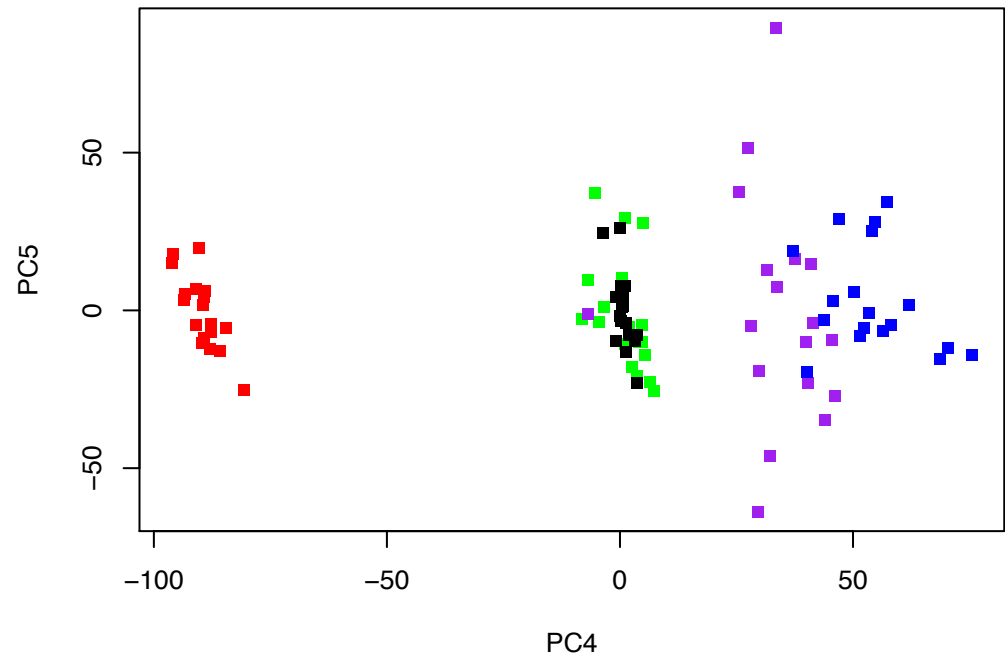

S5B

# Pharmacogenes

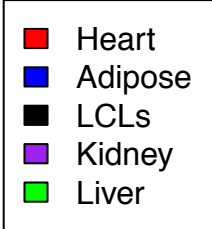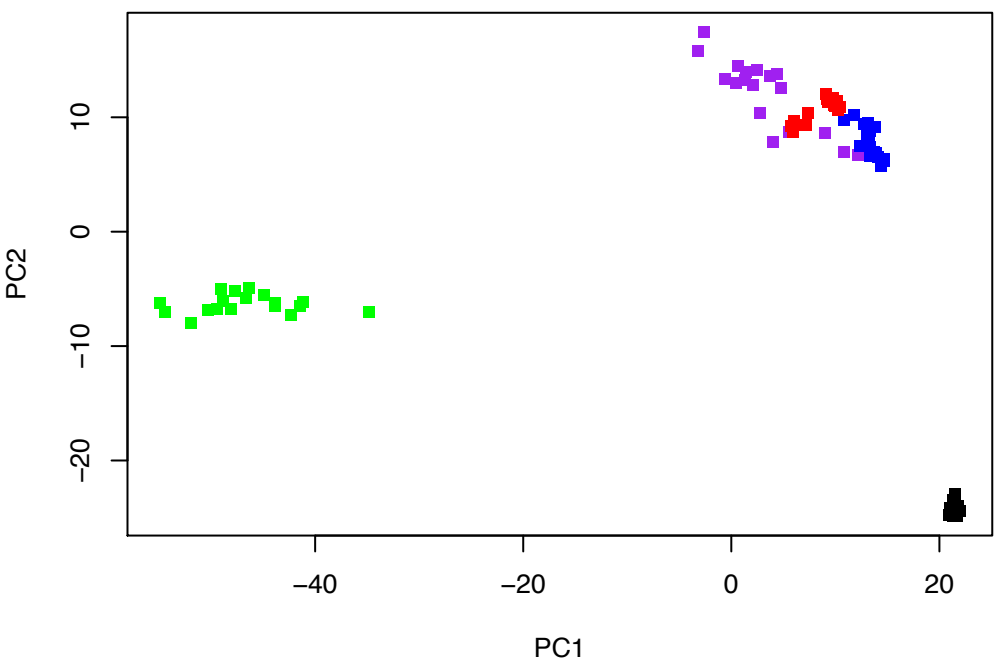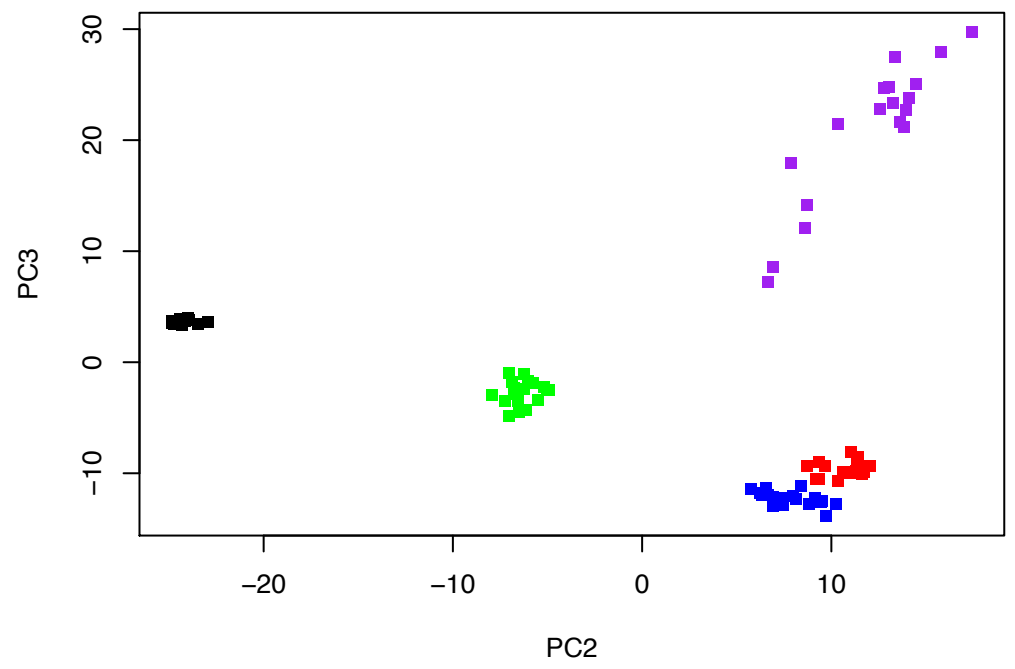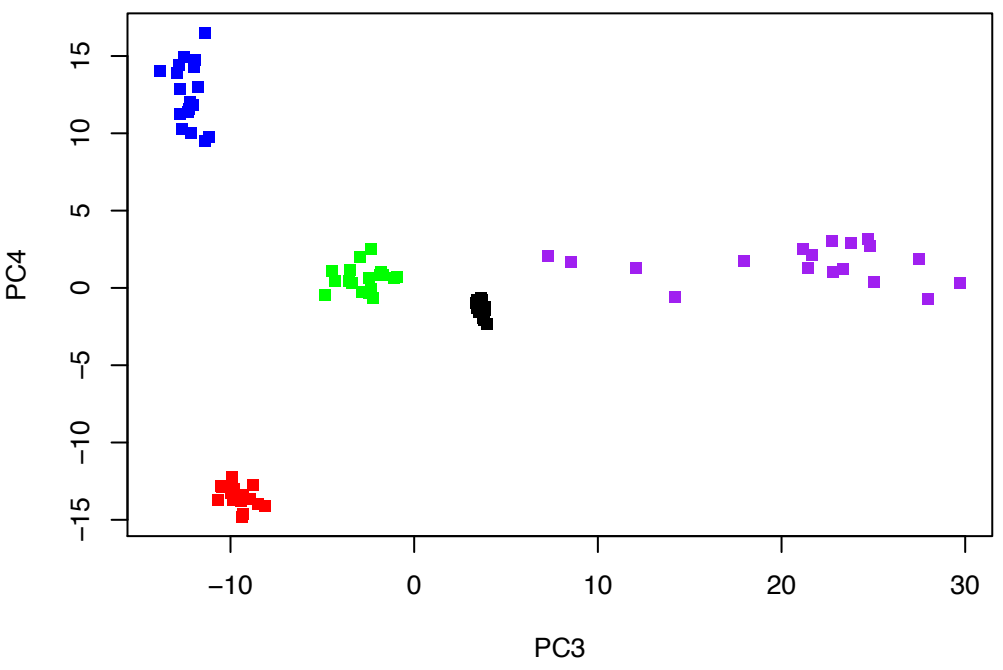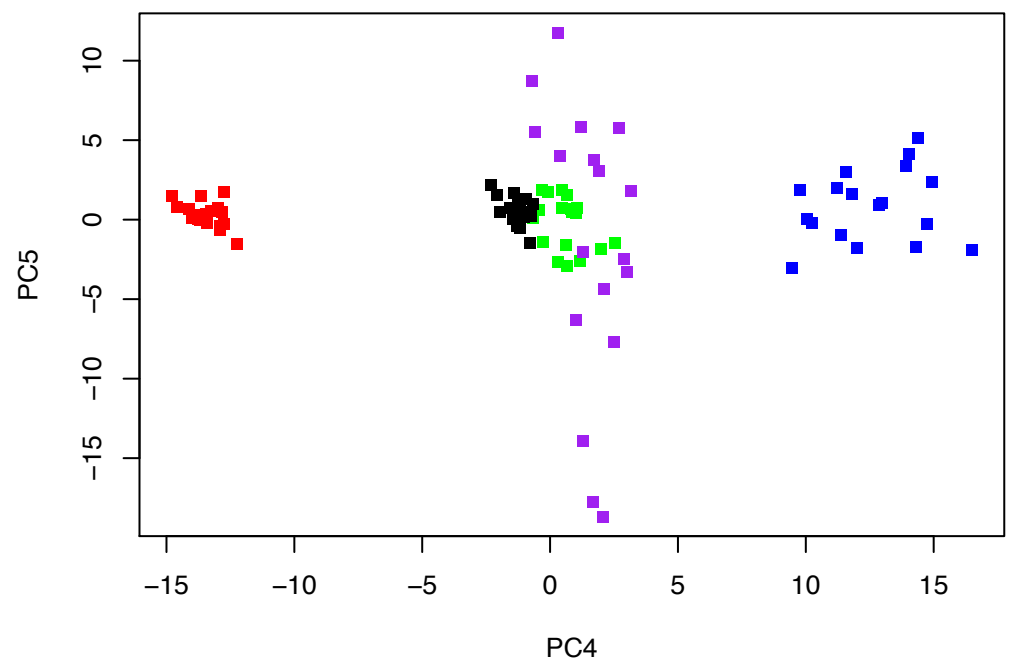

A

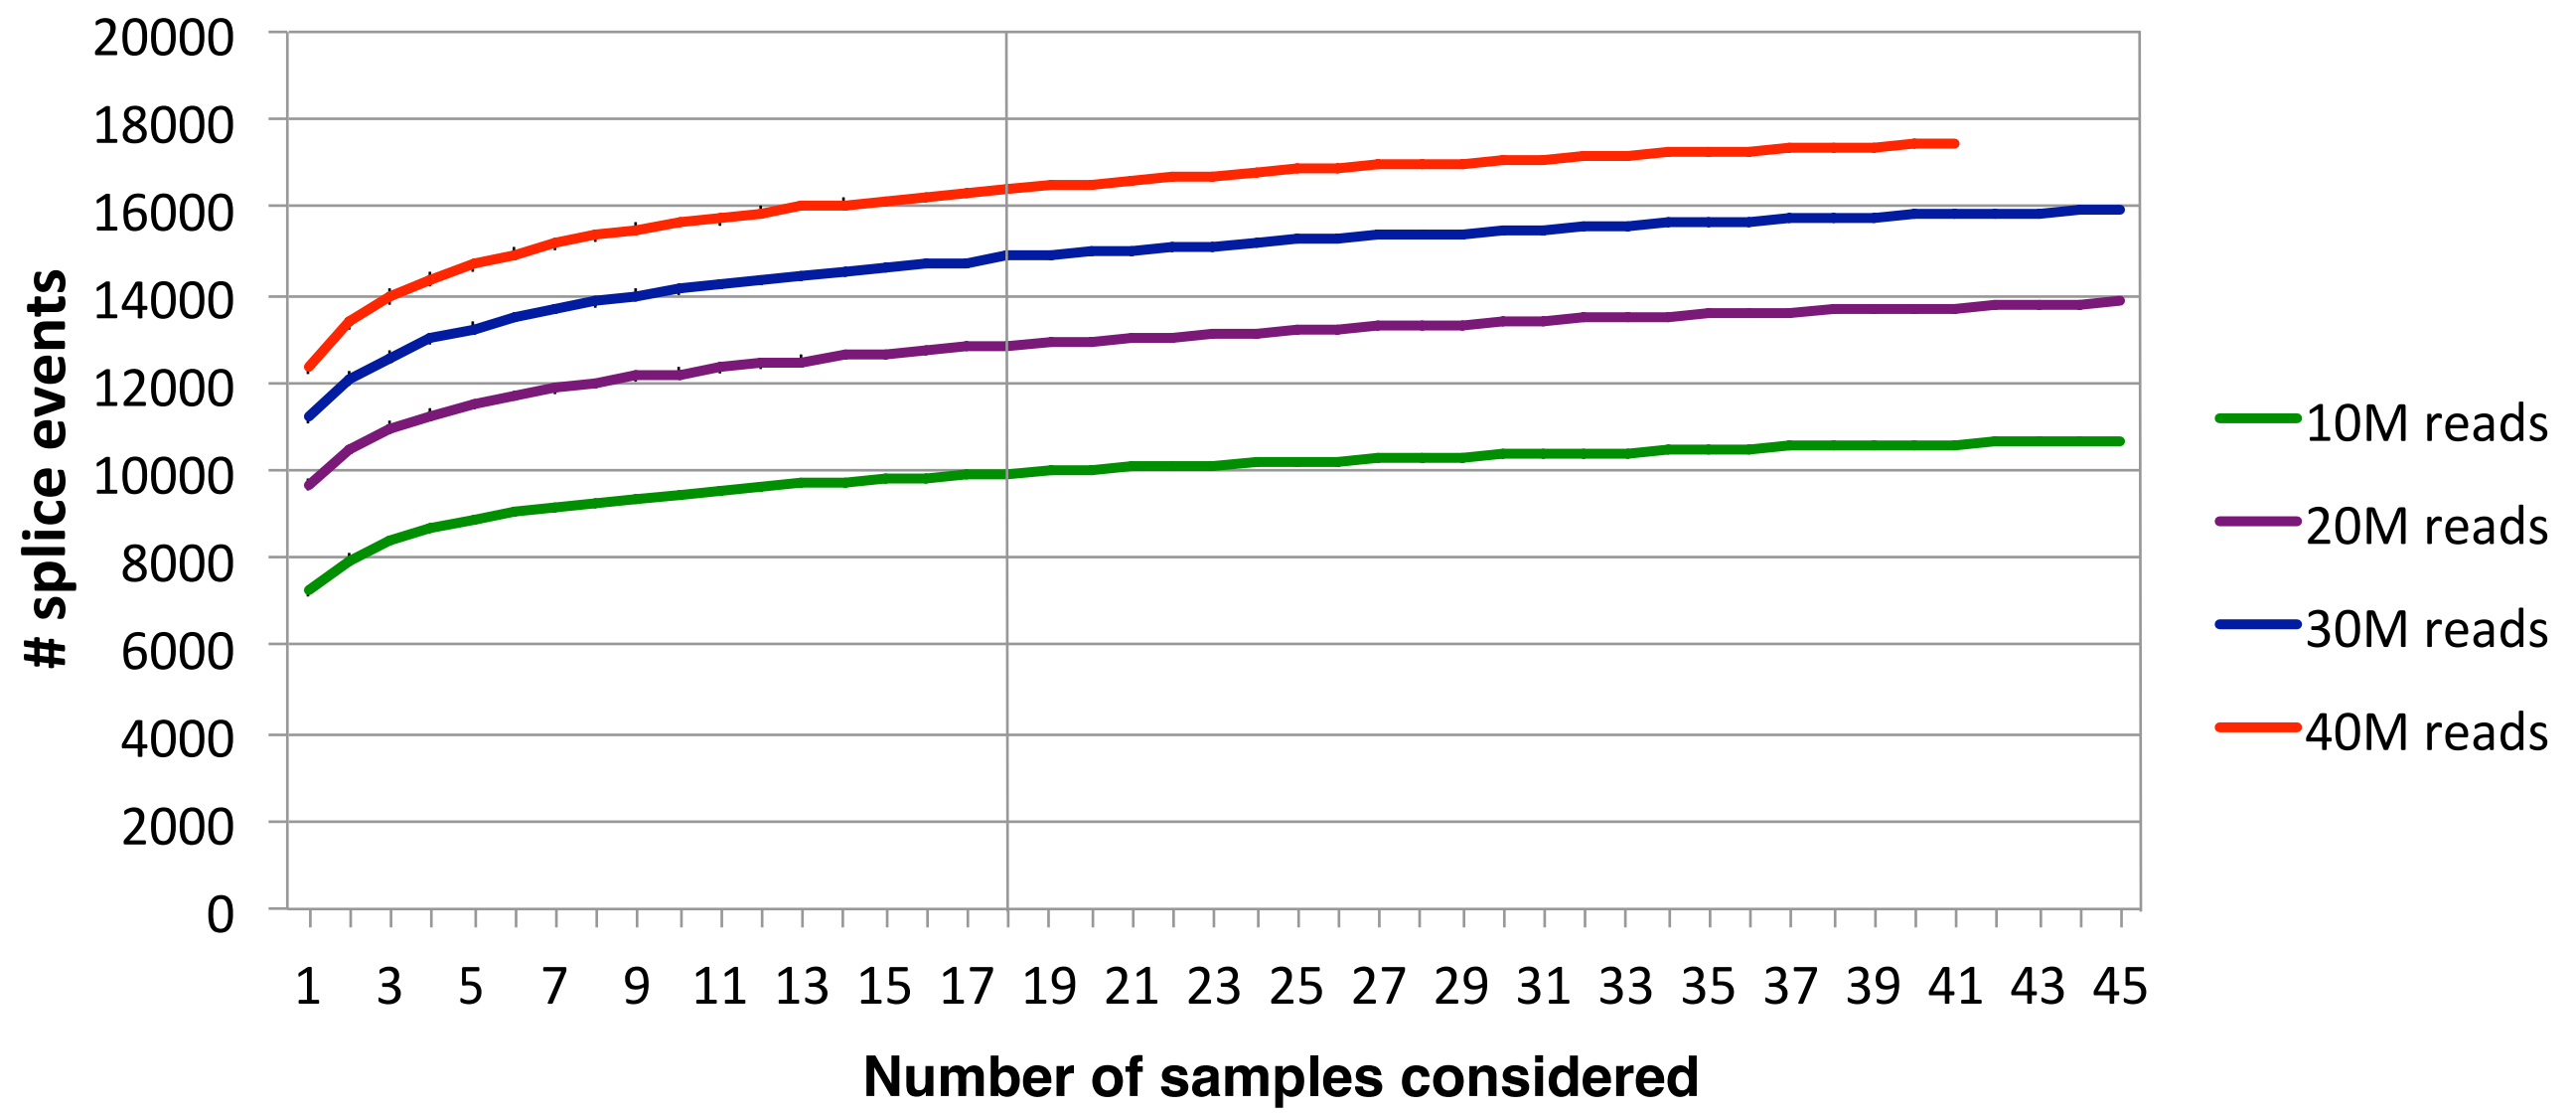

B

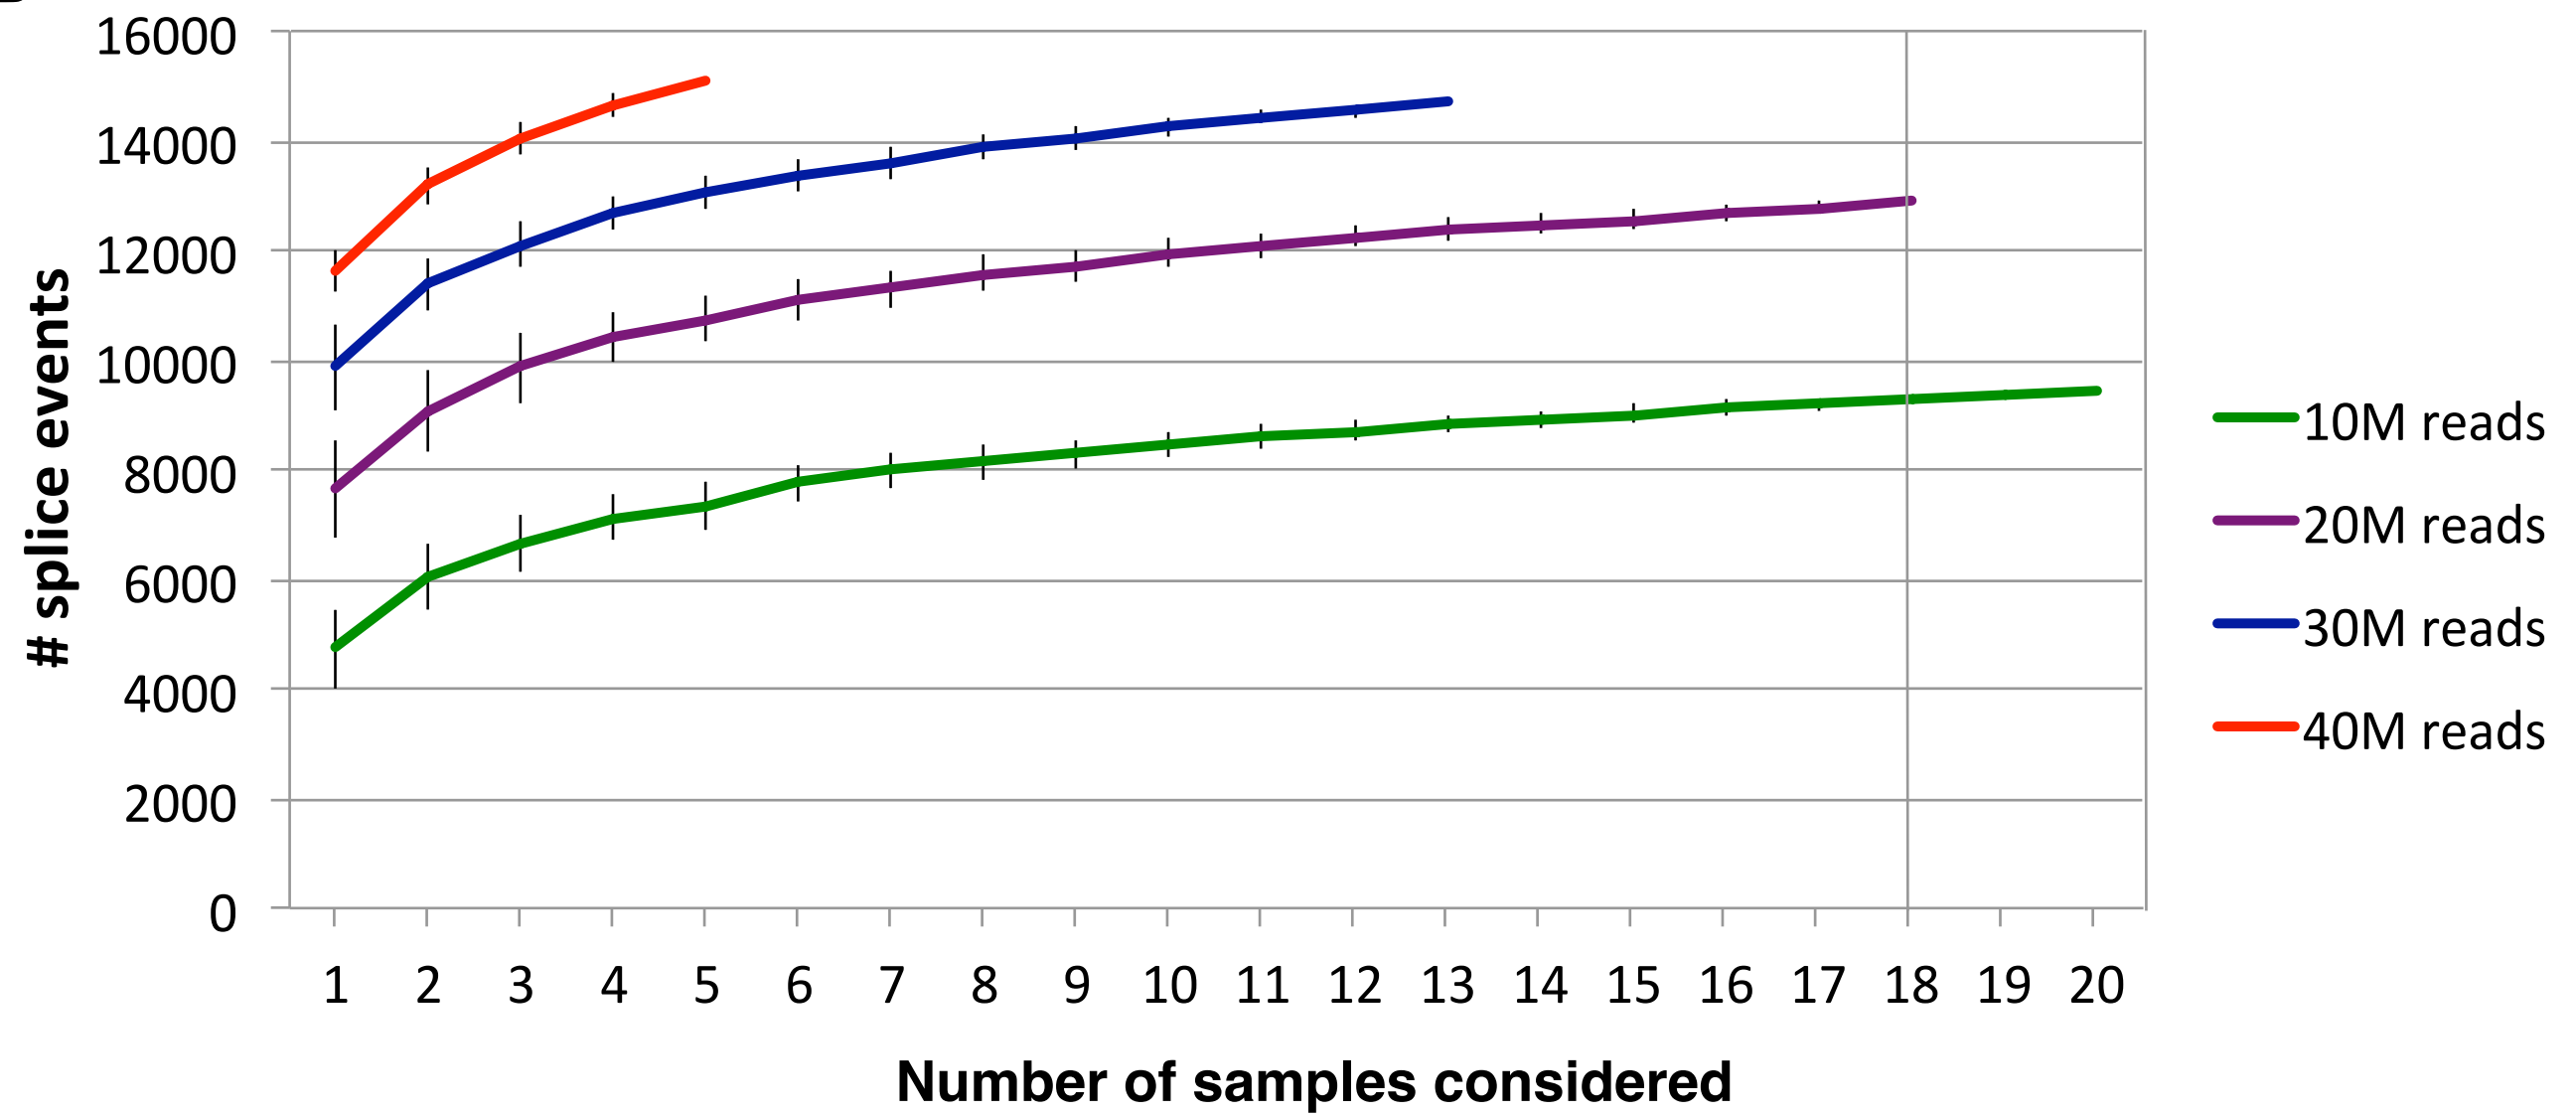

C

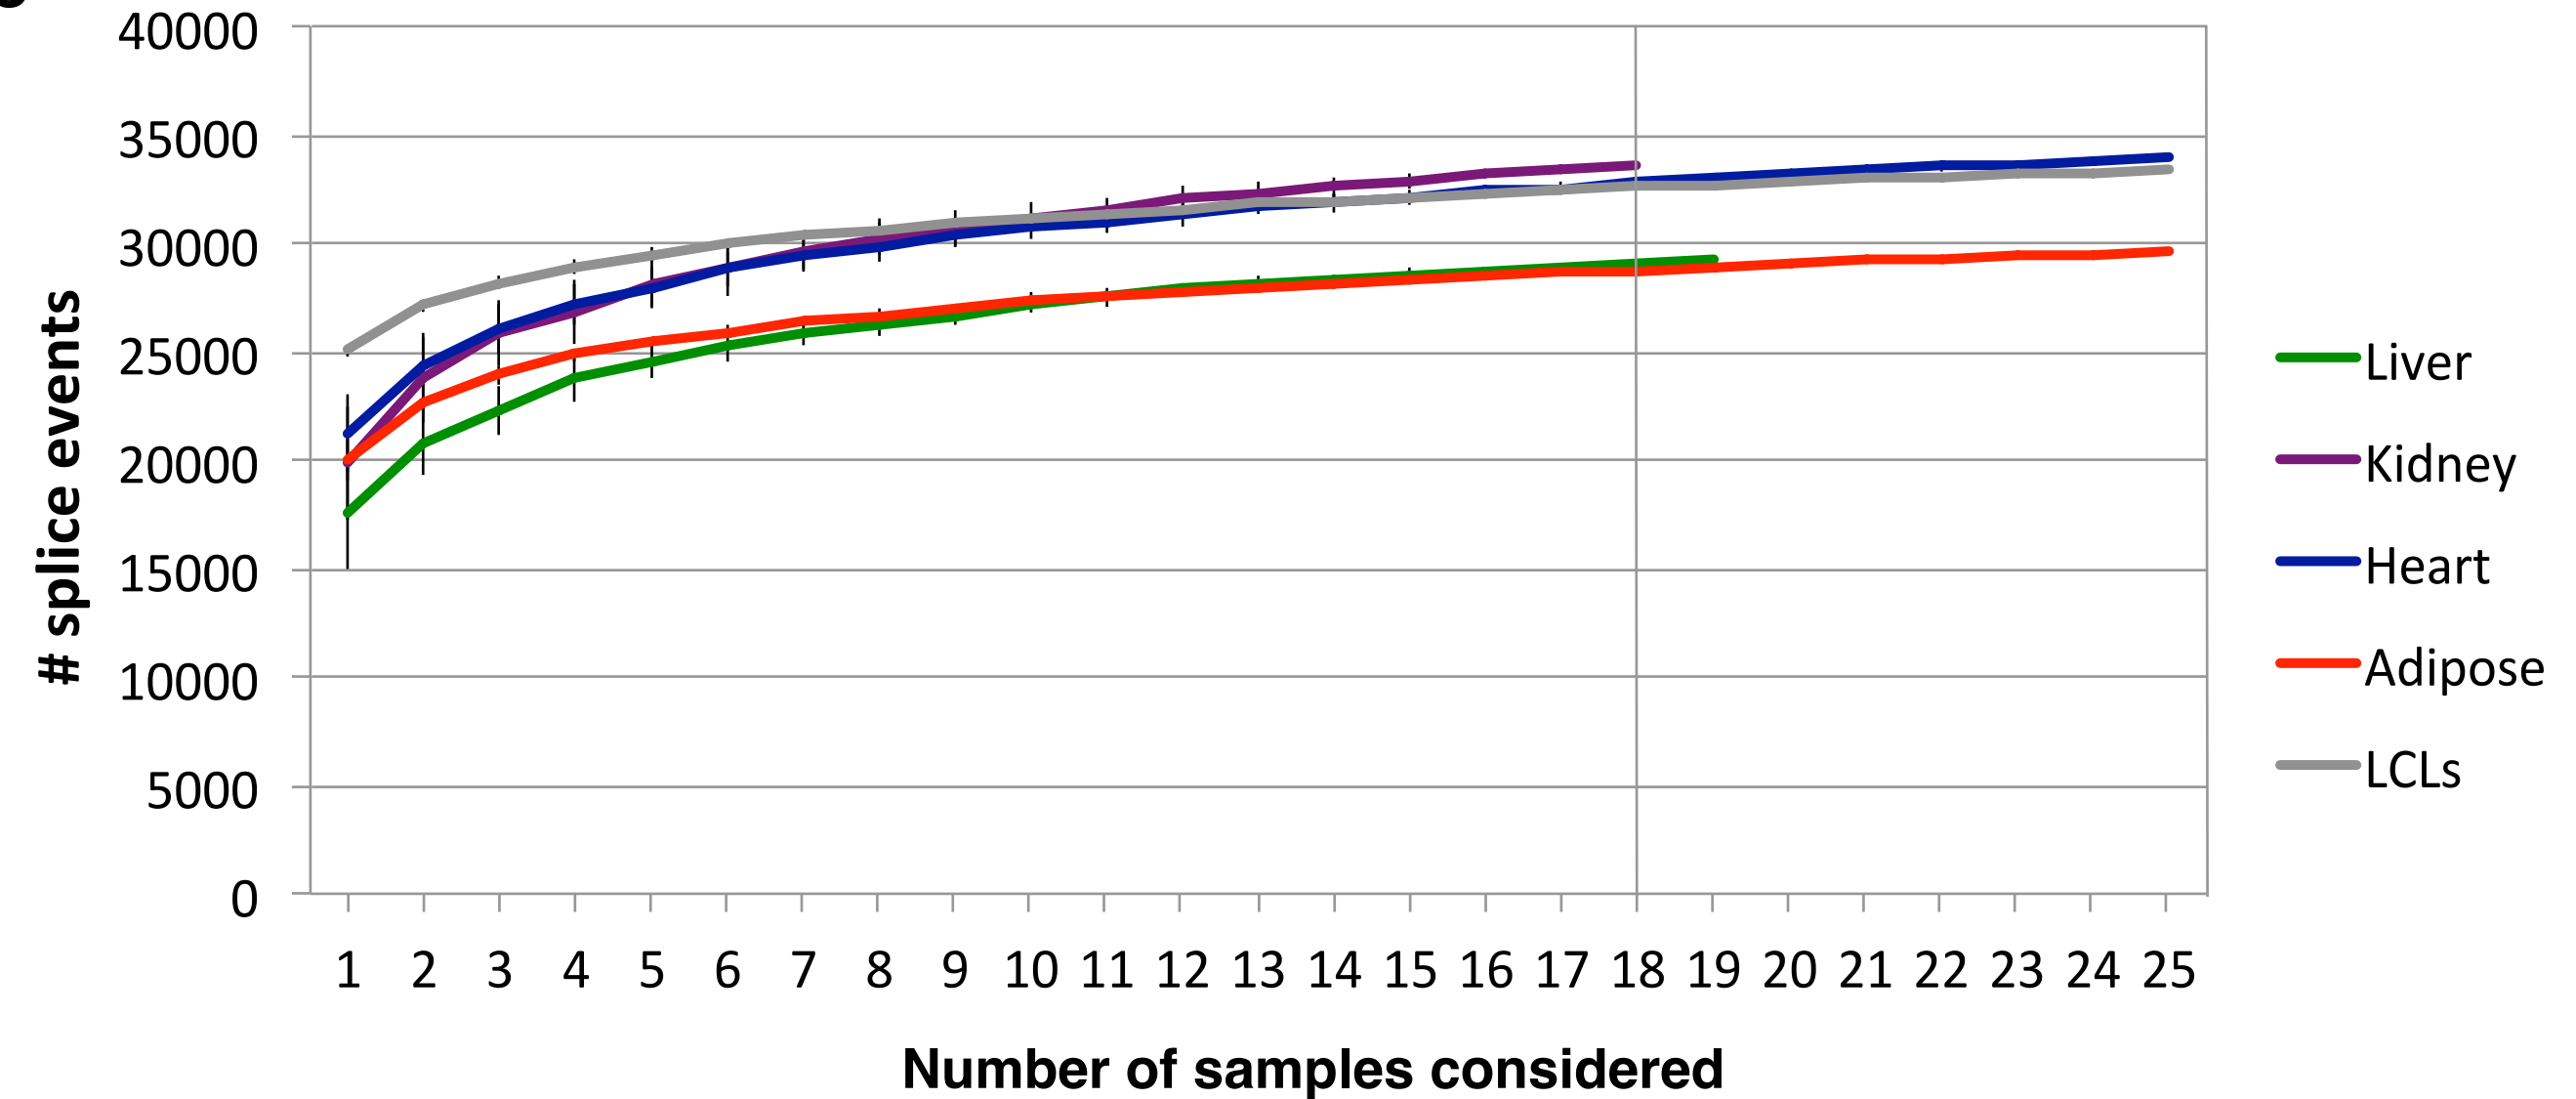

**A**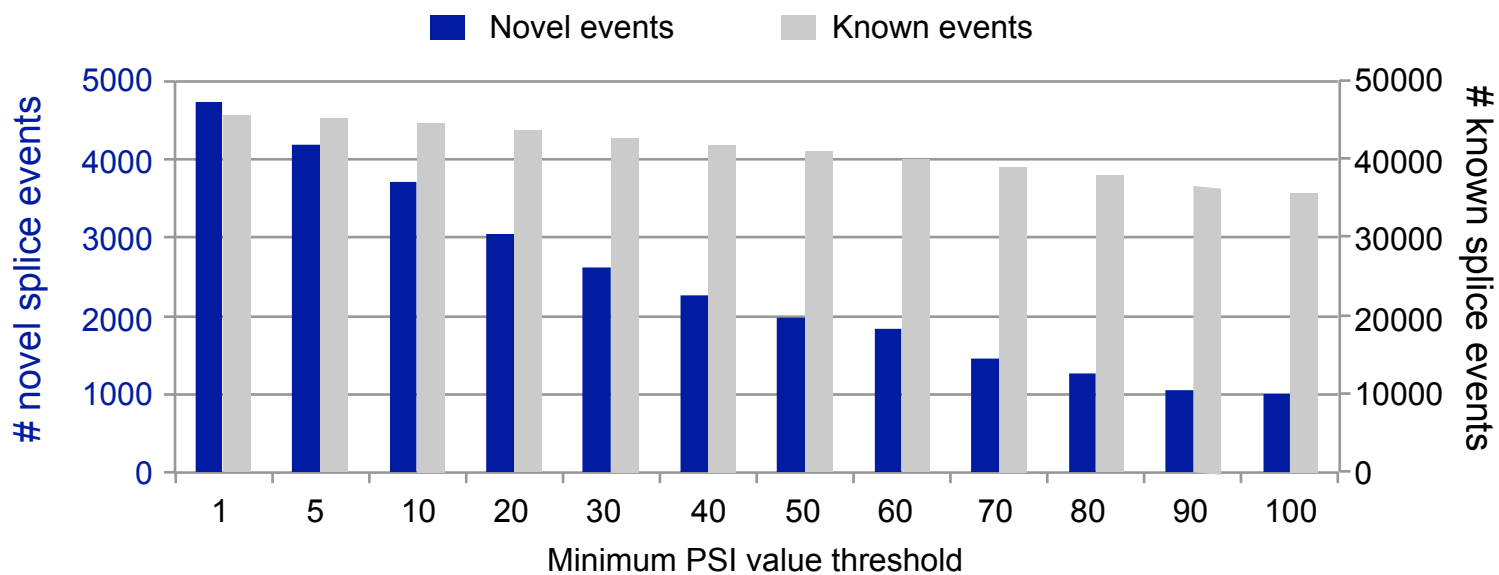**B**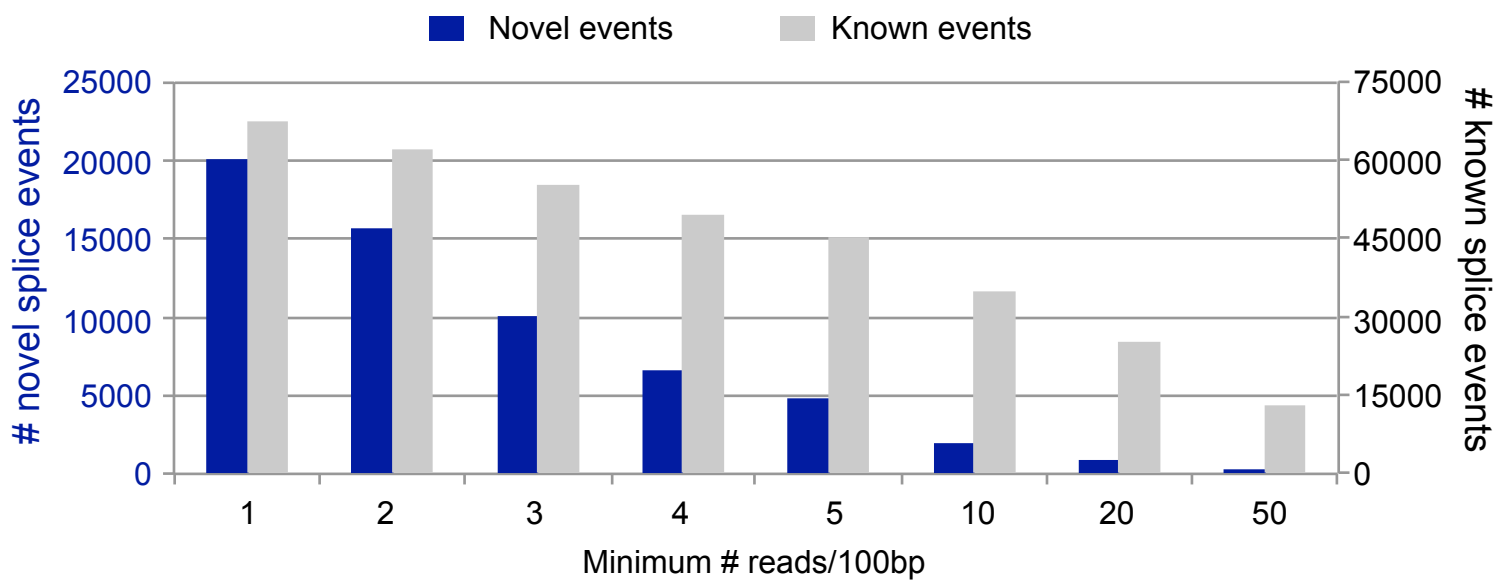



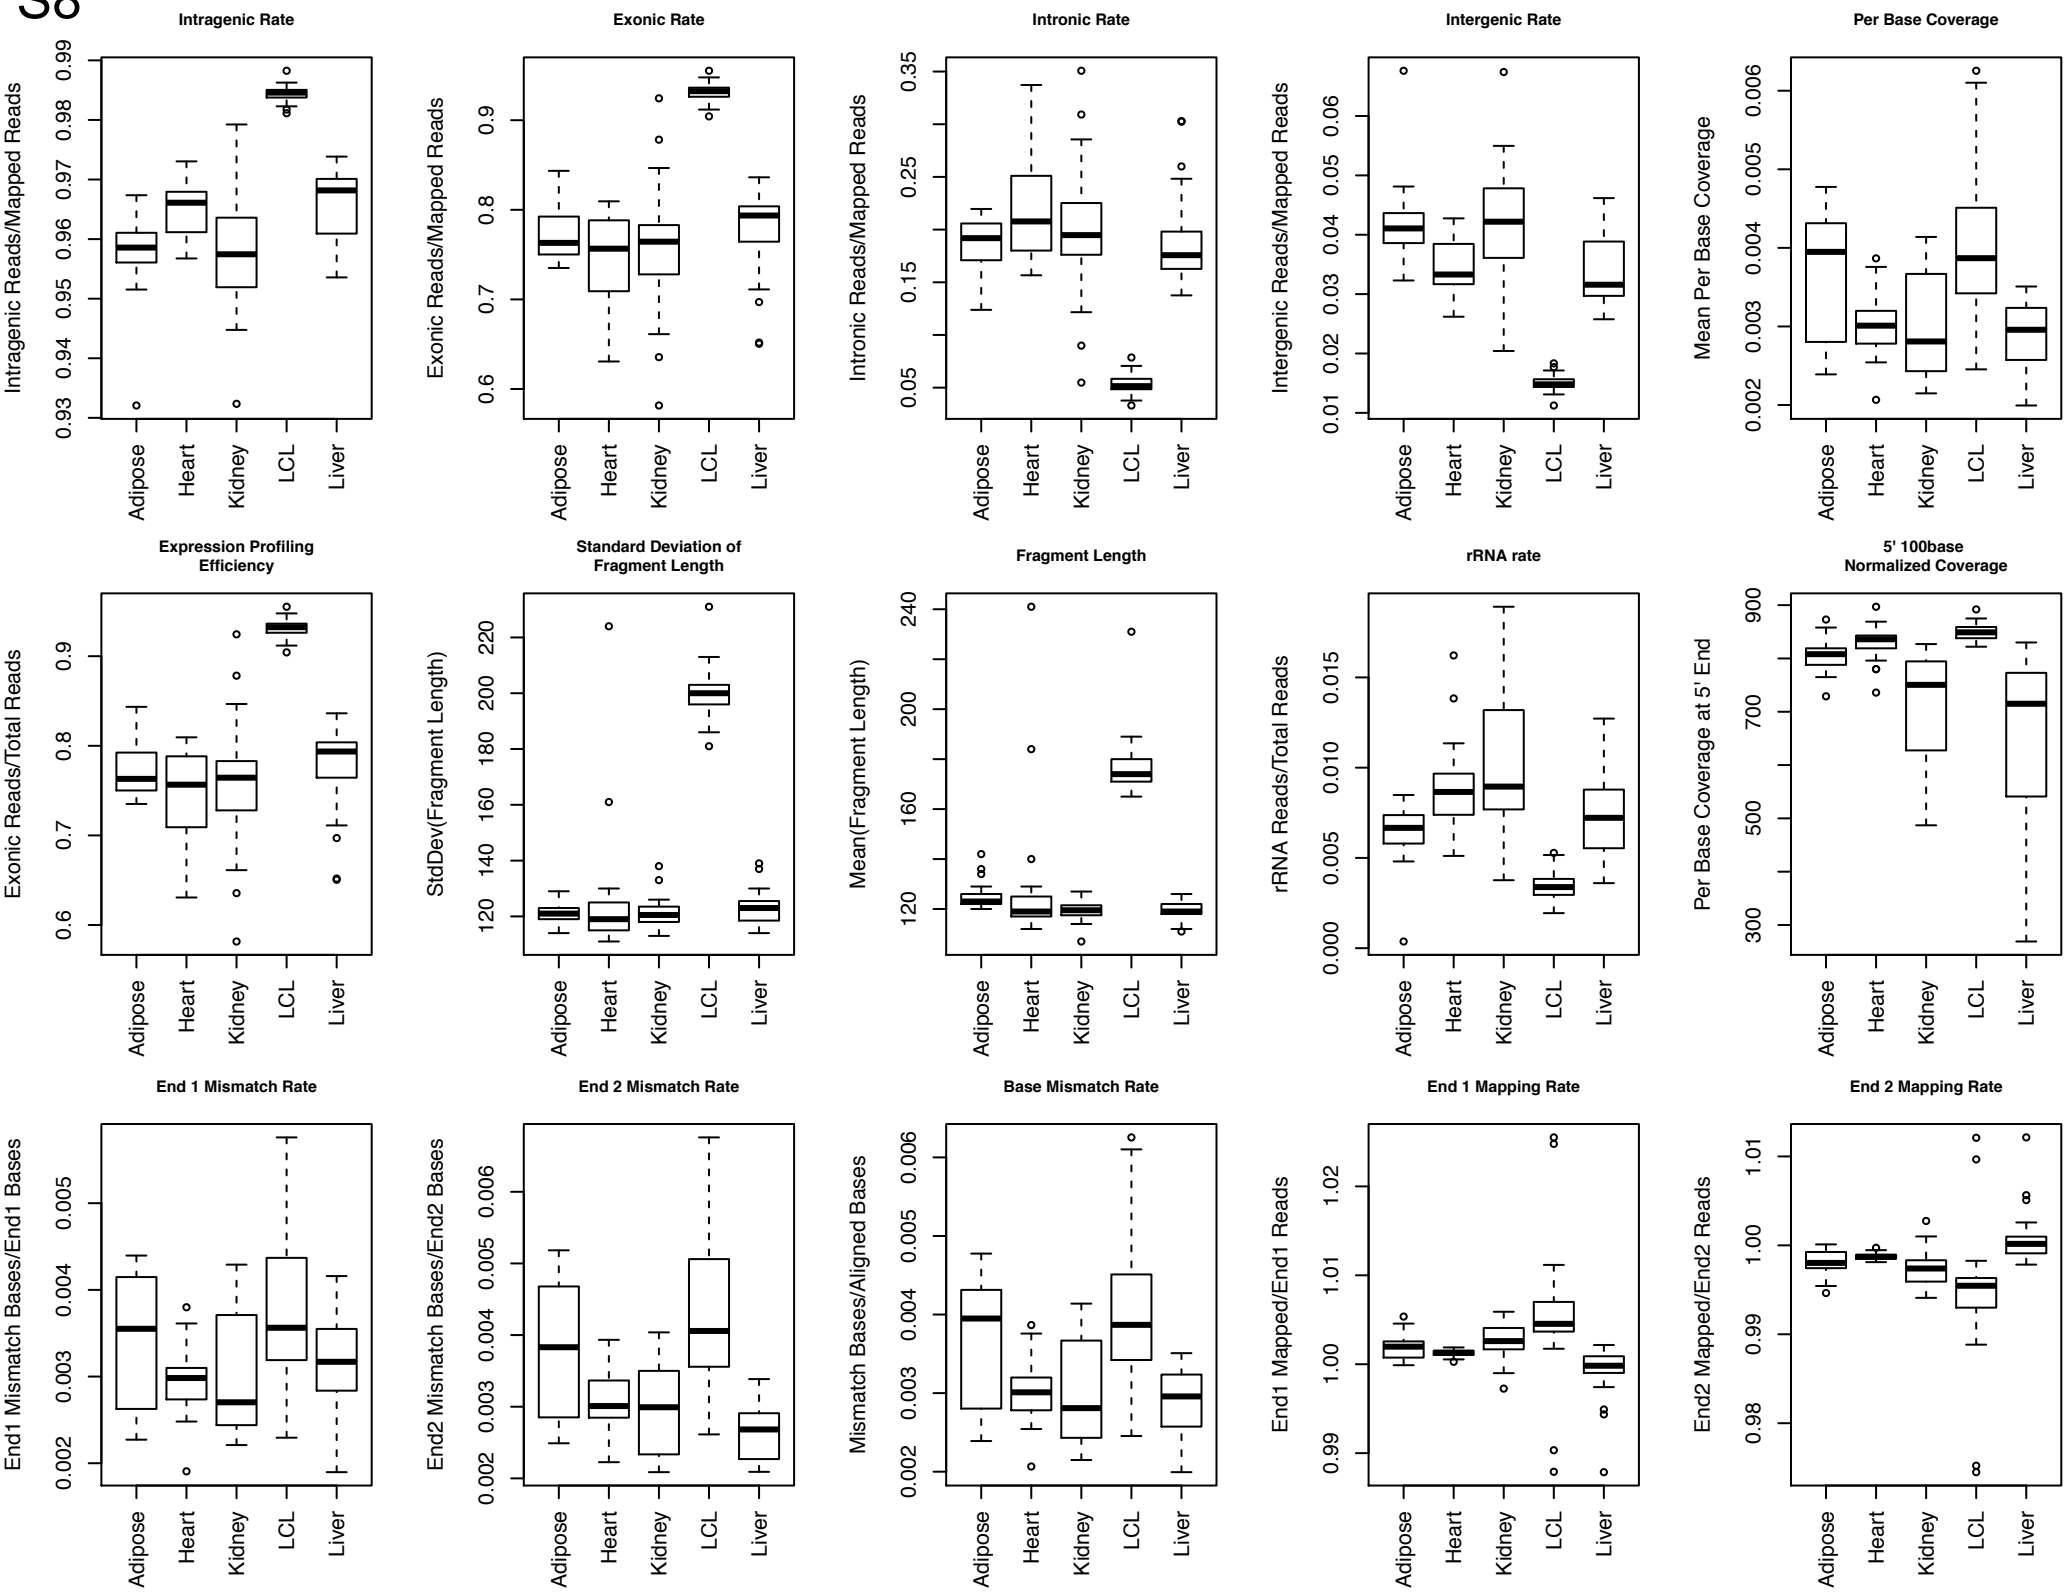

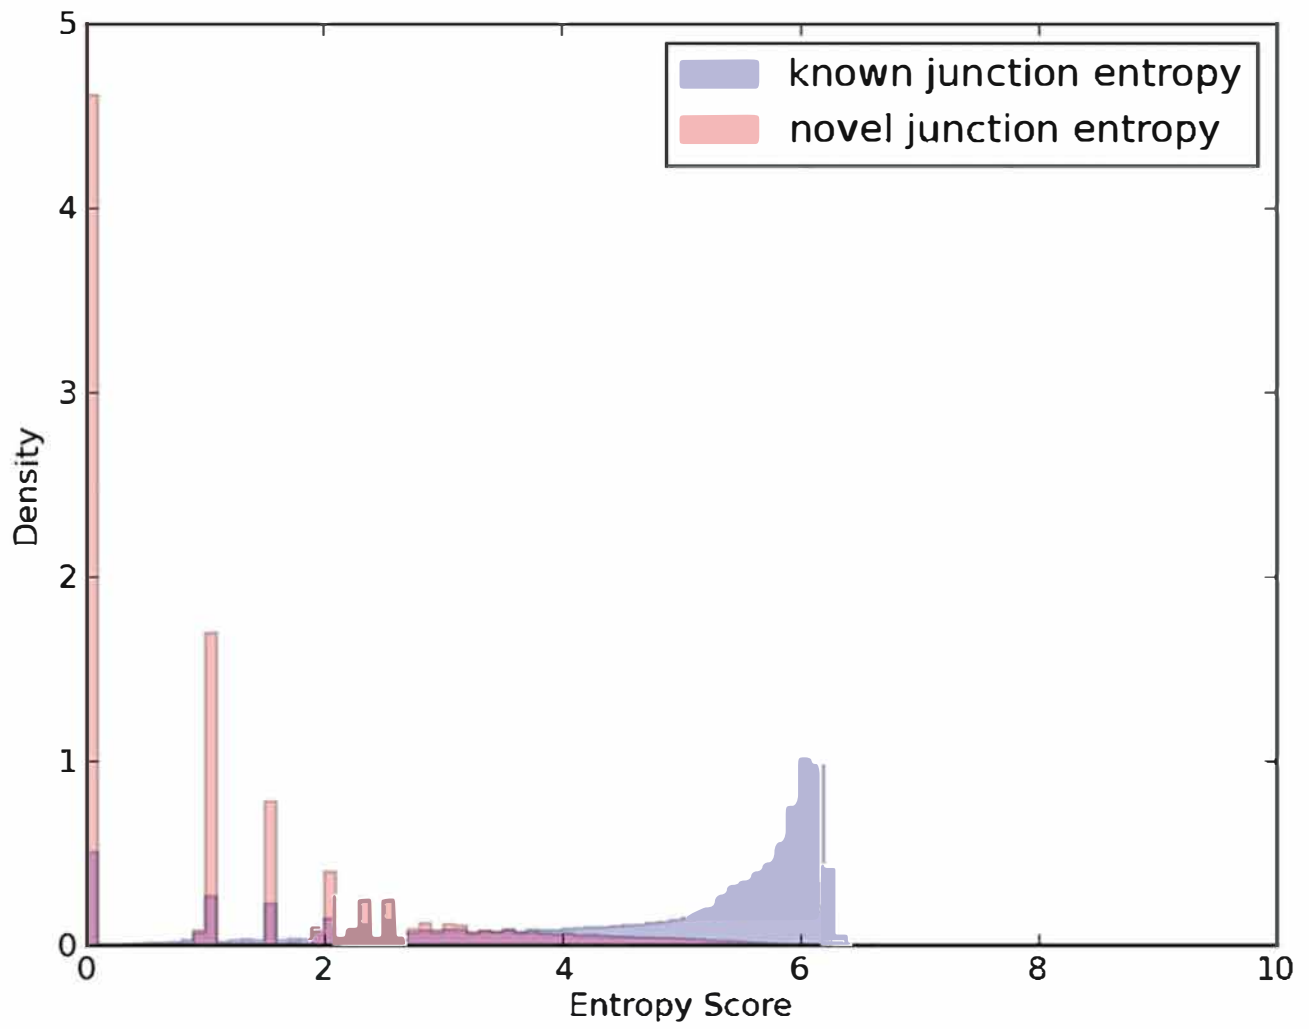

S10

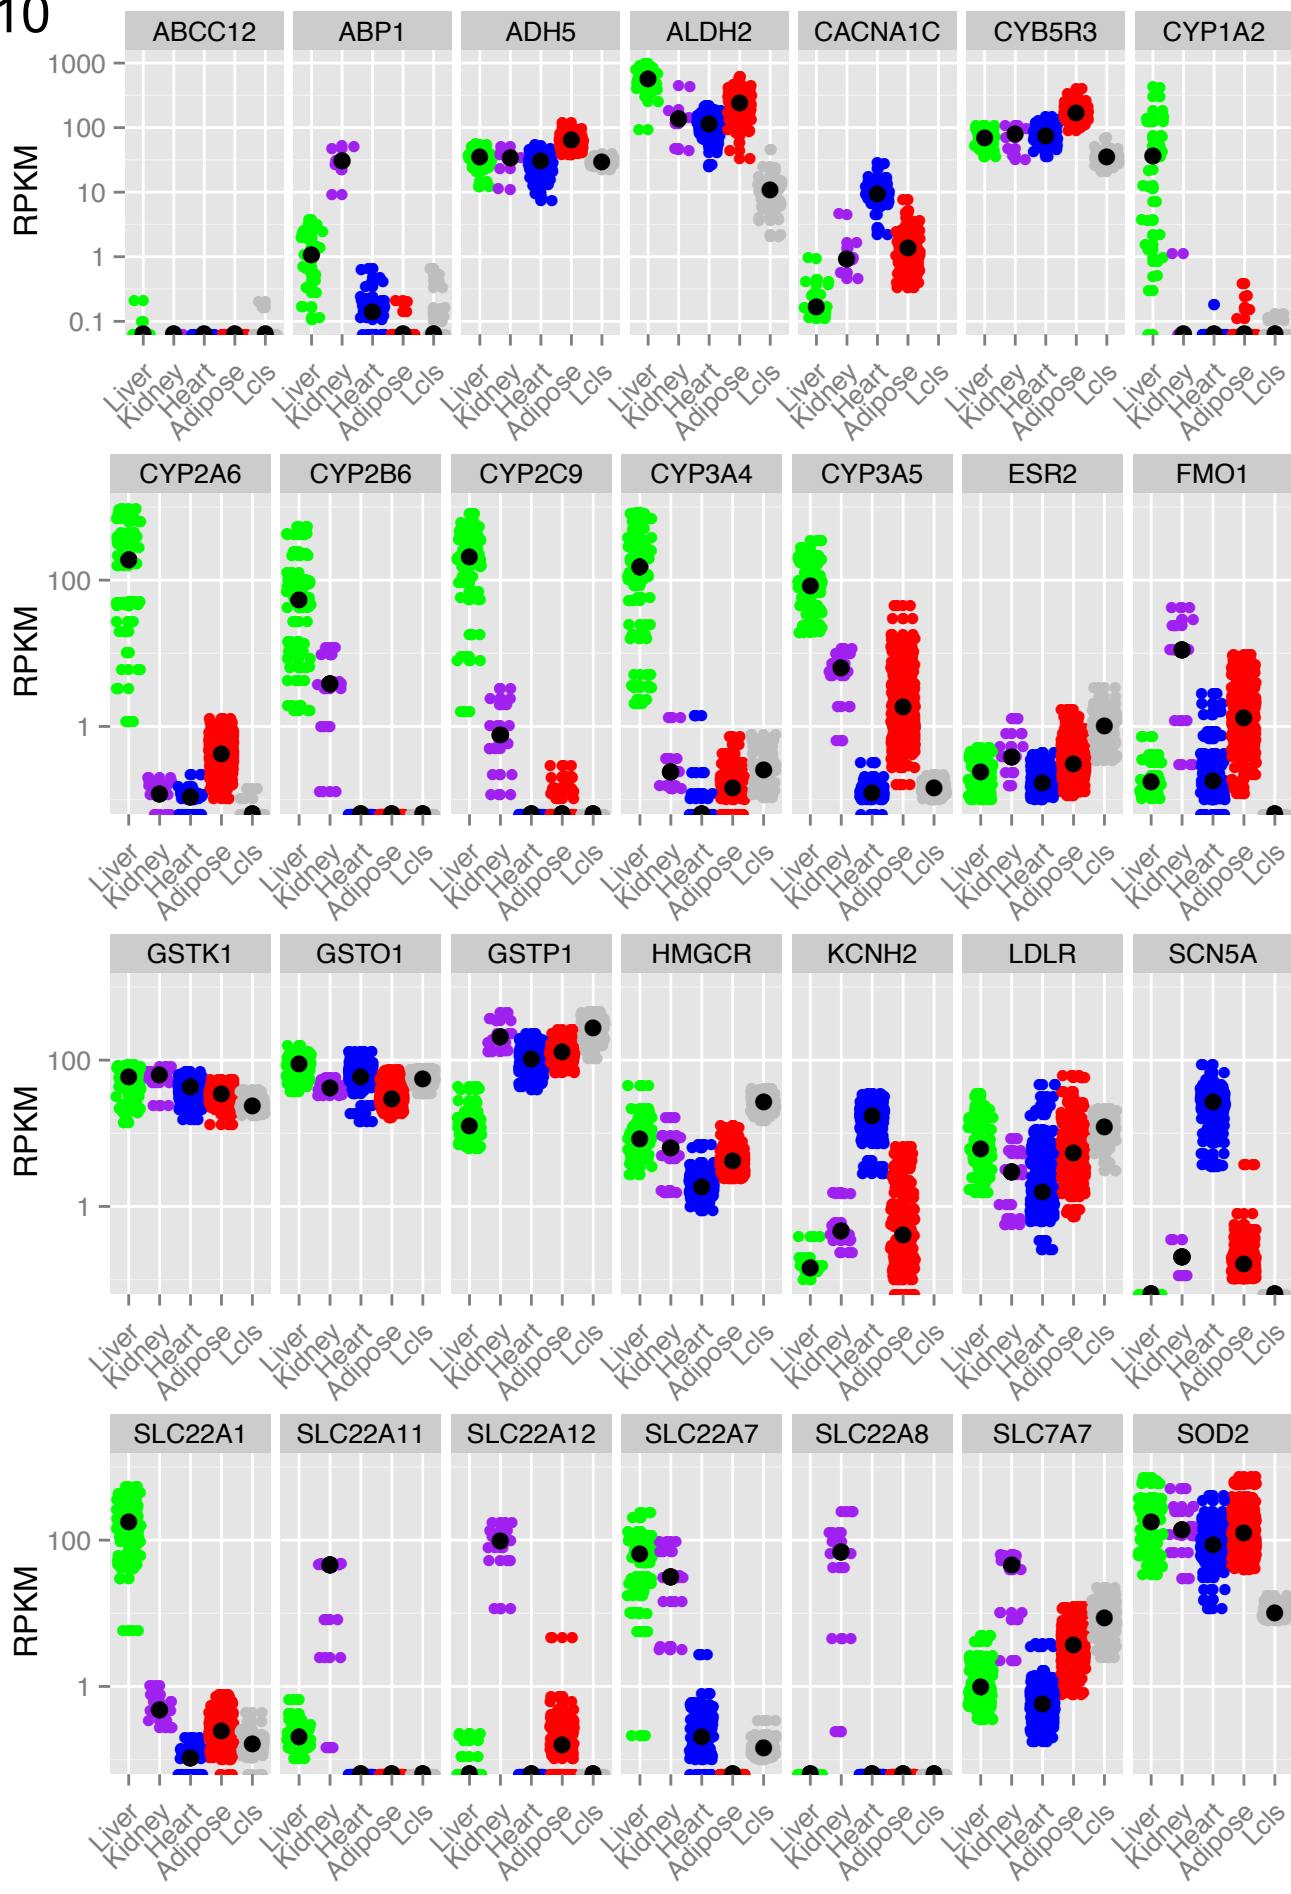

**Supplemental Table S1.** List of 389 pharmacogenes and their categories based on their functions. Annotation for drug target is compiled from Rask-Anderson, M et al. The druggable genome: Evaluation of drug targets in clinical trials suggests major shifts in molecular class and indication. *Annu Rev Pharmacol Toxicol.* 54, 9-26 (2014).

| Number | Gene       | Ensembl Gene ID    | Category         | Drug Target | GPCR as Drug Target | Enzyme as Drug Target | Ion Channel as Drug Target |
|--------|------------|--------------------|------------------|-------------|---------------------|-----------------------|----------------------------|
| 1      | ABCA1      | ENSG00000165029.11 | ABC_Transporter  | N           | N                   | N                     | N                          |
| 2      | ABCA4      | ENSG00000198691.6  | ABC_Transporter  | Y           | N                   | N                     | N                          |
| 3      | ABCB1      | ENSG00000085563.8  | ABC_Transporter  | Y           | N                   | N                     | N                          |
| 4      | ABCB10     | ENSG00000135776.4  | ABC_Transporter  | N           | N                   | N                     | N                          |
| 5      | ABCB11     | ENSG00000073734.8  | ABC_Transporter  | N           | N                   | N                     | N                          |
| 6      | ABCB4      | ENSG00000005471.11 | ABC_Transporter  | N           | N                   | N                     | N                          |
| 7      | ABCB5      | ENSG00000004846.12 | ABC_Transporter  | N           | N                   | N                     | N                          |
| 8      | ABCB6      | ENSG00000115657.7  | ABC_Transporter  | N           | N                   | N                     | N                          |
| 9      | ABCB7      | ENSG00000131269.10 | ABC_Transporter  | N           | N                   | N                     | N                          |
| 10     | ABCB8      | ENSG00000197150.7  | ABC_Transporter  | N           | N                   | N                     | N                          |
| 11     | ABCB9      | ENSG00000150967.12 | ABC_Transporter  | N           | N                   | N                     | N                          |
| 12     | ABCC1      | ENSG00000103222.13 | ABC_Transporter  | Y           | N                   | N                     | N                          |
| 13     | ABCC10     | ENSG00000124574.9  | ABC_Transporter  | N           | N                   | N                     | N                          |
| 14     | ABCC12     | ENSG00000140798.10 | ABC_Transporter  | N           | N                   | N                     | N                          |
| 15     | ABCC2      | ENSG00000023839.6  | ABC_Transporter  | Y           | N                   | N                     | N                          |
| 16     | ABCC3      | ENSG00000108846.11 | ABC_Transporter  | N           | N                   | N                     | N                          |
| 17     | ABCC4      | ENSG00000125257.9  | ABC_Transporter  | N           | N                   | N                     | N                          |
| 18     | ABCC5      | ENSG00000114770.11 | ABC_Transporter  | N           | N                   | N                     | N                          |
| 19     | ABCC6      | ENSG00000091262.9  | ABC_Transporter  | N           | N                   | N                     | N                          |
| 20     | ABCC8      | ENSG00000006071.6  | ABC_Transporter  | Y           | N                   | N                     | N                          |
| 21     | ABCC9      | ENSG00000069431.6  | ABC_Transporter  | N           | N                   | N                     | N                          |
| 22     | ABCG2      | ENSG00000118777.6  | ABC_Transporter  | N           | N                   | N                     | N                          |
| 23     | ABCG8      | ENSG00000143921.6  | ABC_Transporter  | N           | N                   | N                     | N                          |
| 24     | ABP1       | ENSG00000002726.14 | Other_Metabolism | N           | N                   | N                     | N                          |
| 25     | AC008537.2 | ENSG00000256612.1  | Other            | N           | N                   | N                     | N                          |
| 26     | ACE        | ENSG00000159640.8  | Other            | Y           | N                   | Y                     | N                          |
| 27     | ADD1       | ENSG00000087274.11 | Other            | N           | N                   | N                     | N                          |
| 28     | ADH1A      | ENSG00000187758.3  | ADH_Metabolism   | Y           | N                   | Y                     | N                          |
| 29     | ADH1B      | ENSG00000196616.7  | ADH_Metabolism   | Y           | N                   | Y                     | N                          |
| 30     | ADH1C      | ENSG00000248144.1  | ADH_Metabolism   | Y           | N                   | Y                     | N                          |
| 31     | ADH4       | ENSG00000198099.4  | ADH_Metabolism   | N           | N                   | Y                     | N                          |
| 32     | ADH5       | ENSG00000197894.6  | ADH_Metabolism   | N           | N                   | Y                     | N                          |
| 33     | ADH6       | ENSG00000172955.13 | ADH_Metabolism   | N           | N                   | Y                     | N                          |
| 34     | ADH7       | ENSG00000196344.7  | ADH_Metabolism   | N           | N                   | Y                     | N                          |
| 35     | ADRA1B     | ENSG00000170214.3  | Receptor         | Y           | Y                   | N                     | N                          |
| 36     | ADRA2C     | ENSG00000184160.6  | Receptor         | Y           | Y                   | N                     | N                          |
| 37     | ADRB1      | ENSG00000043591.4  | Receptor         | Y           | Y                   | N                     | N                          |

|    |         |                    |                                              |   |   |   |   |
|----|---------|--------------------|----------------------------------------------|---|---|---|---|
| 38 | ADRB2   | ENSG00000169252.4  | Receptor                                     | Y | Y | N | N |
| 39 | ADRB3   | ENSG00000188778.3  | Receptor                                     | Y | Y | N | N |
| 40 | AGTR1   | ENSG00000144891.13 | Receptor<br>Nuclear                          | Y | Y | N | N |
| 41 | AHR     | ENSG00000106546.8  | Receptor/Transcripti<br>on Factor            | N | N | N | N |
| 42 | AKAP9   | ENSG00000127914.11 | Other                                        | N | N | N | N |
| 43 | ALB     | ENSG00000163631.11 | Other                                        | N | N | N | N |
| 44 | ALDH1A1 | ENSG00000165092.7  | ALDH_Metabolism                              | N | N | Y | N |
| 45 | ALDH2   | ENSG00000111275.6  | ALDH_Metabolism                              | Y | N | Y | N |
| 46 | ALDH3A1 | ENSG00000108602.12 | ALDH_Metabolism                              | N | N | Y | N |
| 47 | ALDH3A2 | ENSG00000072210.12 | ALDH_Metabolism                              | N | N | Y | N |
| 48 | ALDH4A1 | ENSG00000159423.11 | ALDH_Metabolism                              | N | N | Y | N |
| 49 | ALDH5A1 | ENSG00000112294.8  | ALDH_Metabolism                              | N | N | Y | N |
| 50 | ALDH6A1 | ENSG00000119711.8  | ALDH_Metabolism                              | N | N | Y | N |
| 51 | ALOX5   | ENSG00000012779.5  | Other                                        | Y | N | N | N |
| 52 | AOX1    | ENSG00000138356.9  | Other_Metabolism                             | N | N | N | N |
| 53 | APOA1   | ENSG00000118137.5  | Other                                        | Y | N | N | N |
| 54 | APOA2   | ENSG00000158874.6  | Other                                        | N | N | N | N |
| 55 | APOA4   | ENSG00000110244.5  | Other                                        | N | N | N | N |
| 56 | APOB    | ENSG00000084674.8  | Other                                        | Y | N | N | N |
| 57 | APOE    | ENSG00000130203.4  | Other                                        | N | N | N | N |
| 58 | ARID5B  | ENSG00000150347.10 | Other<br>Nuclear                             | N | N | N | N |
| 59 | ARNT    | ENSG00000143437.14 | Receptor/Transcripti<br>on Factor            | N | N | N | N |
| 60 | ARSA    | ENSG00000100299.12 | Other                                        | N | N | N | N |
| 61 | ATP7A   | ENSG00000165240.12 | Other_Transporter                            | N | N | N | N |
| 62 | ATP7B   | ENSG00000123191.9  | Other_Transporter                            | N | N | N | N |
| 63 | BDKRB2  | ENSG00000168398.5  | Receptor                                     | Y | Y | N | N |
| 64 | BDNF    | ENSG00000176697.12 | Other                                        | N | N | N | N |
| 65 | BRCA1   | ENSG00000012048.13 | Other                                        | N | N | N | N |
| 66 | BRCA2   | ENSG00000139618.9  | Other                                        | N | N | N | N |
| 67 | CACNA1C | ENSG00000151067.14 | Channel                                      | Y | N | N | Y |
| 68 | CACNA1S | ENSG00000081248.6  | Channel                                      | Y | N | N | Y |
| 69 | CACNB2  | ENSG00000165995.14 | Channel                                      | Y | N | N | Y |
| 70 | CBR1    | ENSG00000159228.8  | Other_Metabolism                             | N | N | N | N |
| 71 | CBR3    | ENSG00000159231.5  | Other_Metabolism                             | N | N | N | N |
| 72 | CCDC101 | ENSG00000176476.4  | Other                                        | N | N | N | N |
| 73 | CCND1   | ENSG00000110092.2  | Other                                        | Y | N | N | N |
| 74 | CDA     | ENSG00000158825.5  | Other_Metabolism<br>Nuclear                  | N | N | N | N |
| 75 | CEBPA   | ENSG00000245848.2  | Receptor/Transcripti<br>on Factor<br>Nuclear | N | N | N | N |
| 76 | CEBPB   | ENSG00000172216.4  | Receptor/Transcripti<br>on Factor            | N | N | N | N |

|     |         |                    |                  |   |   |   |   |
|-----|---------|--------------------|------------------|---|---|---|---|
| 77  | CES1    | ENSG00000198848.7  | Other_Metabolism | N | N | N | N |
| 78  | CES2    | ENSG00000172831.6  | Other_Metabolism | N | N | N | N |
| 79  | CETP    | ENSG00000087237.6  | Other            | Y | N | N | N |
| 80  | CFTR    | ENSG00000001626    | ABC_Transporter  | Y | Y | N | N |
| 81  | CHRM3   | ENSG00000133019.7  | Receptor         | Y | Y | N | N |
| 82  | CHST1   | ENSG00000175264.3  | Other            | N | N | N | N |
| 83  | CHST10  | ENSG00000115526.6  | Other            | N | N | N | N |
| 84  | CHST11  | ENSG00000171310.6  | Other            | N | N | N | N |
| 85  | CHST13  | ENSG00000180767.4  | Other            | N | N | N | N |
| 86  | CHST2   | ENSG00000175040.4  | Other            | N | N | N | N |
| 87  | CHST3   | ENSG00000122863.5  | Other            | N | N | N | N |
| 88  | CHST4   | ENSG00000140835.7  | Other            | N | N | N | N |
| 89  | CHST5   | ENSG00000135702.10 | Other            | N | N | N | N |
| 90  | CHST6   | ENSG00000183196.4  | Other            | N | N | N | N |
| 91  | CHST7   | ENSG00000147119.3  | Other            | N | N | N | N |
| 92  | CHST8   | ENSG00000124302.5  | Other            | N | N | N | N |
| 93  | CHST9   | ENSG00000154080.7  | Other            | N | N | N | N |
| 94  | COL1A1  | ENSG00000108821.8  | Other            | Y | N | N | N |
| 95  | COMT    | ENSG00000093010.7  | Other_Metabolism | Y | N | Y | N |
| 96  | CR1     | ENSG00000203710.5  | Receptor         | N | N | N | N |
| 97  | CRHR1   | ENSG00000120088.9  | Receptor         | Y | Y | N | N |
| 98  | CROT    | ENSG00000005469.7  | Other            | Y | N | N | N |
| 99  | CYB5A   | ENSG00000166347.12 | Other_Metabolism | N | N | N | N |
| 100 | CYB5B   | ENSG00000103018.11 | Other_Metabolism | N | N | N | N |
| 101 | CYB5R3  | ENSG00000100243.15 | Other_Metabolism | N | N | N | N |
| 102 | CYP11A1 | ENSG00000140459.11 | CYP_Metabolism   | N | N | N | N |
| 103 | CYP11B1 | ENSG00000160882.7  | CYP_Metabolism   | Y | N | Y | N |
| 104 | CYP11B2 | ENSG00000179142.2  | CYP_Metabolism   | N | N | N | N |
| 105 | CYP17A1 | ENSG00000148795.4  | CYP_Metabolism   | Y | N | Y | N |
| 106 | CYP19A1 | ENSG00000137869.8  | CYP_Metabolism   | Y | N | Y | N |
| 107 | CYP1A1  | ENSG00000140465.8  | CYP_Metabolism   | N | N | N | N |
| 108 | CYP1A2  | ENSG00000140505.6  | CYP_Metabolism   | N | N | N | N |
| 109 | CYP1B1  | ENSG00000138061.7  | CYP_Metabolism   | Y | N | Y | N |
| 110 | CYP20A1 | ENSG00000119004.9  | CYP_Metabolism   | N | N | N | N |
| 111 | CYP21A2 | ENSG00000231852.2  | CYP_Metabolism   | N | N | N | N |
| 112 | CYP24A1 | ENSG00000019186.5  | CYP_Metabolism   | Y | N | Y | N |
| 113 | CYP26A1 | ENSG00000095596.7  | CYP_Metabolism   | Y | N | Y | N |
| 114 | CYP26C1 | ENSG00000187553.5  | CYP_Metabolism   | Y | N | Y | N |
| 115 | CYP27A1 | ENSG00000135929.4  | CYP_Metabolism   | N | N | N | N |
| 116 | CYP27B1 | ENSG00000111012.4  | CYP_Metabolism   | N | N | N | N |
| 117 | CYP2A13 | ENSG00000197838.3  | CYP_Metabolism   | N | N | N | N |
| 118 | CYP2A6  | ENSG00000255974.1  | CYP_Metabolism   | N | N | N | N |
| 119 | CYP2A7  | ENSG00000198077.5  | CYP_Metabolism   | N | N | N | N |

|     |         |                    |                  |   |   |   |   |
|-----|---------|--------------------|------------------|---|---|---|---|
| 120 | CYP2B6  | ENSG00000197408.3  | CYP_Metabolism   | N | N | N | N |
| 121 | CYP2C18 | ENSG00000108242.7  | CYP_Metabolism   | N | N | N | N |
| 122 | CYP2C19 | ENSG00000165841.5  | CYP_Metabolism   | N | N | N | N |
| 123 | CYP2C8  | ENSG00000138115.7  | CYP_Metabolism   | N | N | N | N |
| 124 | CYP2C9  | ENSG00000138109.8  | CYP_Metabolism   | N | N | N | N |
| 125 | CYP2D6  | ENSG00000100197.15 | CYP_Metabolism   | N | N | N | N |
| 126 | CYP2E1  | ENSG00000130649.5  | CYP_Metabolism   | N | N | N | N |
| 127 | CYP2F1  | ENSG00000197446.3  | CYP_Metabolism   | N | N | N | N |
| 128 | CYP2J2  | ENSG00000134716.5  | CYP_Metabolism   | N | N | N | N |
| 129 | CYP2R1  | ENSG00000186104.6  | CYP_Metabolism   | N | N | N | N |
| 130 | CYP2S1  | ENSG00000167600.7  | CYP_Metabolism   | N | N | N | N |
| 131 | CYP3A1  | ENSG00000146233.3  | CYP_Metabolism   | N | N | N | N |
| 132 | CYP3A4  | ENSG00000160868.9  | CYP_Metabolism   | Y | N | Y | N |
| 133 | CYP3A43 | ENSG00000021461.11 | CYP_Metabolism   | N | N | N | N |
| 134 | CYP3A5  | ENSG00000106258.9  | CYP_Metabolism   | Y | N | Y | N |
| 135 | CYP3A7  | ENSG00000160870.7  | CYP_Metabolism   | Y | N | Y | N |
| 136 | CYP4A1  | ENSG00000036530.4  | CYP_Metabolism   | Y | N | Y | N |
| 137 | CYP4A11 | ENSG00000187048.8  | CYP_Metabolism   | N | N | N | N |
| 138 | CYP4B1  | ENSG00000142973.8  | CYP_Metabolism   | N | N | N | N |
| 139 | CYP4F11 | ENSG00000171903.10 | CYP_Metabolism   | N | N | N | N |
| 140 | CYP4F12 | ENSG00000186204.8  | CYP_Metabolism   | N | N | N | N |
| 141 | CYP4F2  | ENSG00000186115.5  | CYP_Metabolism   | N | N | N | N |
| 142 | CYP4F3  | ENSG00000186529.7  | CYP_Metabolism   | N | N | N | N |
| 143 | CYP4F8  | ENSG00000186526.6  | CYP_Metabolism   | N | N | N | N |
| 144 | CYP4Z1  | ENSG00000186160.4  | CYP_Metabolism   | N | N | N | N |
| 145 | CYP51A1 | ENSG00000001630.10 | CYP_Metabolism   | N | N | N | N |
| 146 | CYP7A1  | ENSG00000167910.3  | CYP_Metabolism   | N | N | N | N |
| 147 | CYP7B1  | ENSG00000172817.3  | CYP_Metabolism   | N | N | N | N |
| 148 | CYP8B1  | ENSG00000180432.4  | CYP_Metabolism   | N | N | N | N |
| 149 | DBH     | ENSG00000123454.5  | Other_Metabolism | Y | N | Y | N |
| 150 | DCK     | ENSG00000156136.5  | Other_Metabolism | Y | N | Y | N |
| 151 | DHFR    | ENSG000000228716.2 | Other_Metabolism | Y | N | Y | N |
| 152 | DPYD    | ENSG00000188641.8  | Other_Metabolism | Y | N | Y | N |
| 153 | DRD1    | ENSG00000184845.2  | Receptor         | Y | Y | N | N |
| 154 | DRD2    | ENSG00000149295.9  | Receptor         | Y | Y | N | N |
| 155 | DRD3    | ENSG00000151577.6  | Receptor         | Y | Y | N | N |
| 156 | DRD4    | ENSG00000069696.6  | Receptor         | Y | Y | N | N |
| 157 | DRD5    | ENSG00000169676.4  | Receptor         | Y | Y | N | N |
| 158 | EGFR    | ENSG00000146648.10 | Receptor         | Y | N | N | N |
| 159 | EPHX1   | ENSG00000143819.8  | Other_Metabolism | Y | N | Y | N |
| 160 | EPHX2   | ENSG00000120915.8  | Other_Metabolism | Y | N | Y | N |
| 161 | ESR1    | ENSG00000091831.15 | Receptor         | Y | N | N | N |
| 162 | ESR2    | ENSG00000140009.14 | Receptor         | Y | N | N | N |

|     |        |                    |                                              |   |   |   |   |
|-----|--------|--------------------|----------------------------------------------|---|---|---|---|
| 163 | F2     | ENSG00000180210.9  | Other                                        | Y | N | N | N |
| 164 | F5     | ENSG00000198734.6  | Other                                        | Y | N | N | N |
| 165 | FAAH   | ENSG00000117480.10 | Other_Metabolism                             | Y | N | Y | N |
| 166 | FCGR2A | ENSG00000143226.8  | Receptor                                     | N | N | N | N |
| 167 | FCGR3A | ENSG00000203747.5  | Receptor                                     | N | N | N | N |
| 168 | FKBP5  | ENSG00000096060.8  | Other                                        | N | N | N | N |
| 169 | FMO1   | ENSG00000010932.11 | Other_Metabolism                             | N | N | N | N |
| 170 | FMO2   | ENSG00000094963.9  | Other_Metabolism                             | N | N | N | N |
| 171 | FMO3   | ENSG00000007933.8  | Other_Metabolism                             | N | N | N | N |
| 172 | FMO4   | ENSG00000076258.5  | Other_Metabolism                             | N | N | N | N |
| 173 | FMO5   | ENSG00000131781.8  | Other_Metabolism                             | N | N | N | N |
| 174 | FMO6P  | ENSG00000117507.3  | Other_Metabolism                             | N | N | N | N |
| 175 | FOXA3  | ENSG00000170608.1  | Nuclear<br>Receptor/Transcripti<br>on Factor | N | N | N | N |
| 176 | G6PD   | ENSG00000160211.10 | Other_Metabolism                             | N | N | N | N |
| 177 | GLCCI1 | ENSG00000106415.8  | Other                                        | N | N | N | N |
| 178 | GNB3   | ENSG00000111664.6  | Other                                        | N | N | N | N |
| 179 | GPX7   | ENSG00000116157.5  | Other_Metabolism                             | N | N | N | N |
| 180 | GRK4   | ENSG00000125388.14 | Other                                        | N | N | N | N |
| 181 | GRK5   | ENSG00000198873.8  | Other                                        | N | N | N | N |
| 182 | GRM3   | ENSG00000198822.6  | Receptor                                     | Y | Y | N | N |
| 183 | GSR    | ENSG00000104687.8  | Other_Metabolism                             | Y | N | Y | N |
| 184 | GSTA1  | ENSG00000243955.1  | GST_Metabolism                               | N | N | N | N |
| 185 | GSTA2  | ENSG00000244067.1  | GST_Metabolism                               | N | N | N | N |
| 186 | GSTA3  | ENSG00000174156.7  | GST_Metabolism                               | N | N | N | N |
| 187 | GSTA4  | ENSG00000170899.6  | GST_Metabolism                               | N | N | N | N |
| 188 | GSTA5  | ENSG00000182793.5  | GST_Metabolism                               | N | N | N | N |
| 189 | GSTK1  | ENSG00000197448.9  | GST_Metabolism                               | N | N | N | N |
| 190 | GSTM1  | ENSG00000134184.7  | GST_Metabolism                               | N | N | N | N |
| 191 | GSTM2  | ENSG00000213366.6  | GST_Metabolism                               | N | N | N | N |
| 192 | GSTM3  | ENSG00000134202.6  | GST_Metabolism                               | N | N | N | N |
| 193 | GSTM4  | ENSG00000168765.10 | GST_Metabolism                               | N | N | N | N |
| 194 | GSTM5  | ENSG00000134201.5  | GST_Metabolism                               | N | N | N | N |
| 195 | GSTO1  | ENSG00000148834.8  | GST_Metabolism                               | N | N | N | N |
| 196 | GSTO2  | ENSG00000065621.8  | GST_Metabolism                               | N | N | N | N |
| 197 | GSTP1  | ENSG00000084207.11 | GST_Metabolism                               | Y | N | Y | N |
| 198 | GSTT1  | ENSG00000184674.7  | GST_Metabolism                               | N | N | N | N |
| 199 | GSTT2  | ENSG00000099984.6  | GST_Metabolism                               | N | N | N | N |
| 200 | GSTZ1  | ENSG00000100577.14 | GST_Metabolism                               | N | N | N | N |
| 201 | HLA-B  | ENSG00000234745.3  | Other                                        | N | N | N | N |
| 202 | HMGCR  | ENSG00000113161.10 | Other                                        | Y | N | N | N |
| 203 | HNF1A  | ENSG00000135100.9  | Nuclear<br>Receptor/Transcripti<br>on Factor | N | N | N | N |



|     |         |                    |                                              |   |   |   |   |
|-----|---------|--------------------|----------------------------------------------|---|---|---|---|
| 204 | HNF4A   | ENSG00000101076.10 | Nuclear<br>Receptor/Transcripti<br>on Factor | N | N | N | N |
| 205 | HNMT    | ENSG00000150540.9  | Other_Metabolism                             | N | N | N | N |
| 206 | HSD11B2 | ENSG00000176387.5  | Other_Metabolism                             | N | N | N | N |
| 207 | HTR1A   | ENSG00000178394.3  | Receptor                                     | Y | Y | N | N |
| 208 | HTR2A   | ENSG00000102468.5  | Receptor                                     | Y | Y | N | N |
| 209 | IL10    | ENSG00000136634.5  | Other                                        | N | N | N | N |
| 210 | IL1B    | ENSG00000125538.7  | Other                                        | Y | N | N | N |
| 211 | IL28B   | ENSG00000197110    | Other                                        | N | N | N | N |
| 212 | INPP1   | ENSG00000151689.8  | Other                                        | N | N | N | N |
| 213 | JUN     | ENSG00000177606.5  | Nuclear<br>Receptor/Transcripti<br>on Factor | Y | N | N | N |
| 214 | KCNE1   | ENSG00000180509.7  | Channel                                      | Y | N | N | Y |
| 215 | KCNE2   | ENSG00000159197.2  | Channel                                      | N | N | N | N |
| 216 | KCNH2   | ENSG00000055118.9  | Channel                                      | Y | N | N | Y |
| 217 | KCNJ11  | ENSG00000187486.5  | Channel                                      | Y | N | N | Y |
| 218 | KCNQ1   | ENSG00000053918.10 | Channel                                      | Y | N | N | Y |
| 219 | LDLR    | ENSG00000130164.6  | Receptor                                     | N | N | N | N |
| 220 | LPL     | ENSG00000175445.9  | Other                                        | Y | N | N | N |
| 221 | LTC4S   | ENSG00000213316.5  | Other                                        | N | N | N | N |
| 222 | MAOA    | ENSG00000189221.5  | Other_Metabolism                             | Y | N | Y | N |
| 223 | MAOB    | ENSG00000069535.11 | Other_Metabolism                             | Y | N | Y | N |
| 224 | MAT1A   | ENSG00000151224.7  | Other                                        | N | N | N | N |
| 225 | METTL1  | ENSG00000037897.12 | Other                                        | N | N | N | N |
| 226 | MLH1    | ENSG00000076242.9  | Other                                        | N | N | N | N |
| 227 | MMP3    | ENSG00000149968.7  | Other                                        | Y | N | N | N |
| 228 | MTHFR   | ENSG00000177000.6  | Other_Metabolism                             | N | N | N | N |
| 229 | NAT1    | ENSG00000171428.9  | Other_Metabolism                             | N | N | N | N |
| 230 | NAT2    | ENSG00000156006.4  | Other_Metabolism                             | N | N | N | N |
| 231 | NCOR1   | ENSG00000141027.13 | Nuclear<br>Receptor/Transcripti<br>on Factor | N | N | N | N |
| 232 | NNMT    | ENSG00000166741.3  | Other_Metabolism                             | Y | N | Y | N |
| 233 | NOS3    | ENSG00000164867.5  | Other_Metabolism                             | Y | N | Y | N |
| 234 | NPPB    | ENSG00000120937.7  | Other                                        | N | N | N | N |
| 235 | NPR1    | ENSG00000169418.7  | Receptor                                     | Y | Y | N | N |
| 236 | NQO1    | ENSG00000181019.8  | Other_Metabolism                             | Y | N | Y | N |
| 237 | NQO2    | ENSG00000124588.13 | Other_Metabolism                             | Y | N | Y | N |
| 238 | NR0B2   | ENSG00000131910.4  | Nuclear<br>Receptor/Transcripti<br>on Factor | N | N | N | N |
| 239 | NR1H2   | ENSG00000131408.7  | Nuclear<br>Receptor/Transcripti<br>on Factor | N | N | N | N |
| 240 | NR1H3   | ENSG00000025434.14 | Nuclear<br>Receptor/Transcripti<br>on Factor | N | N | N | N |

|     |          |                    |                                              |   |   |   |   |
|-----|----------|--------------------|----------------------------------------------|---|---|---|---|
| 241 | NR1H4    | ENSG00000012504.9  | Nuclear<br>Receptor/Transcripti<br>on Factor | Y | N | N | N |
| 242 | NR1I2    | ENSG00000144852.12 | Nuclear<br>Receptor/Transcripti<br>on Factor | N | N | N | N |
| 243 | NR1I3    | ENSG00000143257.7  | Nuclear<br>Receptor/Transcripti<br>on Factor | N | N | N | N |
| 244 | NR3C1    | ENSG00000113580.9  | Nuclear<br>Receptor/Transcripti<br>on Factor | Y | N | N | N |
| 245 | NR3C2    | ENSG00000151623.9  | Nuclear<br>Receptor/Transcripti<br>on Factor | Y | N | N | N |
| 246 | OPRM1    | ENSG00000112038.12 | Receptor                                     | Y | Y | N | N |
| 247 | ORM1     | ENSG00000229314.4  | Other                                        | N | N | N | N |
| 248 | ORM2     | ENSG00000228278.2  | Other                                        | N | N | N | N |
| 249 | P2RY1    | ENSG00000169860.4  | Receptor                                     | Y | Y | N | N |
| 250 | P2RY12   | ENSG00000169313.8  | Receptor                                     | Y | Y | N | N |
| 251 | PARK2    | ENSG00000185345.13 | Other                                        | N | N | N | N |
| 252 | PEAR1    | ENSG00000187800.9  | Receptor                                     | N | N | N | N |
| 253 | PGAP3    | ENSG00000161395.7  | Other                                        | N | N | N | N |
| 254 | PNMT     | ENSG00000141744.2  | Other_Metabolism                             | N | N | N | N |
| 255 | PON1     | ENSG00000005421.4  | Other_Metabolism                             | N | N | N | N |
| 256 | PON2     | ENSG00000105854.7  | Other_Metabolism                             | N | N | N | N |
| 257 | PON3     | ENSG00000105852.6  | Other_Metabolism                             | N | N | N | N |
| 258 | POR      | ENSG00000127948.9  | Other_Metabolism                             | N | N | N | N |
| 259 | PPARA    | ENSG00000186951.11 | Nuclear<br>Receptor/Transcripti<br>on Factor | Y | N | N | N |
| 260 | PPARD    | ENSG00000112033.9  | Nuclear<br>Receptor/Transcripti<br>on Factor | Y | N | N | N |
| 261 | PPARG    | ENSG00000132170.15 | Nuclear<br>Receptor/Transcripti<br>on Factor | Y | N | N | N |
| 262 | PPARGC1A | ENSG00000109819.4  | Nuclear<br>Receptor/Transcripti<br>on Factor | N | N | N | N |
| 263 | PPP1R9A  | ENSG00000158528.7  | Other                                        | N | N | N | N |
| 264 | PRSS53   | ENSG00000151006.7  | Other                                        | N | N | N | N |
| 265 | PSMB8    | ENSG00000204264.4  | Other                                        | N | N | N | N |
| 266 | PTGIS    | ENSG00000124212.3  | Other_Metabolism                             | Y | N | Y | N |
| 267 | PTGS1    | ENSG00000095303.10 | Other_Metabolism                             | Y | N | Y | N |
| 268 | PTGS2    | ENSG00000073756.7  | Other_Metabolism                             | Y | N | Y | N |
| 269 | QPRT     | ENSG00000103485.12 | Other_Metabolism                             | Y | N | Y | N |
| 270 | RALBP1   | ENSG00000017797.6  | Other_Transporter                            | N | N | N | N |
| 271 | RPL13    | ENSG00000167526.9  | Other                                        | N | N | N | N |
| 272 | RXRA     | ENSG00000186350.8  | Nuclear<br>Receptor/Transcripti<br>on Factor | Y | N | N | N |

|     |            |                    |                 |   |   |   |   |
|-----|------------|--------------------|-----------------|---|---|---|---|
| 273 | RYR1       | ENSG00000196218.5  | Channel         | Y | N | N | Y |
| 274 | RYR2       | ENSG00000198626.9  | Channel         | N | N | N | N |
| 275 | SCN1B      | ENSG00000105711.5  | Channel         | Y | N | N | Y |
| 276 | SCN2B      | ENSG00000149575.5  | Channel         | Y | N | N | Y |
| 277 | SCN3B      | ENSG00000166257.4  | Channel         | Y | N | N | Y |
| 278 | SCN4B      | ENSG00000177098.4  | Channel         | Y | N | N | Y |
| 279 | SCN5A      | ENSG00000183873.10 | Channel         | Y | N | N | Y |
| 280 | SERPINA1   | ENSG00000197249.8  | Other           | N | N | N | N |
| 281 | SERPINA7   | ENSG00000123561.10 | Other           | N | N | N | N |
| 282 | SLC10A1    | ENSG00000100652.4  | SLC_Transporter | N | N | N | N |
| 283 | SLC10A2    | ENSG00000125255.5  | SLC_Transporter | N | N | N | N |
| 284 | SLC13A1    | ENSG00000081800.4  | SLC_Transporter | N | N | N | N |
| 285 | SLC13A2    | ENSG00000007216.9  | SLC_Transporter | N | N | N | N |
| 286 | SLC13A3    | ENSG00000158296.9  | SLC_Transporter | N | N | N | N |
| 287 | SLC15A1    | ENSG00000088386.9  | SLC_Transporter | N | N | N | N |
| 288 | SLC15A2    | ENSG00000163406.5  | SLC_Transporter | N | N | N | N |
| 289 | SLC16A1    | ENSG00000155380.7  | SLC_Transporter | N | N | N | N |
| 290 | SLC19A1    | ENSG00000173638.13 | SLC_Transporter | N | N | N | N |
| 291 | SLC22A1    | ENSG00000175003.8  | SLC_Transporter | N | N | N | N |
| 292 | SLC22A10   | ENSG00000184999.7  | SLC_Transporter | N | N | N | N |
| 293 | SLC22A11   | ENSG00000168065.11 | SLC_Transporter | Y | N | N | N |
| 294 | SLC22A12   | ENSG00000197891.7  | SLC_Transporter | Y | N | N | N |
| 295 | SLC22A13   | ENSG00000172940.7  | SLC_Transporter | N | N | N | N |
| 296 | SLC22A14   | ENSG00000144671.5  | SLC_Transporter | N | N | N | N |
| 297 | SLC22A15   | ENSG00000163393.8  | SLC_Transporter | N | N | N | N |
| 298 | SLC22A16   | ENSG00000004809.9  | SLC_Transporter | N | N | N | N |
| 299 | SLC22A17   | ENSG00000092096.10 | SLC_Transporter | N | N | N | N |
| 300 | SLC22A18   | ENSG00000110628.9  | SLC_Transporter | N | N | N | N |
| 301 | SLC22A18AS | ENSG00000254827.1  | SLC_Transporter | N | N | N | N |
| 302 | SLC22A2    | ENSG00000112499.7  | SLC_Transporter | N | N | N | N |
| 303 | SLC22A3    | ENSG00000146477.4  | SLC_Transporter | N | N | N | N |
| 304 | SLC22A4    | ENSG00000197208.5  | SLC_Transporter | Y | N | N | N |
| 305 | SLC22A5    | ENSG00000197375.7  | SLC_Transporter | Y | N | N | N |
| 306 | SLC22A6    | ENSG00000197901.6  | SLC_Transporter | N | N | N | N |
| 307 | SLC22A7    | ENSG00000137204.10 | SLC_Transporter | N | N | N | N |
| 308 | SLC22A8    | ENSG00000149452.10 | SLC_Transporter | Y | N | N | N |
| 309 | SLC22A9    | ENSG00000149742.5  | SLC_Transporter | N | N | N | N |
| 310 | SLC25A27   | ENSG00000153291.8  | SLC_Transporter | N | N | N | N |
| 311 | SLC27A1    | ENSG00000130304.10 | SLC_Transporter | N | N | N | N |
| 312 | SLC28A1    | ENSG00000156222.7  | SLC_Transporter | N | N | N | N |
| 313 | SLC28A2    | ENSG00000137860.7  | SLC_Transporter | N | N | N | N |
| 314 | SLC28A3    | ENSG00000197506.6  | SLC_Transporter | N | N | N | N |
| 315 | SLC29A1    | ENSG00000112759.11 | SLC_Transporter | N | N | N | N |

|     |         |                    |                   |   |   |   |   |
|-----|---------|--------------------|-------------------|---|---|---|---|
| 316 | SLC29A2 | ENSG00000174669.7  | SLC_Transporter   | N | N | N | N |
| 317 | SLC2A4  | ENSG00000181856.10 | SLC_Transporter   | Y | N | N | N |
| 318 | SLC2A5  | ENSG00000142583.11 | SLC_Transporter   | Y | N | N | N |
| 319 | SLC47A1 | ENSG00000142494.7  | SLC_Transporter   | N | N | N | N |
| 320 | SLC5A6  | ENSG00000138074.9  | SLC_Transporter   | N | N | N | N |
| 321 | SLC6A3  | ENSG00000142319.14 | SLC_Transporter   | Y | N | N | N |
| 322 | SLC6A4  | ENSG00000108576.4  | SLC_Transporter   | Y | N | N | N |
| 323 | SLC6A6  | ENSG00000131389.12 | SLC_Transporter   | N | N | N | N |
| 324 | SLC7A5  | ENSG00000103257.4  | SLC_Transporter   | N | N | N | N |
| 325 | SLC7A7  | ENSG00000155465.13 | SLC_Transporter   | N | N | N | N |
| 326 | SLC7A8  | ENSG00000092068.13 | SLC_Transporter   | N | N | N | N |
| 327 | SLCO1A2 | ENSG00000084453.12 | SLC_Transporter   | N | N | N | N |
| 328 | SLCO1B1 | ENSG00000134538.2  | SLC_Transporter   | N | N | N | N |
| 329 | SLCO1B3 | ENSG00000111700.8  | SLC_Transporter   | N | N | N | N |
| 330 | SLCO1C1 | ENSG00000139155.4  | SLC_Transporter   | N | N | N | N |
| 331 | SLCO2A1 | ENSG00000174640.8  | SLC_Transporter   | N | N | N | N |
| 332 | SLCO2B1 | ENSG00000137491.9  | SLC_Transporter   | N | N | N | N |
| 333 | SLCO3A1 | ENSG00000176463.8  | SLC_Transporter   | N | N | N | N |
| 334 | SLCO4A1 | ENSG00000101187.10 | SLC_Transporter   | N | N | N | N |
| 335 | SLCO4C1 | ENSG00000173930.8  | SLC_Transporter   | N | N | N | N |
| 336 | SLCO5A1 | ENSG00000137571.5  | SLC_Transporter   | N | N | N | N |
| 337 | SLCO6A1 | ENSG00000205359.5  | SLC_Transporter   | N | N | N | N |
| 338 | SOD2    | ENSG00000112096.11 | Other_Metabolism  | N | N | N | N |
| 339 | SPG7    | ENSG00000197912.8  | Other             | N | N | N | N |
| 340 | SPN     | ENSG00000197471.6  | Other             | N | N | N | N |
| 341 | SPP1    | ENSG00000118785.8  | Other             | N | N | N | N |
| 342 | SULT1A1 | ENSG00000196502.7  | SULT_Metabolism   | N | N | N | N |
| 343 | SULT1A2 | ENSG00000197165.6  | SULT_Metabolism   | N | N | N | N |
| 344 | SULT1A3 | ENSG00000261052.1  | SULT_Metabolism   | N | N | N | N |
| 345 | SULT1B1 | ENSG00000173597.3  | SULT_Metabolism   | N | N | N | N |
| 346 | SULT1C2 | ENSG00000198203.5  | SULT_Metabolism   | N | N | N | N |
| 347 | SULT1C4 | ENSG00000198075.5  | SULT_Metabolism   | N | N | N | N |
| 348 | SULT1E1 | ENSG00000109193.6  | SULT_Metabolism   | N | N | N | N |
| 349 | SULT2A1 | ENSG00000105398.3  | SULT_Metabolism   | N | N | N | N |
| 350 | SULT2B1 | ENSG00000088002.6  | SULT_Metabolism   | N | N | N | N |
| 351 | SULT4A1 | ENSG00000130540.9  | SULT_Metabolism   | N | N | N | N |
| 352 | TAP1    | ENSG00000168394.9  | Other_Transporter | N | N | N | N |
| 353 | TBXAS1  | ENSG00000059377.10 | Other_Metabolism  | Y | N | Y | N |
| 354 | TCL1A   | ENSG00000100721.6  | Other             | N | N | N | N |
| 355 | TGFB1   | ENSG00000105329.4  | Other             | N | N | N | N |
| 356 | TGFB2   | ENSG00000092969.7  | Other             | Y | N | N | N |
| 357 | TGFB3   | ENSG00000119699.3  | Other             | N | N | N | N |
| 358 | TGFBI   | ENSG00000120708.9  | Other             | N | N | N | N |

|     |          |                    |                                              |   |   |   |   |
|-----|----------|--------------------|----------------------------------------------|---|---|---|---|
| 359 | TNF      | ENSG00000232810.3  | Other                                        | Y | N | N | N |
| 360 | TNFRSF1A | ENSG00000067182.3  | Other                                        | Y | N | N | N |
| 361 | TNFRSF1B | ENSG00000028137.11 | Other                                        | Y | N | N | N |
| 362 | TPH1     | ENSG00000129167.5  | Other_Metabolism                             | Y | N | Y | N |
| 363 | TPH2     | ENSG00000139287.7  | Other_Metabolism                             | N | N | N | N |
| 364 | TPMT     | ENSG00000137364.4  | Other_Metabolism                             | N | N | N | N |
| 365 | TPSG1    | ENSG00000116176.6  | Other                                        | N | N | N | N |
| 366 | TYMS     | ENSG00000176890.10 | Other_Metabolism                             | Y | N | Y | N |
| 367 | UGT1A1   | ENSG00000241635.2  | UGT_Metabolism                               | N | N | N | N |
| 368 | UGT1A10  | ENSG00000242515.1  | UGT_Metabolism                               | N | N | N | N |
| 369 | UGT1A3   | ENSG00000243135.1  | UGT_Metabolism                               | N | N | N | N |
| 370 | UGT1A4   | ENSG00000244474.1  | UGT_Metabolism                               | N | N | N | N |
| 371 | UGT1A5   | ENSG00000240224.1  | UGT_Metabolism                               | N | N | N | N |
| 372 | UGT1A6   | ENSG00000167165.11 | UGT_Metabolism                               | N | N | N | N |
| 373 | UGT1A7   | ENSG00000244122.2  | UGT_Metabolism                               | N | N | N | N |
| 374 | UGT1A8   | ENSG00000242366.1  | UGT_Metabolism                               | N | N | N | N |
| 375 | UGT1A9   | ENSG00000241119.1  | UGT_Metabolism                               | N | N | N | N |
| 376 | UGT2A1   | ENSG00000173610.6  | UGT_Metabolism                               | N | N | N | N |
| 377 | UGT2B10  | ENSG00000109181.7  | UGT_Metabolism                               | N | N | N | N |
| 378 | UGT2B11  | ENSG00000213759.4  | UGT_Metabolism                               | N | N | N | N |
| 379 | UGT2B15  | ENSG00000196620.4  | UGT_Metabolism                               | N | N | N | N |
| 380 | UGT2B17  | ENSG00000197888.2  | UGT_Metabolism                               | N | N | N | N |
| 381 | UGT2B28  | ENSG00000135226.12 | UGT_Metabolism                               | N | N | N | N |
| 382 | UGT2B4   | ENSG00000156096.8  | UGT_Metabolism                               | N | N | N | N |
| 383 | UGT2B7   | ENSG00000171234.9  | UGT_Metabolism                               | N | N | N | N |
| 384 | UGT8     | ENSG00000174607.6  | UGT_Metabolism                               | N | N | N | N |
| 385 | VDR      | ENSG00000111424.6  | Nuclear<br>Receptor/Transcripti<br>on Factor | Y | N | N | N |
| 386 | VKORC1   | ENSG00000167397.10 | Other                                        | Y | N | N | N |
| 387 | XDH      | ENSG00000158125.5  | Other_Metabolism                             | Y | N | Y | N |
| 388 | XRCC1    | ENSG00000073050.5  | Other<br>Nuclear                             | N | N | N | N |
| 389 | ZNF423   | ENSG00000102935.7  | Receptor/Transcripti<br>on Factor            | N | N | N | N |

**Supplemental Table S2.** The population demographic information of the human (i) liver tissues, (ii) kidney tissues, (iii) heart atrial tissues, (iv) adipose tissue and (v) lymphoblastoid cell lines

(i) Human liver tissues

| Number | Tissue | Age | Sex    | Race      | Tissue Source                                                                                                                                                                                                                                                                                       | Selected 18 samples for subsampling analysis | Number of Raw Reads | Number of Unique Mapped Reads |
|--------|--------|-----|--------|-----------|-----------------------------------------------------------------------------------------------------------------------------------------------------------------------------------------------------------------------------------------------------------------------------------------------------|----------------------------------------------|---------------------|-------------------------------|
| 1      | Liver  | 75  | Female | Caucasian |                                                                                                                                                                                                                                                                                                     | Y                                            | 74067026            | 34956769                      |
| 2      | Liver  | 72  | Male   | Caucasian |                                                                                                                                                                                                                                                                                                     | Y                                            | 84596342            | 45728515                      |
| 3      | Liver  | 68  | Female | Caucasian |                                                                                                                                                                                                                                                                                                     | N                                            | 104114760           | 17720652                      |
| 4      | Liver  | 62  | Male   | Caucasian |                                                                                                                                                                                                                                                                                                     | Y                                            | 68202500            | 35937587                      |
| 5      | Liver  | 53  | Male   | Caucasian |                                                                                                                                                                                                                                                                                                     | Y                                            | 80599340            | 44339114                      |
| 6      | Liver  | 28  | Male   | Caucasian | These samples were normal postmortem human liver that were obtained through the Liver Tissue Procurement and Distribution System (University of Pittsburgh, Pennsylvania). Ref: Schadt, EE et al. Mapping the genetic architecture of gene expression in human liver. PLoS Biol. 6(5), e107 (2008). | N                                            | 59695274            | 15933223                      |
| 7      | Liver  | 45  | Male   | Caucasian |                                                                                                                                                                                                                                                                                                     | Y                                            | 77870534            | 28870565                      |
| 8      | Liver  | 54  | Male   | Caucasian |                                                                                                                                                                                                                                                                                                     | Y                                            | 94573624            | 45599306                      |
| 9      | Liver  | 60  | Male   | Caucasian |                                                                                                                                                                                                                                                                                                     | N                                            | 63973708            | 14390113                      |
| 10     | Liver  | 60  | Male   | Caucasian |                                                                                                                                                                                                                                                                                                     | N                                            | 70802816            | 21585499                      |
| 11     | Liver  | 67  | Male   | Caucasian |                                                                                                                                                                                                                                                                                                     | Y                                            | 67874018            | 35489635                      |
| 12     | Liver  | 15  | Female | Caucasian |                                                                                                                                                                                                                                                                                                     | Y                                            | 73733946            | 38910060                      |
| 13     | Liver  | 66  | Female | Caucasian |                                                                                                                                                                                                                                                                                                     | Y                                            | 69714872            | 32125879                      |
| 14     | Liver  | 57  | Male   | Caucasian |                                                                                                                                                                                                                                                                                                     | Y                                            | 71821034            | 35512918                      |
| 15     | Liver  | 49  | Male   | Caucasian |                                                                                                                                                                                                                                                                                                     | Y                                            | 91979674            | 53216324                      |
| 16     | Liver  | 68  | Male   | Caucasian |                                                                                                                                                                                                                                                                                                     | Y                                            | 71825386            | 43402609                      |
| 17     | Liver  | 16  | Female | Caucasian |                                                                                                                                                                                                                                                                                                     | Y                                            | 62880672            | 26062674                      |
| 18     | Liver  | 75  | Female | Caucasian |                                                                                                                                                                                                                                                                                                     | N                                            | 51671476            | 9583751                       |
| 19     | Liver  | 30  | Female | Caucasian |                                                                                                                                                                                                                                                                                                     | N                                            | 93870408            | 45110798                      |
| 20     | Liver  | 47  | Female | Caucasian |                                                                                                                                                                                                                                                                                                     | Y                                            | 87331202            | 52582049                      |
| 21     | Liver  | 53  | Male   | Caucasian |                                                                                                                                                                                                                                                                                                     | Y                                            | 97121978            | 44788608                      |
| 22     | Liver  | 56  | Male   | Caucasian |                                                                                                                                                                                                                                                                                                     | Y                                            | 91811956            | 42282929                      |
| 23     | Liver  | 47  | Female | Caucasian |                                                                                                                                                                                                                                                                                                     | Y                                            | 110671808           | 51553038                      |
| 24     | Liver  | 70  | Male   | Caucasian |                                                                                                                                                                                                                                                                                                     | Y                                            | 84448060            | 44540884                      |

(ii) Human kidney tissues

| Number | Tissue        | Age | Sex    | Race      | Tissue Source | Selected 18 samples for subsampling analysis | Number of Raw Reads | Number of Unique Mapped Reads |
|--------|---------------|-----|--------|-----------|---------------|----------------------------------------------|---------------------|-------------------------------|
| 1      | Kidney Cortex | 56  | Female | Caucasian |               | Y                                            | 62779252            | 45253435                      |
| 3      | Kidney Cortex | 46  | Female | Caucasian |               | Y                                            | 58792770            | 46005702                      |
| 5      | Kidney Cortex | 69  | Female | Caucasian |               | N                                            | 59355760            | 22159488                      |
| 6      | Kidney Cortex | 55  | Male   | Caucasian |               | Y                                            | 55527738            | 38728138                      |
| 7      | Kidney Cortex | 55  | Male   | Caucasian |               | Y                                            | 53197840            | 26905312                      |
| 9      | Kidney Cortex | 52  | Male   | Caucasian |               | Y                                            | 64374362            | 26904786                      |

|    |               |    |        |           |                                                                                                                                                                                                                                                                                                  |   |          |          |
|----|---------------|----|--------|-----------|--------------------------------------------------------------------------------------------------------------------------------------------------------------------------------------------------------------------------------------------------------------------------------------------------|---|----------|----------|
| 10 | Kidney Cortex | 90 | Female | Caucasian |                                                                                                                                                                                                                                                                                                  | Y | 93557570 | 52642042 |
| 11 | Kidney Cortex | 38 | Female | Caucasian | The samples were normal                                                                                                                                                                                                                                                                          | Y | 89809126 | 64068201 |
| 13 | Kidney Cortex | 4  | Female | Caucasian | postmortom or biospy kidney                                                                                                                                                                                                                                                                      | Y | 52480948 | 43258580 |
| 17 | Kidney Cortex | 53 | Male   | Caucasian | samples (renal cortex) purchased from Asterand (Detroit, USA) or Captial Biosciences (Rockville, USA). Ref: Dahlin, A et al. Gene expression profiling of transporters in the solute carrere and ATP-binding cassette superfamilies in human eye substructures. Mol Pharm. 10(2), 650-63 (2013). | Y | 73674810 | 40695337 |
| 18 | Kidney Cortex | 8  | Male   | Caucasian |                                                                                                                                                                                                                                                                                                  | Y | 60115224 | 27734510 |
| 19 | Kidney Cortex | 45 | Male   | Caucasian |                                                                                                                                                                                                                                                                                                  | Y | 60233332 | 40856985 |
| 21 | Kidney Cortex | 4  | Female | Caucasian |                                                                                                                                                                                                                                                                                                  | Y | 52559678 | 35445455 |
| 24 | Kidney Cortex | 43 | Male   | Caucasian |                                                                                                                                                                                                                                                                                                  | Y | 64779326 | 38887558 |
| 25 | Kidney Cortex | 6  | Female | Caucasian |                                                                                                                                                                                                                                                                                                  | Y | 61298068 | 31392534 |
| 28 | Kidney Cortex | 52 | Female | Caucasian |                                                                                                                                                                                                                                                                                                  | Y | 72942822 | 37827074 |
| 29 | Kidney Cortex | 46 | Male   | Caucasian |                                                                                                                                                                                                                                                                                                  | Y | 54346380 | 35303709 |
| 30 | Kidney Cortex | 62 | Male   | Caucasian |                                                                                                                                                                                                                                                                                                  | Y | 48339104 | 29641115 |
| 31 | Kidney Cortex | 79 | Female | Caucasian |                                                                                                                                                                                                                                                                                                  | Y | 71638562 | 34751600 |
| 32 | Kidney Cortex | 68 | Male   | Caucasian |                                                                                                                                                                                                                                                                                                  | N | 45190234 | 19613545 |

(iii) Human heart ventricle tissues

| Number | Tissue          | Age | Sex | Race      | Tissue Source                                                                                                                                                                                                      | Selected 18 samples for subsampling analysis | Number of Raw Reads | Number of Unique Mapped Reads |
|--------|-----------------|-----|-----|-----------|--------------------------------------------------------------------------------------------------------------------------------------------------------------------------------------------------------------------|----------------------------------------------|---------------------|-------------------------------|
| 1      | Heart ventricle | 34  | M   | Caucasian |                                                                                                                                                                                                                    | Y                                            | 89986426            | 57496576                      |
| 2      | Heart ventricle | 27  | F   | Caucasian | National Disease Research Interchange (NDRI, Philadelphia, PA, USA) or National Institute of Child Health & Human Development Brain and Tissue Bank (NICHD, Baltimore, MD, USA). All Specimens were collected from | Y                                            | 84793502            | 55413159                      |
| 3      | Heart ventricle | 15  | F   | Caucasian |                                                                                                                                                                                                                    | N                                            | 70404508            | 41813523                      |
| 4      | Heart ventricle | 42  | F   | Caucasian |                                                                                                                                                                                                                    | Y                                            | 71134668            | 35079948                      |
| 5      | Heart ventricle | 54  | F   | Caucasian |                                                                                                                                                                                                                    | Y                                            | 86216410            | 54037908                      |
| 6      | Heart ventricle | 18  | M   | Caucasian |                                                                                                                                                                                                                    | N                                            | 171225890           | 97410738                      |
| 7      | Heart ventricle | 60  | M   | Caucasian |                                                                                                                                                                                                                    | Y                                            | 84675428            | 55369577                      |
| 8      | Heart ventricle | 56  | M   | Caucasian |                                                                                                                                                                                                                    | N                                            | 83193276            | 49752663                      |
| 9      | Heart ventricle | 41  | M   | Caucasian |                                                                                                                                                                                                                    | Y                                            | 73803614            | 45942077                      |
| 10     | Heart ventricle | 57  | F   | Caucasian |                                                                                                                                                                                                                    | Y                                            | 96611370            | 58603837                      |
| 11     | Heart ventricle | 20  | M   | Caucasian |                                                                                                                                                                                                                    | Y                                            | 67776840            | 40658757                      |
| 12     | Heart ventricle | 39  | F   | Caucasian |                                                                                                                                                                                                                    | Y                                            | 89552672            | 48026027                      |
| 13     | Heart ventricle | 50  | M   | Caucasian |                                                                                                                                                                                                                    | Y                                            | 67834636            | 40110806                      |
| 14     | Heart ventricle | 48  | F   | Caucasian |                                                                                                                                                                                                                    | Y                                            | 80153734            | 44163960                      |
| 15     | Heart ventricle | 52  | M   | Caucasian |                                                                                                                                                                                                                    | Y                                            | 152250688           | 78898295                      |

|    |                 |    |   |           |  |   |          |          |
|----|-----------------|----|---|-----------|--|---|----------|----------|
| 16 | Heart ventricle | 38 | M | Caucasian |  | Y | 69862644 | 35314685 |
| 17 | Heart ventricle | 21 | M | Caucasian |  | Y | 70506838 | 42647395 |
| 18 | Heart ventricle | 40 | F | Caucasian |  | N | 83527236 | 54878424 |
| 19 | Heart ventricle | 63 | F | Caucasian |  | N | 77684194 | 49045169 |
| 20 | Heart ventricle | 54 | M | Caucasian |  | Y | 81806578 | 49297686 |
| 21 | Heart ventricle | 58 | M | Caucasian |  | Y | 82028022 | 52460405 |
| 22 | Heart ventricle | 41 | M | Caucasian |  | Y | 86796980 | 56908512 |
| 23 | Heart ventricle | 32 | F | Caucasian |  | Y | 75019736 | 50086176 |
| 24 | Heart ventricle | 25 | F | Caucasian |  | N | 71450592 | 49037737 |
| 25 | Heart ventricle | 19 | M | Caucasian |  | N | 74759838 | 49510692 |

(iv) Human adipose tissues

| Number | Tissue  | Age | Sex    | Race             | Tissue Source                                                                                                                                                                                                                                                                                                                                   | Selected 18 samples for subsampling analysis | Number of Raw Reads | Number of Unique Mapped Reads |
|--------|---------|-----|--------|------------------|-------------------------------------------------------------------------------------------------------------------------------------------------------------------------------------------------------------------------------------------------------------------------------------------------------------------------------------------------|----------------------------------------------|---------------------|-------------------------------|
| 1      | Adipose | 55  | Female | White            |                                                                                                                                                                                                                                                                                                                                                 | Y                                            | 85736534            | 59519669                      |
| 2      | Adipose | 36  | Female | White            | These adipose tissue biopsy specimens were collected from                                                                                                                                                                                                                                                                                       | Y                                            | 83640366            | 59602281                      |
| 3      | Adipose | 47  | Male   | African American | human                                                                                                                                                                                                                                                                                                                                           | N                                            | 49447548            | 34783714                      |
| 4      | Adipose | 31  | Female | African American | participants in a dietary intervention                                                                                                                                                                                                                                                                                                          | N                                            | 73916270            | 54369960                      |
| 5      | Adipose | 34  | Female | Asian            | clinical trial during the control diet (55% carbohydrate, 30% fat).                                                                                                                                                                                                                                                                             | N                                            | 88304362            | 63241541                      |
| 6      | Adipose | 56  | Female | White            | Participants were ≥ 18 years old, non-smoking, and overweight to obese with BMI between 25 and 40 kg/m2 but otherwise healthy. Ref: Chiu, S et al. Diets high in protein or saturated fat do not affect insulin sensitivity or plasma concentrations of lipids and lipoproteins in overweight and obese adults. J Nutr. 144(11), 1753-9 (2014). | Y                                            | 93083806            | 64193681                      |
| 7      | Adipose | 56  | Female | White            |                                                                                                                                                                                                                                                                                                                                                 | Y                                            | 82543362            | 55664950                      |
| 8      | Adipose | 23  | Female | African American |                                                                                                                                                                                                                                                                                                                                                 | N                                            | 53586144            | 39623296                      |
| 9      | Adipose | 42  | Female | unknown          |                                                                                                                                                                                                                                                                                                                                                 | Y                                            | 61709462            | 45082859                      |
| 10     | Adipose | 23  | Female | unknown          |                                                                                                                                                                                                                                                                                                                                                 | Y                                            | 67271848            | 46964491                      |
| 11     | Adipose | 57  | Female | White            |                                                                                                                                                                                                                                                                                                                                                 | Y                                            | 66104928            | 43979935                      |
| 12     | Adipose | 25  | Female | White            |                                                                                                                                                                                                                                                                                                                                                 | Y                                            | 49547238            | 34909751                      |
| 13     | Adipose | 45  | Female | White            |                                                                                                                                                                                                                                                                                                                                                 | Y                                            | 50875584            | 37640312                      |
| 14     | Adipose | 41  | Female | White            |                                                                                                                                                                                                                                                                                                                                                 | Y                                            | 60135280            | 40939107                      |
| 15     | Adipose | 41  | Male   | White            |                                                                                                                                                                                                                                                                                                                                                 | Y                                            | 65089562            | 46673558                      |
| 16     | Adipose | 35  | Male   | African American |                                                                                                                                                                                                                                                                                                                                                 | N                                            | 67916144            | 46874501                      |
| 17     | Adipose | 24  | Female | Asian            |                                                                                                                                                                                                                                                                                                                                                 | N                                            | 50115470            | 36854289                      |
| 18     | Adipose | 28  | Female | White            |                                                                                                                                                                                                                                                                                                                                                 | Y                                            | 61975066            | 44723046                      |
| 19     | Adipose | 52  | Male   | White            |                                                                                                                                                                                                                                                                                                                                                 | Y                                            | 80692410            | 56394164                      |
| 20     | Adipose | 59  | Female | unknown          |                                                                                                                                                                                                                                                                                                                                                 | Y                                            | 70007138            | 46842617                      |
| 21     | Adipose | 52  | Female | unknown          |                                                                                                                                                                                                                                                                                                                                                 | Y                                            | 62487308            | 42074173                      |
| 22     | Adipose | 29  | Female | White            |                                                                                                                                                                                                                                                                                                                                                 | Y                                            | 102082378           | 67896823                      |
| 23     | Adipose | 43  | Male   | White            |                                                                                                                                                                                                                                                                                                                                                 | Y                                            | 58759486            | 46246447                      |
| 24     | Adipose | 30  | Female | unknown          |                                                                                                                                                                                                                                                                                                                                                 | Y                                            | 55097874            | 42835016                      |
| 25     | Adipose | 36  | Female | Asian            |                                                                                                                                                                                                                                                                                                                                                 | N                                            | 54637216            | 42445588                      |



## (v) Lymphoblastoid cell lines

| Number | Tissue                              | Age   | Sex    | Race      | Source                                                                                                                          | Selected 18 samples for subsampling analysis | Number of Raw Reads | Number of Unique Mapped Reads |
|--------|-------------------------------------|-------|--------|-----------|---------------------------------------------------------------------------------------------------------------------------------|----------------------------------------------|---------------------|-------------------------------|
| 1      | Cells - EBV transformed lymphocytes | 32.78 | Male   | Caucasian |                                                                                                                                 | Y                                            | 69972926            | 46443636                      |
| 2      | Cells - EBV transformed lymphocytes | 39.79 | Male   | Caucasian | Immortalized lymphoblastoid cell lines (LCLs) were derived from blood samples isolated from participants of the Cholesterol and | Y                                            | 75594480            | 53463208                      |
| 3      | Cells - EBV transformed lymphocytes | 36.61 | Female | Caucasian | Pharmacogenetics (CAP) clinical trial, and grown at 37°C with 5% CO2 in RPMI                                                    | N                                            | 74795574            | 52297675                      |
| 4      | Cells - EBV transformed lymphocytes | 60.16 | Female | Caucasian | 1640 media supplemented with 10% FBS, 500 U/ml penicillin/streptomycin, and 2                                                   | N                                            | 85471302            | 48592209                      |
| 5      | Cells - EBV transformed lymphocytes | 49.17 | Male   | Caucasian | nmol/L GlutaMAX (Life Technologies). Ref: Simon, JA. Phenotypic predictors of response to simvastatin therapy among African-    | Y                                            | 92783426            | 64415559                      |
| 6      | Cells - EBV transformed lymphocytes | 75.38 | Female | Caucasian | Americans and Caucasians: the Cholesterol and Pharmacogenetics (CAP) Study. 97(6), 843-50 (2006).                               | N                                            | 58268928            | 43472851                      |
| 7      | Cells - EBV transformed lymphocytes | 68.27 | Male   | Caucasian |                                                                                                                                 | N                                            | 55648310            | 36045052                      |
| 8      | Cells - EBV transformed lymphocytes | 55.52 | Female | Caucasian |                                                                                                                                 | Y                                            | 68522488            | 51089785                      |
| 9      | Cells - EBV transformed lymphocytes | 48.39 | Female | Caucasian |                                                                                                                                 | N                                            | 58630148            | 38834141                      |

|    |                                              |       |        |           |   |           |          |
|----|----------------------------------------------|-------|--------|-----------|---|-----------|----------|
| 10 | Cells -<br>EBV<br>transformed<br>lymphocytes | 48.11 | Male   | Caucasian | Y | 84444016  | 56091455 |
| 11 | Cells -<br>EBV<br>transformed<br>lymphocytes | 54.97 | Male   | Caucasian | N | 61357514  | 43939195 |
| 12 | Cells -<br>EBV<br>transformed<br>lymphocytes | 30.14 | Male   | Caucasian | Y | 101160604 | 71356057 |
| 13 | Cells -<br>EBV<br>transformed<br>lymphocytes | 57.2  | Female | Caucasian | Y | 115794752 | 74586887 |
| 14 | Cells -<br>EBV<br>transformed<br>lymphocytes | 58.95 | Female | Caucasian | N | 72885284  | 47346008 |
| 15 | Cells -<br>EBV<br>transformed<br>lymphocytes | 35.15 | Male   | Caucasian | Y | 152314160 | 96570426 |
| 16 | Cells -<br>EBV<br>transformed<br>lymphocytes | 47.5  | Female | Caucasian | N | 82053168  | 53286669 |
| 17 | Cells -<br>EBV<br>transformed<br>lymphocytes | 43.72 | Male   | Caucasian | N | 109555426 | 72306303 |
| 18 | Cells -<br>EBV<br>transformed<br>lymphocytes | 47.9  | Male   | Caucasian | N | 85930840  | 56313704 |
| 19 | Cells -<br>EBV<br>transformed<br>lymphocytes | 61.61 | Male   | Caucasian | N | 51594666  | 39295502 |

|    |                                              |       |        |           |   |           |          |
|----|----------------------------------------------|-------|--------|-----------|---|-----------|----------|
| 20 | Cells -<br>EBV<br>transformed<br>lymphocytes | 39.38 | Female | Caucasian | Y | 76508342  | 49645812 |
| 21 | Cells -<br>EBV<br>transformed<br>lymphocytes | 55.3  | Male   | Caucasian | Y | 60053104  | 44091975 |
| 22 | Cells -<br>EBV<br>transformed<br>lymphocytes | 34.79 | Female | Caucasian | N | 66652646  | 45631941 |
| 23 | Cells -<br>EBV<br>transformed<br>lymphocytes | 55.34 | Male   | Caucasian | Y | 74609996  | 53514458 |
| 24 | Cells -<br>EBV<br>transformed<br>lymphocytes | 56.59 | Female | Caucasian | N | 102911154 | 75177432 |
| 25 | Cells -<br>EBV<br>transformed<br>lymphocytes | 55.14 | Male   | Caucasian | N | 65205334  | 49505425 |
| 26 | Cells -<br>EBV<br>transformed<br>lymphocytes | 54.86 | Female | Caucasian | N | 55295558  | 40638125 |
| 27 | Cells -<br>EBV<br>transformed<br>lymphocytes | 66.82 | Female | Caucasian | Y | 129585604 | 72749855 |
| 28 | Cells -<br>EBV<br>transformed<br>lymphocytes | 62.46 | Female | Caucasian | Y | 122101926 | 74173449 |
| 29 | Cells -<br>EBV<br>transformed<br>lymphocytes | 53.09 | Female | Caucasian | N | 87917948  | 61659547 |

|    |                                              |       |        |           |   |           |          |
|----|----------------------------------------------|-------|--------|-----------|---|-----------|----------|
| 30 | Cells -<br>EBV<br>transformed<br>lymphocytes | 61.57 | Male   | Caucasian | Y | 109350692 | 73321404 |
| 31 | Cells -<br>EBV<br>transformed<br>lymphocytes | 53.37 | Female | Caucasian | N |           | 65485414 |
| 32 | Cells -<br>EBV<br>transformed<br>lymphocytes | 59.04 | Male   | Caucasian | N |           | 53225501 |
| 33 | Cells -<br>EBV<br>transformed<br>lymphocytes | 37.86 | Male   | Caucasian | Y | 64469612  | 43366971 |
| 34 | Cells -<br>EBV<br>transformed<br>lymphocytes | 42.07 | Male   | Caucasian | Y | 62572380  | 45370734 |
| 35 | Cells -<br>EBV<br>transformed<br>lymphocytes | 50.87 | Male   | Caucasian | N | 69861558  | 48770638 |
| 36 | Cells -<br>EBV<br>transformed<br>lymphocytes | 53.45 | Female | Caucasian | N | 60815498  | 45235275 |
| 37 | Cells -<br>EBV<br>transformed<br>lymphocytes | 68.18 | Male   | Caucasian | N |           | 56501103 |
| 38 | Cells -<br>EBV<br>transformed<br>lymphocytes | 66.82 | Female | Caucasian | N | 72643362  | 51300794 |
| 39 | Cells -<br>EBV<br>transformed<br>lymphocytes | 52.41 | Male   | Caucasian | N | 89283478  | 60251207 |

|    |                                              |       |        |           |   |          |          |
|----|----------------------------------------------|-------|--------|-----------|---|----------|----------|
| 40 | Cells -<br>EBV<br>transformed<br>lymphocytes | 39.83 | Female | Caucasian | N | 90255134 | 56119858 |
| 41 | Cells -<br>EBV<br>transformed<br>lymphocytes | 60.42 | Male   | Caucasian | N | 66256126 | 47099855 |
| 42 | Cells -<br>EBV<br>transformed<br>lymphocytes | 62.29 | Female | Caucasian | N | 72326344 | 48102041 |
| 43 | Cells -<br>EBV<br>transformed<br>lymphocytes | 54.01 | Male   | Caucasian | Y | 78219746 | 56276095 |
| 44 | Cells -<br>EBV<br>transformed<br>lymphocytes | 35.22 | Male   | Caucasian | Y | 86976208 | 60067824 |
| 45 | Cells -<br>EBV<br>transformed<br>lymphocytes | 44.24 | Male   | Caucasian | N | 84188582 | 54902701 |

**Supplemental Table S3.** Summary of gene expression for the tissues

| <b>(a) PHARMACOGENES</b>                         | <b>LCL</b> | <b>Liver</b> | <b>Kidney</b> | <b>Adipose</b> | <b>Heart</b> | <b>Intersection</b> | <b>Union</b> |
|--------------------------------------------------|------------|--------------|---------------|----------------|--------------|---------------------|--------------|
| <b>Total Number of Genes Mapped and Analyzed</b> | 389        | 387*         | 389           | 389            | 389          | 389                 | 389          |
| <b>Ubiquitous<sup>1</sup></b>                    | 116        | 225          | 167           | 190            | 166          | 87                  | 291          |
| <b>Total Expressed<sup>2</sup></b>               | 188        | 320          | 315           | 274            | 255          | 161                 | 364          |
| <b>Total Undetected<sup>3</sup></b>              | 17         | 3            | 5             | 1              | 5            | 0                   | 22           |
| <b>Number of Specific Genes<sup>3</sup></b>      | 3          | 39           | 14            | 3              | 9            | NA                  | NA           |
| <b>% Ubiquitous (Ubiquitous/Total)</b>           | 29.80%     | 58.10%       | 42.90%        | 48.80%         | 42.70%       | 22.40%              | 74.81%       |
| <b>% Ubiquitous (Ubiquitous/Total Expressed)</b> | 61.70%     | 70.30%       | 53.00%        | 69.30%         | 65.10%       | 54.00%              | 79.95%       |
| <b>% Specific (Specific/Total Expressed)</b>     | 2.10%      | 14.00%       | 5.30%         | 1.30%          | 4.00%        | NA                  | NA           |
|                                                  |            |              |               |                |              |                     |              |
| <b>(b) ALL PROTEIN CODING</b>                    | <b>LCL</b> | <b>Liver</b> | <b>Kidney</b> | <b>Adipose</b> | <b>Heart</b> | <b>Intersection</b> | <b>Union</b> |
| <b>Total Number of Genes Mapped and Analyzed</b> | 20025      | 20012*       | 20025         | 20025          | 20025        | 20025               | 20025        |
| <b>Ubiquitous<sup>1</sup></b>                    | 9685       | 10375        | 10838         | 11274          | 10574        | 7845                | 13509        |
| <b>Total Expressed<sup>2</sup></b>               | 12772      | 14247        | 15416         | 14251          | 11223        | 11223               | 16888        |
| <b>Total Undetected<sup>3</sup></b>              | 1643       | 1132         | 866           | 725            | 1242         | 388                 | 2183         |
| <b>Number of Specific Genes<sup>4</sup></b>      | 418        | 305          | 494           | 248            | 290          | NA                  | NA           |
| <b>% Ubiquitous (Ubiquitous/Total)</b>           | 48.40%     | 51.80%       | 54.10%        | 56.30%         | 52.80%       | 39.20%              | 67.46%       |
| <b>% Ubiquitous (Ubiquitous/Total Expressed)</b> | 75.80%     | 72.80%       | 70.30%        | 79.10%         | 94.20%       | 69.90%              | 79.99%       |
| <b>% Specific (Specific/Total Expressed)</b>     | 3.20%      | 2.10%        | 3.10%         | 1.70%          | 2.00%        | NA                  | NA           |

\* Fewer number of genes mapped and analyzed in liver samples. For example in the liver, two pharmacogenes, ALB (albumin) and SERPINA1 (serpin peptidase inhibitor, clade A) were not able to be accurately quantified due to their high expression, and so these genes were excluded from liver analysis.

<sup>1</sup> Genes that have FPKM values  $\geq 1$  in all 18 individuals of each tissues or LCL.

<sup>2</sup> Total Expressed genes refers to genes that have FPKM  $\geq 1$  in any 18 individuals of each tissues or LCL.

<sup>3</sup> Total undetected genes refers to genes that have FPKM = 0 in all 18 individuals of each tissues or LCL.

<sup>4</sup> Number of specific genes refers to genes that have FPKM values  $\geq 1$  in one tissue only and other tissues have FPKM values  $< 1$ . List of these genes in Supplementary Table 5.

**Supplemental Table S4: Top 10 most variable gene sets (Top 20 for LCLs) (among protein coding genes with median FPKM >1) by tissue type. Enrichment of variability in gene expression in gene sets was calculated using the Gene Set Enrichment Analysis tool (GSEA, Subramanian A. et al. *PNAS* 2005;102(43):15545h 15550.), with coefficient of variation of each gene in a particular tissue type used as gene ranking. Gene sets tested include all gene ontology biological process sets with 15 to 500 genes, and 'PGRN pharmacogenes'. Significance of enrichment was calculated by permuting gene rank associations 1000 times. Raw enrichment scores, normalized enrichment scores (normalized by mean of enrichment scores over permutations), nominal p value from permutation, and false discovery rate q value over all gene sets shown below.**

| <b>Heart</b>                                                |                         |                                    |                       |                                    |
|-------------------------------------------------------------|-------------------------|------------------------------------|-----------------------|------------------------------------|
| <b>Set Name</b>                                             | <b>Enrichment Score</b> | <b>Normalized Enrichment Score</b> | <b>Nominal Pvalue</b> | <b>False Discovery Rate Qvalue</b> |
| CELL_SURFACE_RECEPTOR_LINKED_SIGNAL_TRANSDUCTION_GO_0007166 | 0.24                    | 5.24                               | 0                     | 0                                  |
| RESPONSE_TO_EXTERNAL_STIMULUS                               | 0.33                    | 5.12                               | 0                     | 0                                  |
| G_PROTEIN_COUPLED_RECEPTOR_PROTEIN_SIGNALING_PATHWAY        | 0.36                    | 5.04                               | 0                     | 0                                  |
| IMMUNE_SYSTEM_PROCESS                                       | 0.29                    | 4.93                               | 0                     | 0                                  |
| IMMUNE_RESPONSE                                             | 0.36                    | 4.92                               | 0                     | 0                                  |
| DEFENSE_RESPONSE                                            | 0.36                    | 4.88                               | 0                     | 0                                  |
| CELL_CELL_SIGNALING                                         | 0.28                    | 4.40                               | 0                     | 0                                  |
| <b>PGRN PHARMACOGENES</b>                                   | <b>0.25</b>             | <b>4.19</b>                        | <b>0</b>              | <b>0</b>                           |
| RESPONSE_TO_WOUNDING                                        | 0.34                    | 4.17                               | 0                     | 0                                  |
| LOCOMOTORY_BEHAVIOR                                         | 0.52                    | 4.04                               | 0                     | 0                                  |
| <b>Kidney</b>                                               |                         |                                    |                       |                                    |
| <b>PGRN PHARMACOGENES</b>                                   | <b>0.35</b>             | <b>6.49</b>                        | <b>0</b>              | <b>0</b>                           |
| DEFENSE_RESPONSE                                            | 0.43                    | 5.87                               | 0                     | 0                                  |
| RESPONSE_TO_EXTERNAL_STIMULUS                               | 0.35                    | 5.44                               | 0                     | 0                                  |
| RESPONSE_TO_WOUNDING                                        | 0.42                    | 5.24                               | 0                     | 0                                  |
| IMMUNE_RESPONSE                                             | 0.37                    | 4.99                               | 0                     | 0                                  |
| IMMUNE_SYSTEM_PROCESS                                       | 0.30                    | 4.95                               | 0                     | 0                                  |
| INFLAMMATORY_RESPONSE                                       | 0.45                    | 4.72                               | 0                     | 0                                  |
| CELL_SURFACE_RECEPTOR_LINKED_SIGNAL_TRANSDUCTION_GO_0007166 | 0.21                    | 4.60                               | 0                     | 0                                  |
| G_PROTEIN_COUPLED_RECEPTOR_PROTEIN_SIGNALING_PATHWAY        | 0.31                    | 4.43                               | 0                     | 0                                  |
| SYSTEM_PROCESS                                              | 0.22                    | 4.21                               | 0                     | 0                                  |
| <b>Adipose Tissue</b>                                       |                         |                                    |                       |                                    |
| IMMUNE_SYSTEM_PROCESS                                       | 0.30                    | 5.54                               | 0                     | 0                                  |
| IMMUNE_RESPONSE                                             | 0.35                    | 5.37                               | 0                     | 0                                  |

|                                                             |             |             |          |                 |
|-------------------------------------------------------------|-------------|-------------|----------|-----------------|
| DEFENSE_RESPONSE                                            | 0.37        | 5.14        | 0        | 0               |
| BEHAVIOR                                                    | 0.45        | 4.84        | 0        | 0               |
| G_PROTEIN_COUPLED_RECEPTOR_PROTEIN_SIGNALING_PATHWAY        | 0.32        | 4.50        | 0        | 0               |
| RESPONSE_TO_EXTERNAL_STIMULUS                               | 0.28        | 4.44        | 0        | 0               |
| LOCOMOTORY_BEHAVIOR                                         | 0.49        | 4.38        | 0        | 0               |
| <b>PGRN PHARMACOGENES</b>                                   | <b>0.25</b> | <b>4.14</b> | <b>0</b> | <b>0</b>        |
| CELL_SURFACE_RECEPTOR_LINKED_SIGNAL_TRANSDUCTION_GO_0007166 | 0.19        | 4.13        | 0        | 0               |
| CELLULAR_DEFENSE_RESPONSE                                   | 0.61        | 4.01        | 0        | 0               |
| <b>Liver</b>                                                |             |             |          |                 |
| <b>PGRN PHARMACOGENES</b>                                   | <b>0.27</b> | <b>4.94</b> | <b>0</b> | <b>0</b>        |
| CELL_CELL_SIGNALING                                         | 0.28        | 4.14        | 0        | 0               |
| IMMUNE_RESPONSE                                             | 0.27        | 3.91        | 0        | 0               |
| CELL_SURFACE_RECEPTOR_LINKED_SIGNAL_TRANSDUCTION_GO_0007166 | 0.18        | 3.82        | 0        | 0               |
| IMMUNE_SYSTEM_PROCESS                                       | 0.22        | 3.77        | 0        | 0               |
| DEFENSE_RESPONSE                                            | 0.23        | 3.35        | 0        | 0               |
| DIGESTION                                                   | 0.64        | 3.34        | 0        | 0               |
| G_PROTEIN_COUPLED_RECEPTOR_PROTEIN_SIGNALING_PATHWAY        | 0.26        | 3.33        | 0        | 0               |
| SYSTEM_DEVELOPMENT                                          | 0.13        | 3.23        | 0        | 0               |
| SYSTEM_PROCESS                                              | 0.18        | 3.17        | 0        | 0               |
| <b>LCLs</b>                                                 |             |             |          |                 |
| G_PROTEIN_COUPLED_RECEPTOR_PROTEIN_SIGNALING_PATHWAY        | 0.45        | 5.11        | 0        | 0               |
| CELL_SURFACE_RECEPTOR_LINKED_SIGNAL_TRANSDUCTION_GO_0007166 | 0.28        | 5.06        | 0        | 0               |
| RESPONSE_TO_EXTERNAL_STIMULUS                               | 0.29        | 3.89        | 0        | 0               |
| CELL_CELL_SIGNALING                                         | 0.31        | 3.87        | 0        | 0               |
| IMMUNE_RESPONSE                                             | 0.25        | 3.52        | 0        | 0               |
| MULTICELLULAR_ORGANISMAL_DEVELOPMENT                        | 0.14        | 3.51        | 0        | 0               |
| BEHAVIOR                                                    | 0.40        | 3.48        | 0        | 0               |
| RESPONSE_TO_WOUNDING                                        | 0.33        | 3.44        | 0        | 0               |
| SYSTEM_PROCESS                                              | 0.22        | 3.30        | 0        | 0               |
| DEFENSE_RESPONSE                                            | 0.26        | 3.29        | 0        | 0               |
| IMMUNE_SYSTEM_PROCESS                                       | 0.20        | 3.23        | 0        | 0               |
| ANATOMICAL_STRUCTURE_DEVELOPMENT                            | 0.14        | 3.20        | 0        | 0               |
| LOCOMOTORY_BEHAVIOR                                         | 0.42        | 3.09        | 0        | 0               |
| SYSTEM_DEVELOPMENT                                          | 0.14        | 2.98        | 0        | 6.49E-05        |
| INFLAMMATORY_RESPONSE                                       | 0.33        | 2.95        | 0        | 6.06E-05        |
| <b>PGRN PHARMACOGENES</b>                                   | <b>0.22</b> | <b>2.92</b> | <b>0</b> | <b>1.17E-04</b> |



**Supplemental Table S5A.** List of PGRN pharmacogenes that are expressed at higher levels in a single tissue or LCLs in the dataset. These genes are expressed with FPKM at least 10 times greater than the FPKM in all the other tissues. Tissue-specific gene expression values were calculated by summing FPKM values for all isoforms for a given gene in a given tissue (FPKM values per tissue were calculated by Cuffdiff, one per tissue using 18 samples for that tissue).

| <b>LCL</b> | <b>Liver</b> | <b>Kidney</b> | <b>Adipose</b> | <b>Heart</b> |
|------------|--------------|---------------|----------------|--------------|
| CHST11     | ABCB11       | ABP1          | PPARG          | CACNA1C      |
| SPN        | ABCB4        | CYP24A1       |                | CACNB2       |
| TCL1A      | ABCC2        | HSD11B2       |                | KCNH2        |
| TNF        | ABCG8        | SERPINA1      |                | NPPB         |
| TYMS       | AC008537.2   | SLC13A1       |                | RYR2         |
|            | ADH1A        | SLC13A2       |                | SCN2B        |
|            | ADH1C        | SLC22A11      |                | SCN5A        |
|            | ADH4         | SLC22A12      |                |              |
|            | AOX1         | SLC22A13      |                |              |
|            | APOA1        | SLC22A2       |                |              |
|            | APOA2        | SLC22A6       |                |              |
|            | APOA4        | SLC22A8       |                |              |
|            | APOB         | SLC6A3        |                |              |
|            | CHST13       | SPP1          |                |              |
|            | CYP1A2       | SULT1C2       |                |              |
|            | CYP21A2      | SULT2B1       |                |              |
|            | CYP26A1      | UGT8          |                |              |
|            | CYP2A13      |               |                |              |
|            | CYP2A6       |               |                |              |
|            | CYP2A7       |               |                |              |
|            | CYP2B6       |               |                |              |
|            | CYP2C18      |               |                |              |
|            | CYP2C19      |               |                |              |
|            | CYP2C8       |               |                |              |
|            | CYP2C9       |               |                |              |
|            | CYP2D6       |               |                |              |
|            | CYP2E1       |               |                |              |
|            | CYP3A4       |               |                |              |
|            | CYP3A43      |               |                |              |
|            | CYP3A5       |               |                |              |
|            | CYP3A7       |               |                |              |
|            | CYP4F11      |               |                |              |
|            | CYP4F3       |               |                |              |

CYP7A1  
CYP8B1  
DBH  
F2  
F5  
FOXA3  
MAT1A  
NAT2  
NNMT  
NR1I2  
NR1I3  
ORM1  
ORM2  
PON1  
PON3  
SERPINA7  
SLC10A1  
SLC22A1  
SLC22A10  
SLC22A9  
SLCO1B1  
SLCO1B3  
SULT1B1  
SULT1E1  
SULT2A1  
UGT1A1  
UGT1A3  
UGT1A4  
UGT2B10  
UGT2B15  
UGT2B4  
XDH

**Supplemental Table S5B.** List of PGRN pharmacogenes that are expressed at lower levels in only one tissue of the dataset. These genes are expressed with FPKM at least 10 times lower in one tissue relative to all other tissues or LCL analyzed in the dataset, and FPKM in other tissues greater than or equal to 1. Tissue-specific gene expression values were calculated by summing FPKM values for all isoforms for a given gene in a given tissue (FPKM values per tissue were calculated by Cuffdiff, one per tissue using 18 samples for that tissue).

| LCL      | Liver | Kidney | Adipose | Heart |
|----------|-------|--------|---------|-------|
| EPHX1    |       |        | CYP2J2  |       |
| COL1A1   |       |        |         |       |
| TGFB1    |       |        |         |       |
| APOE     |       |        |         |       |
| EGFR     |       |        |         |       |
| SULT1A1  |       |        |         |       |
| SLCO2A1  |       |        |         |       |
| CDA      |       |        |         |       |
| SLC22A17 |       |        |         |       |
| GSTM5    |       |        |         |       |
| ATP7B    |       |        |         |       |
| AOX1     |       |        |         |       |
| SPP1     |       |        |         |       |
| ADH1C    |       |        |         |       |
| NR3C2    |       |        |         |       |
| SLC2A4   |       |        |         |       |
| SCN1B    |       |        |         |       |
| ADRA1B   |       |        |         |       |
| ABCA1    |       |        |         |       |
| CYP4F12  |       |        |         |       |
| PEAR1    |       |        |         |       |
| FCGR3A   |       |        |         |       |
| SLC22A3  |       |        |         |       |
| SULT1C4  |       |        |         |       |
| SLC25A27 |       |        |         |       |
| ALDH1A1  |       |        |         |       |
| FMO3     |       |        |         |       |
| SLC7A8   |       |        |         |       |
| CYP39A1  |       |        |         |       |
| MAOA     |       |        |         |       |
| ORM1     |       |        |         |       |
| ADH1B    |       |        |         |       |
| AGTR1    |       |        |         |       |
| CES1     |       |        |         |       |
| PTGIS    |       |        |         |       |
| MAOB     |       |        |         |       |
| NNMT     |       |        |         |       |

**Supplemental Table S6.** A total of 20 pairwise comparisons were performed to detect the genes differentially expressed between LCLs and tissues for all protein coding genes (red) and pharmacogenes (blue). The **bold** numbers are the gene expression (FPKM) Spearman correlations between two tissues for tested genes. The numbers inside the parentheses refer to the number of genes differentially expressed between pairs of tissues (U: higher in row tissue/D: higher in column tissue). Genes are considered to be differentially expressed when  $q < 0.10$  in both DESeq and Cuffdiff and  $>2$  fold difference in expression. Darker shading indicates higher correlation.

| <b>Pharmacogenes</b> |                                |                                |                                |                                |                             |
|----------------------|--------------------------------|--------------------------------|--------------------------------|--------------------------------|-----------------------------|
|                      | <b>Liver</b>                   | <b>Kidney</b>                  | <b>Adipose</b>                 | <b>Heart</b>                   | <b>LCL</b>                  |
| <b>Liver</b>         |                                | <b>0.40</b><br>(U:119/D:69)    | <b>0.43</b><br>(U:134/D:48)    | <b>0.31</b><br>(U:141/D:58)    | <b>0.27</b><br>(U:173/D:38) |
| <b>Kidney</b>        | <b>0.87</b><br>(U:3540/D:3023) |                                | <b>0.64</b><br>(U:94/D:51)     | <b>0.61</b><br>(U:94/D:48)     | <b>0.51</b><br>(U:151/D:39) |
| <b>Adipose</b>       | <b>0.85</b><br>(U:3707/D:3862) | <b>0.87</b><br>(U:2940/D:3576) |                                | <b>0.83</b><br>(U:59/D:46)     | <b>0.62</b><br>(U:117/D:38) |
| <b>Heart</b>         | <b>0.82</b><br>(U:3828/D:3802) | <b>0.85</b><br>(U:2966/D:3335) | <b>0.9</b><br>(U:3118/D:3275)  |                                | <b>0.62</b><br>(U:115/D:39) |
| <b>LCL</b>           | <b>0.76</b><br>(U:5113/D:3713) | <b>0.76</b><br>(U:5198/D:4265) | <b>0.77</b><br>(U:5848/D:3781) | <b>0.75</b><br>(U:5360/D:3907) |                             |

**Protein-coding genes**

**Supplemental Table S7.** Percent of PGRN pharmacogenes that are alternatively spliced by class. Alternatively spliced genes have multiple mutually exclusive junctions each with at least 1 read/100bp and PSI>5 in at least one of the 90 samples. Genes reported as not alternatively spliced were not reported to have any evidence of mutually exclusive junctions in any sample, and have gene FPKM>10 in at least one sample. For other genes, it's unclear because the PSI may be below 5 or the gene may be low expressed and so some alternative splice events may not be observed.

| class          | #genes     | alt. spliced genes | not alt. spliced genes | unclear   | % alt. spliced | % not alt. spliced |
|----------------|------------|--------------------|------------------------|-----------|----------------|--------------------|
| Other_Transp   | 4          | 4                  | 0                      | 0         | 100.0%         | 0.0%               |
| ADH_Metabo     | 7          | 6                  | 0                      | 1         | 85.7%          | 0.0%               |
| Other_Metab    | 54         | 45                 | 5                      | 4         | 83.3%          | 9.3%               |
| ABC_Transpor   | 24         | 20                 | 1                      | 3         | 83.3%          | 4.2%               |
| UGT_Metabol    | 18         | 15                 | 1                      | 2         | 83.3%          | 5.6%               |
| SULT_Metabc    | 10         | 8                  | 0                      | 2         | 80.0%          | 0.0%               |
| SLC_Transpor   | 56         | 43                 | 5                      | 8         | 76.8%          | 8.9%               |
| Other          | 77         | 55                 | 9                      | 13        | 71.4%          | 11.7%              |
| ALDH_Metabol   | 7          | 5                  | 0                      | 2         | 71.4%          | 0.0%               |
| GST_Metabol    | 17         | 12                 | 1                      | 4         | 70.6%          | 5.9%               |
| Nuclear Recept | 24         | 16                 | 7                      | 1         | 66.7%          | 29.2%              |
| CYP_Metabol    | 47         | 30                 | 6                      | 11        | 63.8%          | 12.8%              |
| Receptor       | 29         | 13                 | 5                      | 11        | 44.8%          | 17.2%              |
| Channel        | 15         | 6                  | 5                      | 4         | 40.0%          | 33.3%              |
| <b>Total</b>   | <b>389</b> | <b>278</b>         | <b>45</b>              | <b>66</b> | <b>71.5%</b>   | <b>11.6%</b>       |

**Supplemental Table S8.** A total of 20 pairwise comparisons were performed to detect the genes differentially alternative spliced between LCLs and tissues for all protein coding genes (red) and pharmacogenes (blue). Reported are the number of genes (**bold**) with a significantly differentially spliced event (in parentheses is the percent of tested events that were significant). Significant splicing events were determined by a Wilcoxon test on the 'percent spliced in' (PSI) values between two tissues (Benjamini-Hochberg corrected p-value <0.05) and the difference in median PSI between the tissues had to be >5. To be tested, an event must have a coverage of at least 10 reads/100bp in at least half the samples for each of the two tissues. Darker shading indicates a smaller percentage of events are differentially spliced.

| <b>Pharmacogenes</b> |                      |                      |                      |                      |                    |
|----------------------|----------------------|----------------------|----------------------|----------------------|--------------------|
|                      | <b>Liver</b>         | <b>Kidney</b>        | <b>Adipose</b>       | <b>Heart</b>         | <b>LCL</b>         |
| <b>Liver</b>         |                      | <b>18</b><br>(6.3%)  | <b>14</b><br>(8.2%)  | <b>10</b><br>(8.8%)  | <b>14</b><br>(15%) |
| <b>Kidney</b>        | <b>590</b><br>(9.2%) |                      | <b>12</b><br>(10%)   | <b>8</b><br>(6.1%)   | <b>14</b><br>(16%) |
| <b>Adipose</b>       | <b>849</b><br>(14%)  | <b>826</b><br>(12%)  |                      | <b>12</b><br>(13%)   | <b>19</b><br>(23%) |
| <b>Heart</b>         | <b>787</b><br>(15%)  | <b>743</b><br>(12%)  | <b>1021</b><br>(16%) |                      | <b>16</b><br>(21%) |
| <b>LCL</b>           | <b>1246</b><br>(21%) | <b>1408</b><br>(19%) | <b>1538</b><br>(21%) | <b>1403</b><br>(21%) |                    |

**Protein-coding genes**

**Supplemental Table S9:** The number of alternative splicing events (A) or genes with alternative splicing events (B) with at least 1 read/100bp and PSI>5 in one tissue and no coverage in any of the other four tissues. The potentially alternatively spliced region must have read coverage of at least 20 reads/100bp in at least 5 samples of each of the other four tissues to control for gene expression differences between tissues.

**A** Number of splice events observed in only one tissue (# of events in regions with read coverage >20reads/10bbp in at least 5 samples of all four other tissues)

| Tissue  | Protein-Coding Genes | Pharmacogenes   |
|---------|----------------------|-----------------|
| Adipose | 20 (of 3718, 0.5%)   | 2 (of 52, 3.8%) |
| Heart   | 43 (of 3862, 1.1%)   | 1 (of 54, 1.9%) |
| Liver   | 20 (of 4061, 0.5%)   | 1 (of 53, 1.9%) |
| Kidney  | 24 (of 3582, 0.7%)   | 1 (of 48, 2.1%) |
| LCLs    | 63 (of 3874, 1.6%)   | 2 (of 75, 2.7%) |

**B** Number of genes with a splice event observed in only one tissue (# of genes with an event in a region with read coverage >20reads/10bbp in at least 5 samples of all four other tissues)

| Tissue  | Protein-Coding Genes | Pharmacogenes   |
|---------|----------------------|-----------------|
| Adipose | 22 (of 2152, 1.0%)   | 1 (of 21, 4.8%) |
| Heart   | 51 (of 2264, 2.3%)   | 0 (of 23, 0.0%) |
| Liver   | 22 (of 2285, 1.0%)   | 0 (of 21, 0.0%) |
| Kidney  | 29 (of 2083, 1.4%)   | 0 (of 19, 0.0%) |
| LCLs    | 89 (of 2269, 3.9%)   | 1 (of 31, 3.2%) |

**Supplemental Table S10.** Differences between tissues for QC metrics calculated by RNASeQC by Tukey HSD test. Difference in means between tissues and p-value for test shown below.

| Tissue Comparison | Intragenic.Rate |           | Exonic.Rate |          |
|-------------------|-----------------|-----------|-------------|----------|
|                   | Difference      | Pvalue    | Difference  | Pvalue   |
| Heart-Adipose     | 0.0069          | 2.40E-03  | -0.0279     | 1.79E-01 |
| Kidney-Adipose    | -0.0011         | -5.65E-03 | -0.0179     | 6.23E-01 |
| Kidney-Heart      | -0.0080         | -1.25E-02 | 0.0100      | 9.34E-01 |
| Liver-Adipose     | 0.0078          | 3.46E-03  | 0.0022      | 1.00E+00 |
| Liver-Heart       | 0.0009          | -3.42E-03 | 0.0301      | 1.06E-01 |
| Liver-Kidney      | 0.0089          | 4.53E-03  | 0.0201      | 4.85E-01 |
| LCL-Adipose       | 0.0262          | 2.22E-02  | 0.1577      | 0.00E+00 |
| LCL-Heart         | 0.0193          | 1.53E-02  | 0.1856      | 0.00E+00 |
| LCL-Kidney        | 0.0273          | 2.33E-02  | 0.1756      | 0.00E+00 |
| LCL-Liver         | -0.0183         | -2.22E-02 | -0.1555     | 0.00E+00 |

| Tissue Comparison | Intronic.Rate |          | Intergenic.Rate |          |
|-------------------|---------------|----------|-----------------|----------|
|                   | Difference    | Pvalue   | Difference      | Pvalue   |
| Heart-Adipose     | 0.0348        | 2.08E-02 | -0.0071         | 2.22E-04 |
| Kidney-Adipose    | 0.0168        | 5.83E-01 | 0.0011          | 9.65E-01 |
| Kidney-Heart      | -0.0180       | 5.15E-01 | 0.0082          | 1.70E-05 |
| Liver-Adipose     | 0.0056        | 9.86E-01 | -0.0078         | 2.63E-05 |
| Liver-Heart       | -0.0291       | 6.68E-02 | -0.0006         | 9.95E-01 |
| Liver-Kidney      | -0.0111       | 8.54E-01 | -0.0088         | 1.58E-06 |
| LCL-Adipose       | -0.1315       | 0.00E+00 | -0.0264         | 0.00E+00 |
| LCL-Heart         | -0.1663       | 0.00E+00 | -0.0193         | 0.00E+00 |
| LCL-Kidney        | -0.1483       | 0.00E+00 | -0.0275         | 0.00E+00 |
| LCL-Liver         | 0.1372        | 0.00E+00 | 0.0187          | 0.00E+00 |

| Tissue Comparison | Mean.Per.Base.Cov. |          | Expression.Profiling.Efficiency |          |
|-------------------|--------------------|----------|---------------------------------|----------|
|                   | Difference         | Pvalue   | Difference                      | Pvalue   |
| Heart-Adipose     | 0.1020             | 1.00E+00 | -0.0279                         | 1.79E-01 |
| Kidney-Adipose    | -11.5318           | 4.68E-03 | -0.0179                         | 6.23E-01 |
| Kidney-Heart      | -11.6338           | 4.21E-03 | 0.0100                          | 9.34E-01 |
| Liver-Adipose     | -15.1393           | 3.26E-05 | 0.0022                          | 1.00E+00 |
| Liver-Heart       | -15.2413           | 2.83E-05 | 0.0301                          | 1.06E-01 |
| Liver-Kidney      | -3.6074            | 7.84E-01 | 0.0201                          | 4.85E-01 |
| LCL-Adipose       | 31.4712            | 0.00E+00 | 0.1577                          | 0.00E+00 |
| LCL-Heart         | 31.3692            | 0.00E+00 | 0.1856                          | 0.00E+00 |
| LCL-Kidney        | 43.0030            | 0.00E+00 | 0.1756                          | 0.00E+00 |
| LCL-Liver         | -46.6105           | 0.00E+00 | -0.1555                         | 0.00E+00 |



| Tissue Comparison | Fragment.Length.StdDev |          | Fragment.Length.Mean |          |
|-------------------|------------------------|----------|----------------------|----------|
|                   | Difference             | Pvalue   | Difference           | Pvalue   |
| Heart-Adipose     | 4.4400                 | 6.13E-01 | 2.9600               | 9.29E-01 |
| Kidney-Adipose    | 0.5750                 | 1.00E+00 | -5.6683              | 5.47E-01 |
| Kidney-Heart      | -3.8650                | 7.35E-01 | -8.6283              | 1.44E-01 |
| Liver-Adipose     | 2.3786                 | 9.35E-01 | -5.5671              | 5.27E-01 |
| Liver-Heart       | -2.0614                | 9.60E-01 | -8.5271              | 1.25E-01 |
| Liver-Kidney      | 1.8036                 | 9.77E-01 | 0.1012               | 1.00E+00 |
| LCL-Adipose       | 79.3111                | 0.00E+00 | 51.6622              | 0.00E+00 |
| LCL-Heart         | 74.8711                | 0.00E+00 | 48.7022              | 0.00E+00 |
| LCL-Kidney        | 78.7361                | 0.00E+00 | 57.3306              | 0.00E+00 |
| LCL-Liver         | -76.9325               | 0.00E+00 | -57.2294             | 0.00E+00 |

| Tissue Comparison | rRNA.rate  |          | 5prime100baseNorm |          |
|-------------------|------------|----------|-------------------|----------|
|                   | Difference | Pvalue   | Difference        | Pvalue   |
| Heart-Adipose     | 0.0024     | 2.22E-03 | 0.0010            | 1.00E+00 |
| Kidney-Adipose    | 0.0036     | 9.57E-07 | -0.0327           | 8.99E-03 |
| Kidney-Heart      | 0.0012     | 3.25E-01 | -0.0337           | 6.44E-03 |
| Liver-Adipose     | 0.0012     | 3.36E-01 | -0.0510           | 2.44E-06 |
| Liver-Heart       | -0.0012    | 2.72E-01 | -0.0520           | 1.48E-06 |
| Liver-Kidney      | -0.0025    | 1.26E-03 | -0.0183           | 3.11E-01 |
| LCL-Adipose       | -0.0030    | 4.23E-06 | 0.0535            | 4.06E-08 |
| LCL-Heart         | -0.0054    | 0.00E+00 | 0.0525            | 7.32E-08 |
| LCL-Kidney        | -0.0066    | 0.00E+00 | 0.0862            | 0.00E+00 |
| LCL-Liver         | 0.0042     | 2.99E-11 | -0.1045           | 0.00E+00 |

| Tissue Comparison | End.1.Mismatch.Rate |          | End.2.Mismatch.Rate |          |
|-------------------|---------------------|----------|---------------------|----------|
|                   | Difference          | Pvalue   | Difference          | Pvalue   |
| Heart-Adipose     | -0.0005             | 8.54E-02 | -0.0008             | 6.51E-03 |
| Kidney-Adipose    | -0.0004             | 2.37E-01 | -0.0009             | 3.35E-04 |
| Kidney-Heart      | 0.0001              | 9.91E-01 | -0.0002             | 9.12E-01 |
| Liver-Adipose     | -0.0004             | 3.17E-01 | -0.0012             | 7.75E-07 |
| Liver-Heart       | 0.0001              | 9.53E-01 | -0.0005             | 2.17E-01 |
| Liver-Kidney      | 0.0000              | 9.99E-01 | -0.0003             | 7.42E-01 |
| LCL-Adipose       | 0.0003              | 4.87E-01 | 0.0004              | 2.66E-01 |
| LCL-Heart         | 0.0008              | 1.29E-04 | 0.0011              | 2.26E-07 |
| LCL-Kidney        | 0.0007              | 1.17E-03 | 0.0013              | 2.47E-09 |
| LCL-Liver         | -0.0007             | 1.58E-03 | -0.0016             | 1.25E-13 |

| Tissue Comparison | Base.Mismatch.Rate |          | End.1.Mapping.Rate |          |
|-------------------|--------------------|----------|--------------------|----------|
|                   | Difference         | Pvalue   | Difference         | Pvalue   |
| Heart-Adipose     | -0.0006            | 1.45E-02 | -0.0008            | 9.48E-01 |
| Kidney-Adipose    | -0.0007            | 7.36E-03 | 0.0007             | 9.70E-01 |
| Kidney-Heart      | 0.0000             | 9.99E-01 | 0.0014             | 6.56E-01 |
| Liver-Adipose     | -0.0008            | 6.42E-04 | -0.0027            | 6.84E-02 |

|              |         |          |         |          |
|--------------|---------|----------|---------|----------|
| Liver-Heart  | -0.0002 | 9.25E-01 | -0.0019 | 3.29E-01 |
| Liver-Kidney | -0.0001 | 9.81E-01 | -0.0033 | 1.19E-02 |
| LCL-Adipose  | 0.0003  | 3.06E-01 | 0.0035  | 1.83E-03 |
| LCL-Heart    | 0.0010  | 1.30E-06 | 0.0043  | 7.22E-05 |
| LCL-Kidney   | 0.0010  | 4.89E-07 | 0.0028  | 2.21E-02 |
| LCL-Liver    | -0.0011 | 4.70E-09 | -0.0062 | 1.04E-09 |

| End.2.Mapping.Rate |            |          |
|--------------------|------------|----------|
| Tissue Comparison  | Difference | Pvalue   |
| Heart-Adipose      | 0.0008     | 9.48E-01 |
| Kidney-Adipose     | -0.0007    | 9.70E-01 |
| Kidney-Heart       | -0.0014    | 6.56E-01 |
| Liver-Adipose      | 0.0027     | 6.84E-02 |
| Liver-Heart        | 0.0019     | 3.29E-01 |
| Liver-Kidney       | 0.0033     | 1.19E-02 |
| LCL-Adipose        | -0.0035    | 1.83E-03 |
| LCL-Heart          | -0.0043    | 7.22E-05 |
| LCL-Kidney         | -0.0028    | 2.21E-02 |
| LCL-Liver          | 0.0062     | 1.04E-09 |

Supplemental Table S11. Housekeeping genes show low variability in FPKM values. (A) Between individuals: values shown are standard deviation of log<sub>2</sub>(FPKM) values across individuals for each tissue. (B) Between tissues: values shown are the ratio of tissue-specific gene expression/geometric mean of expression across tissues. Housekeeping genes and definitions of variability from Eisenberg E, Levanon EY. Human housekeeping genes, revisited. Trends in genetics : TIG. 2013;29(10):569-74.

| A       | C15orf24 | C1orf43 | CHMP2A | GPI  | PSMB2 | PSMB4 | RAB7A | REEP5 | SNRPD3 | VCP  | VPS29 |
|---------|----------|---------|--------|------|-------|-------|-------|-------|--------|------|-------|
| Kidney  | 0.36     | 0.38    | 0.51   | 0.45 | 0.42  | 0.38  | 0.33  | 0.38  | 0.32   | 0.47 | 0.35  |
| Heart   | 0.32     | 0.40    | 0.42   | 0.29 | 0.22  | 0.28  | 0.37  | 0.28  | 0.49   | 0.49 | 0.27  |
| Adipose | 0.22     | 0.19    | 0.22   | 0.22 | 0.14  | 0.19  | 0.17  | 0.14  | 0.30   | 0.23 | 0.15  |
| Liver   | 0.23     | 0.35    | 0.35   | 0.45 | 0.27  | 0.34  | 0.32  | 0.21  | 0.28   | 0.49 | 0.19  |
| LCL     | 0.15     | 0.15    | 0.28   | 0.32 | 0.17  | 0.28  | 0.25  | 0.34  | 0.26   | 0.29 | 0.16  |

| B       | C15orf24 | C1orf43 | CHMP2A | GPI  | PSMB2 | PSMB4 | RAB7A | REEP5 | SNRPD3 | VCP  | VPS29 |
|---------|----------|---------|--------|------|-------|-------|-------|-------|--------|------|-------|
| Kidney  | 0.53     | 0.56    | 1.03   | 0.35 | 0.59  | 0.88  | 0.90  | 0.66  | 0.57   | 0.68 | 0.26  |
| Heart   | 0.79     | 1.07    | 0.85   | 1.17 | 0.58  | 0.66  | 0.97  | 1.24  | 0.79   | 1.14 | 0.82  |
| Adipose | 0.95     | 0.82    | 0.91   | 0.75 | 0.72  | 0.85  | 0.98  | 0.96  | 0.51   | 0.77 | 1.08  |
| Liver   | 1.38     | 1.34    | 1.08   | 0.83 | 1.46  | 1.11  | 0.86  | 1.10  | 1.21   | 1.02 | 0.94  |
| LCL     | 0.88     | 0.92    | 1.09   | 2.09 | 2.72  | 2.13  | 1.47  | 0.52  | 2.66   | 1.90 | 1.44  |

**Supplemental Table S12.** Reported are the number of pharmacogenes with a significantly differentially spliced event between tissues. Significant splicing events were determined by a Wilcoxon test on the 'percent spliced in' (PSI) values between two tissues (Benjamini-Hochberg corrected p-value <0.05) and the difference in median PSI between the tissues had to be >5. To be tested, an event must have a coverage of at least 10 reads/100bp in at least half the samples for each of the two tissues.

| <b>Tissue 1</b> | <b>Tissue 2</b> | <b>Significantly differentially spliced in PGRN data</b> | <b>Also with sufficient coverage to be tested in GTEx data</b> | <b>Also significantly differentially spliced in GTEx data</b> | <b>% of tested in GTEx, sig in GTEx</b> |
|-----------------|-----------------|----------------------------------------------------------|----------------------------------------------------------------|---------------------------------------------------------------|-----------------------------------------|
| Liver           | Heart           | 10                                                       | 6                                                              | 4                                                             | 67%                                     |
| Liver           | Kidney*         | 18                                                       | 14                                                             | 9                                                             | 64%                                     |
| Heart           | Adipose         | 12                                                       | 8                                                              | 4                                                             | 50%                                     |
| Liver           | Adipose         | 14                                                       | 9                                                              | 4                                                             | 44%                                     |
| Kidney*         | Heart           | 8                                                        | 5                                                              | 2                                                             | 40%                                     |
| Adipose         | LCLs            | 19                                                       | 8                                                              | 2                                                             | 25%                                     |
| Liver           | LCLs            | 14                                                       | 5                                                              | 1                                                             | 20%                                     |
| Kidney*         | LCLs            | 14                                                       | 5                                                              | 1                                                             | 20%                                     |
| Heart           | LCLs            | 16                                                       | 7                                                              | 1                                                             | 14%                                     |
| Kidney*         | Adipose         | 12                                                       | 8                                                              | 1                                                             | 13%                                     |
|                 |                 | <b>137</b>                                               | <b>75</b>                                                      | <b>29</b>                                                     | <b>39%</b>                              |

\*GTEx has only 8 kidney samples, so the power to find significant differential splicing is reduced

**Supplemental Table S13.** Splice events in PGRN pharmacogenes with PSI (percent spliced in)  $\geq 5$  and coverage  $\geq 1$  read/100bp in at least one sample of one tissue and no coverage in any of the four other tissues. The ones checked in the GTEx data and observed to also only be present in one tissue had  $\geq 1$  read/100bp in at least one sample of one tissue and no coverage in any of the four other tissues. For a number of events, matching the events between the PGRN and GTEx runs of JuncBASE was non-trivial, possibly due to lack of read coverage or increased splicing complexity in the GTEx data.

| Tissue  | Splice events observed in<br>only one tissue in PGRN<br>data | Checked in GTEx data | Also only observed in<br>one tissue in GTEx | % of checked in GTEx,<br>specific in GTEx |
|---------|--------------------------------------------------------------|----------------------|---------------------------------------------|-------------------------------------------|
|         | Liver                                                        | 179                  | 75                                          | 69                                        |
| Kidney  | 80                                                           | 36                   | 32                                          | 89%                                       |
| Heart   | 96                                                           | 25                   | 16                                          | 64%                                       |
| Adipose | 38                                                           | 5                    | 5                                           | 100%                                      |
| LCLs    | 63                                                           | 16                   | 12                                          | 75%                                       |
|         | <b>456</b>                                                   | <b>157</b>           | <b>134</b>                                  | <b>85%</b>                                |
